# Supplementary material
Source: publisher site journal article supplement (https://www.dovepress.com/get_supplementary_file.php?f=242789.xlsx)
Supplement: Supplementary file 1 [file get_supplementary_file.php]

## Sheet: up_DPN_vs_T2DM
ProbeName	P-value	FDR	Fold Change	Regulation	type	transcript_type	seqname	GeneSymbol	source	RNAlength	chrom	strand	txStart	txEnd	Sequence	EntrezID	relationship	Associated_gene_acc	Associated_gene_name	Associated_protein_name	Associated_gene_strand	associated_gene_start	Associated_gene_end	group-DPN(raw)	group-T2DM(raw)	group-DPN(normalized)	group-T2DM(normalized)	[DPN](raw)	[DPN](raw)	[DPN](raw)	[DPN](raw)	[T2DM](raw)	[T2DM](raw)	[T2DM](raw)	[T2DM](raw)	[ DPN](normalized)	[DPN](normalized)	[ DPN](normalized)	[DPN](normalized)	[T2DM](normalized)	[T2DM](normalized)	[T2DM](normalized)	[ T2DM](normalized)
ASRNV20028202	0.00261155	0.0458172	9.02568	up	noncoding	long noncoding	XR_345744	LOC102548423	RefSeq model	1426	chr4	+	58692528	58700209	TTTTCCATCTCTGTTCATCTTTCCTCTCTCCAACATGGCTGATCAACAGGTAAGTCAGAC	102548423	intergenic							76.4649	8.06277	6.21907	3.04503	79.347	72.9643	77.5608	75.9875	13.7419	7.23638	6.27282	5	5.97335	6.50837	5.92276	6.47179	4.91161	2.3886	2.53173	2.34821
ASRNV20030987	0.0019653	0.0386746	8.33953	up	noncoding	long noncoding	XR_590530	LOC102552565	RefSeq model	924	chr1	-	213532580	213548090	GAATCTGCTGCTACCCTGTTCTCTTCAGAAGTAAGTTTGATCTGTCTCTAAAACAAACAA	102552565	intergenic							81.2478	9.60154	6.28942	3.22945	93.38	68.086	86.6147	76.9104	13.8801	11.0748	8.45121	5	6.19583	6.4037	6.06661	6.49153	4.92868	2.77731	2.8636	2.34821
ASRNV20030081	0.00276697	0.0474973	7.87764	up	noncoding	long noncoding	XR_589334	LOC103690583	RefSeq model	1019	chr9	-	111815588	111820679	GTTATCCCAGTGTGTTTGGATGTCAAAGTCATGCCCTGCTTTTCTCTCTAGGATTCCTTC	103690583	intergenic							82.2162	10.5141	6.30362	3.32586	89.8976	64.3598	87.177	87.4304	14.2841	9.45169	13.3205	5	6.14141	6.31935	6.07717	6.67655	4.97265	2.56698	3.41558	2.34821
ASRNV20027911	4.84805e-06	0.000831464	7.28361	up	noncoding	long noncoding	XR_344084	LOC102546661	RefSeq model	4942	chr2	-	51767119	51881440	TAAAGGCTTAAATTTAAATACACCTCACAAATCTTGTCATTGTCCTCCTTTCTGGGTCCG	102546661	intergenic							38.8058	5	5.27071	2.40606	37.7596	38.794	37.6932	40.9764	5	5	5	5	4.99503	5.56519	4.95014	5.57249	2.62093	2.32191	2.3332	2.34821
ASRNV20029205	0.00147883	0.0326384	6.68931	up	noncoding	long noncoding	XR_354471	Tnfrsf14	RefSeq model	3684	chr5	-	175784221	175793180	TTGATTTCCTGTGTTCCTCTGGAGTTCCTTAGTCCTCTTTGGAGCCTAGGTCTATAGTAG	366518	exon sense-overlapping	NM_001015034	Tnfrsf14	tumor necrosis factor receptor superfamily, member 14	-	175784221	175791855	85.4329	12.1066	6.35371	3.61185	86.6146	66.6003	99.7621	88.7545	14.2401	10.6394	13.4854	10.0616	6.09307	6.37138	6.24837	6.70202	4.96785	2.71435	3.42945	3.33575
ASRNV20027428	6.92469e-06	0.000995521	6.16665	up	noncoding	long noncoding	XR_341242	LOC102548530	RefSeq model	3994	chr16	-	81124927	81129007	TACTGCACCAAAATGTGAGCAGGAAGTGTGTCTGTTTTCTTTTCCAGTTCACTCCGGTTG	102548530	intronic antisense	ENSRNOT00000057740	Grtp1		+	81104733	81154361	34.7463	5.50175	5.10827	2.48378	32.9051	31.775	35.3107	38.9942	5	6.49258	5	5.51442	4.80969	5.25773	4.86425	5.5014	2.62093	2.36904	2.3332	2.61197
ASRNV20029275	0.00246241	0.0441741	6.15134	up	noncoding	long noncoding	XR_355421	LOC102550725	RefSeq model	1115	chr7	-	37855801	37857641	AGCTAGCAAAATATTAAAGTTTGAACTCGGACATCTCCCAATCTCTGATTCTCTTCACAG	102550725	bidirectional	NM_017258	Btg1	B-cell translocation gene 1, anti-proliferative	+	37858320	37860578	164.055	26.3476	7.28821	4.6673	210.372	163.275	139.749	142.825	29.6318	36.0721	24.5619	15.1246	7.26752	7.76329	6.71148	7.41054	6.06518	4.40594	4.2733	3.9248
ASRNV20003529	0.00199941	0.0391751	6.14525	up	noncoding	pseudogene	ENSRNOT00000040186	AABR06022401.2	Ensembl	315	chr3	+	22382442	22382759	TTATTATTGTCAGCAGCATTATGATACTCCTCTCACAGTTCTTCAGCCTCCTACACAAAC		intergenic							57.4733	8.89067	5.82135	3.20188	60.7627	61.8294	43.9881	63.3128	10.1224	10.8465	8.75896	5.83483	5.64501	6.26489	5.15906	6.21643	4.48211	2.74664	2.90501	2.67374
ASRNV20030986	1.52863e-05	0.00156662	5.7387	up	noncoding	long noncoding	XR_590529	LOC103691256	RefSeq model	1863	chr1	-	216313002	216314981	GCTCTTGGCTTTTGTTTGAATTTTACATGTTGATCTTACCTTTCTGCTACTGACCCCCCT	103691256	intronic antisense	NM_012861	Mgmt	O-6-methylguanine-DNA methyltransferase	+	216161434	216388310	30.7896	5	4.92678	2.40606	32.7341	25.3056	27.8196	37.2992	5	5	5	5	4.80365	4.92205	4.5464	5.43503	2.62093	2.32191	2.3332	2.34821
ASRNV20033446	0.00246771	0.0441925	5.60424	up	noncoding	long noncoding	XR_593410	LOC103692840	RefSeq model	788	chr7	+	41882095	41891285	TCTTCCTCAGCCTTTGTTTTCCTGGTTTCTGTGGAACGAGTTCATGTCTCAAGGCAAGTT	103692840	intergenic							57.9423	10.0438	5.82325	3.33674	52.1968	50.2926	70.7808	58.4991	12.1971	12.9485	9.45074	5.57906	5.43704	5.96228	5.79145	6.10224	4.74355	2.98254	2.99653	2.62432
ASRNV20034666	0.000242428	0.00905911	5.56242	up	noncoding	long noncoding	XR_595034	LOC103693543	RefSeq model	1931	chr15	-	36551669	36557245	CTGGCAACGCTGGAGTGACTAATGAATTTCCACTTCACAGGGCTTTTTTATTTTTAGCTT	103693543	intronic antisense	ENSRNOT00000012019	LOC100364854		+	36481063	36667380	34.8912	5.15488	4.88705	2.41133	70.0587	20.2164	27.2313	22.0584	5	5.61954	5	5	5.81903	4.57181	4.51751	4.63984	2.62093	2.34299	2.3332	2.34821
ASRNV20034666	0.000242428	0.00905911	5.56242	up	noncoding	long noncoding	XR_595034	LOC103693543	RefSeq model	1931	chr15	-	36551669	36557245	CTGGCAACGCTGGAGTGACTAATGAATTTCCACTTCACAGGGCTTTTTTATTTTTAGCTT	103693543	intronic antisense	ENSRNOT00000060254	LOC100364854		+	36470106	36667371	34.8912	5.15488	4.88705	2.41133	70.0587	20.2164	27.2313	22.0584	5	5.61954	5	5	5.81903	4.57181	4.51751	4.63984	2.62093	2.34299	2.3332	2.34821
ASRNV20034666	0.000242428	0.00905911	5.56242	up	noncoding	long noncoding	XR_595034	LOC103693543	RefSeq model	1931	chr15	-	36551669	36557245	CTGGCAACGCTGGAGTGACTAATGAATTTCCACTTCACAGGGCTTTTTTATTTTTAGCTT	103693543	intronic antisense	ENSRNOT00000072962	LOC100364854		+	36423075	36667380	34.8912	5.15488	4.88705	2.41133	70.0587	20.2164	27.2313	22.0584	5	5.61954	5	5	5.81903	4.57181	4.51751	4.63984	2.62093	2.34299	2.3332	2.34821
ASRNV20033417	2.93922e-05	0.00228751	5.50247	up	noncoding	long noncoding	XR_593379	LOC102548260	RefSeq model	7348	chr7	-	32999384	33091073	CACAAAACCTTGCCACTGAAAACTCAGATGTAAACCTCATTCTTTCCCCTTTGTGACATG	102548260	intergenic							32.8803	6.52644	5.0365	2.57642	30.9043	36.8064	29.6102	34.2002	5	10.3217	5.4993	5.28472	4.72594	5.48503	4.62429	5.31075	2.62093	2.6785	2.44267	2.5636
ASRNV20030166	0.00151204	0.0331361	5.41473	up	noncoding	long noncoding	XR_589449	LOC103690385	RefSeq model	3999	chr9	-	113651106	113682723	TTGCTTTGGTGGATATAAATAGTAGACCCTGGTTTTCTCCTGGGATTGGTCAGTAGGTGG	103690385	intergenic							38.7576	6.18846	5.25391	2.81703	42.7213	32.6417	39.4928	40.1747	7.67803	6.49707	5.57872	5	5.16263	5.2972	5.01096	5.54486	4.09987	2.36916	2.45085	2.34821
ASRNV20028888	0.00295775	0.0494836	5.38336	up	noncoding	long noncoding	XR_350156	Igfl3	RefSeq model	2333	chr1	+	80719499	80726508	ACTCTCTGACACTTTTCTCTGAAAGCTCTCACCTAACTTGCTCTGTTTCCATGGCAGGTT	361516	exon sense-overlapping	NM_001108474	Igfl3	IGF-like family member 3	+	80719458	80726515	38.3511	5.92616	5.24508	2.81657	36.0388	34.4282	41.4269	41.5105	8.70463	5	5	5	4.93556	5.37871	5.07344	5.59262	4.26297	2.32191	2.3332	2.34821
ASRNV20031392	0.000607212	0.0175077	5.3808	up	noncoding	long noncoding	XR_591007	LOC103690087	RefSeq model	766	chr2	-	125032286	125039390	TTCAAGAGTACTTCAAGAGTTTTCCTCCCATCTCTGGTGCATCAAGTCTCAGCAGGTTTA	103690087	intergenic							51.4279	9.66272	5.67531	3.24749	50.5873	50.3595	51.0879	53.6769	7.98823	15.9751	9.10123	5.5863	5.3962	5.96605	5.35948	5.97951	4.15382	3.25796	2.95266	2.62552
ASRNV20029378	2.62992e-05	0.00212674	5.36266	up	noncoding	pseudogene	XR_357013	LOC100912473	RefSeq model	4202	chr9	+	53107355	53111557	CTCCTTTCTGTTCTTTTCTTAACCTCTCTTAATTTTTAGGAGCCTGCGATAAAGAAGAAA	100912473	exon sense-overlapping	ENSRNOT00000033079	AABR06060224.1		+	53110617	53111288	31.6243	5.98837	4.87704	2.45409	25.0459	22.4268	52.3441	26.6802	5	8.95347	5	5	4.44678	4.73545	5.3965	4.92942	2.62093	2.51403	2.3332	2.34821
ASRNV20034699	0.000232455	0.0087496	5.24609	up	noncoding	long noncoding	XR_595078	LOC103693574	RefSeq model	895	chr11	+	61020244	61044191	AACCACTGATCTGCTTTTTGCTGCTCCTGATTAGCTGGCACTGTTAAGAATTTTATTGAA	103693574	intergenic							39.0791	6.74577	5.26432	2.87308	43.6087	32.6638	40.1677	39.8761	5.82817	7.80609	8.01511	5.33371	5.19031	5.29904	5.03434	5.5336	3.70241	2.41458	2.8019	2.57343
ASRNV20028566	1.08118e-05	0.00126267	5.06577	up	noncoding	long noncoding	XR_348025	LOC102547967	RefSeq model	2365	chr7	+	104072084	104139574	AGTTCACTTCTGGATATACCTGCTTCATTTTTTCTCTCCTGGCCAGACATTTAGCCTTGT	102547967	intergenic							27.1179	5	4.74684	2.40606	23.0296	24.0417	31.4958	29.9044	5	5	5	5	4.33476	4.8404	4.71072	5.10148	2.62093	2.32191	2.3332	2.34821
ASRNV20034510	0.00151349	0.0331361	4.9432	up	noncoding	long noncoding	XR_594859	LOC102548607	RefSeq model	396	chr10	+	78234897	78280141	AATGCTCTAAAAATTATAGCCTGGTTCTCTAGACTCCATCCATGAGCTCTTCCCACAAGC	102548607	intron sense-overlapping	ENSRNOT00000042211	RGD1564550		+	78264200	78264572	61.1529	12.0347	5.89939	3.59395	75.4318	57.1198	55.543	56.517	12.4473	15.674	11.3007	8.71695	5.9162	6.14846	5.47924	6.05366	4.7695	3.23064	3.21318	3.16247
ASRNV20033338	0.000520679	0.0156162	4.92602	up	noncoding	long noncoding	XR_593289	LOC102552854	RefSeq model	3306	chr14	-	33404813	33410871	CTGTTCTAAAGGACACATCGTTTTCATTCTTGGGCTGTTTTGCTCTTTCTCTTTTCTCAG	102552854	natural antisense	NM_057198	Ppat	phosphoribosyl pyrophosphate amidotransferase	+	33371453	33405832	56.5848	11.1396	5.78652	3.48609	50.5267	45.8494	66.6688	63.2945	9.28461	15.5102	9.89484	9.86865	5.39503	5.81643	5.71864	6.21597	4.36099	3.21667	3.05216	3.31455
ASRNV20031172	9.50939e-06	0.00118458	4.80967	up	noncoding	long noncoding	XR_590745	LOC102547573	RefSeq model	2922	chr1	-	284843551	284848389	ATTAACCGAGGACAGAAATTCCACCTTTCCTTTGCTTGAACAGAGTGCTTCACGACTGAC	102547573	intergenic							25.5563	5.15937	4.67741	2.41148	24.82	25.4221	24.9899	26.9934	5	5.6375	5	5	4.43394	4.92868	4.401	4.94603	2.62093	2.34357	2.3332	2.34821
ASRNV20032357	0.000115535	0.00553656	4.72664	up	noncoding	long noncoding	XR_592146	LOC100912188	RefSeq model	2789	chr4	+	162596309	162618879	TTTGTTGGATGAGGCTACTGACTTGTCTGCACTCAAAACTCAAGAACTGTCTCTCCCAGA	100912188	intergenic							65.1236	13.827	5.97147	3.73065	84.9777	60.0017	61.8721	53.643	9.39576	21.0542	13.963	10.8951	6.0663	6.21946	5.62132	5.97878	4.37737	3.62311	3.47775	3.44437
ASRNV20028135	0.00188215	0.0374657	4.62265	up	noncoding	long noncoding	XR_345323	LOC102552922	RefSeq model	4703	chr3	+	158162261	158167407	TGTTCTTCTCCCATAAAAACAGGAATAAAAGTTCTACTCACTCCAGGACAGGAAACAGAA	102552922	intergenic							48.7066	10.1219	5.5591	3.35038	58.6426	45.1184	55.2655	35.7998	10.5948	15.0304	7.57588	7.28671	5.59693	5.78914	5.47189	5.37843	4.54784	3.18002	2.73109	2.94255
ASRNV20036001	9.64386e-07	0.000392717	4.54439	up	noncoding	long noncoding	XR_597290	LOC103694356	RefSeq model	563	chr19	-	66638485	66641888	GGAGCTAGATTGGTGACTAACAAGCTCCAATAAATTTCCTGTCTGTACCCCTCAAAGCTT	103694356	intronic antisense	NM_001108454	Cpne7	copine 7	+	66634978	66651622	24.7695	5.4187	4.60318	2.41909	29.9632	19.9792	24.8211	24.3143	5	6.6748	5	5	4.68361	4.55491	4.39189	4.78229	2.62093	2.37403	2.3332	2.34821
ASRNV20027058	0.00249722	0.0445454	4.51158	up	noncoding	long noncoding	XR_339015	LOC102548792	RefSeq model	915	chr11	-	76810460	76814593	TATCTTTTAAGCTCATCTCTCCCTGCGAGTGACTGTTTAAGGCCCCATCTTTCTCATGTG	102548792	intronic antisense	ENSRNOT00000002353	Tmem44	transmembrane protein 44	+	76805942	76840991	83.5581	18.5289	6.32386	4.15022	99.5772	72.7067	90.5043	71.4442	19.0032	25.4541	19.0648	10.5932	6.28613	6.5045	6.12269	6.38211	5.38841	3.9005	3.90347	3.4085
ASRNV20027058	0.00249722	0.0445454	4.51158	up	noncoding	long noncoding	XR_339015	LOC102548792	RefSeq model	915	chr11	-	76810460	76814593	TATCTTTTAAGCTCATCTCTCCCTGCGAGTGACTGTTTAAGGCCCCATCTTTCTCATGTG	102548792	intronic antisense	ENSRNOT00000073164	Tmem44	transmembrane protein 44	+	76810396	76818545	83.5581	18.5289	6.32386	4.15022	99.5772	72.7067	90.5043	71.4442	19.0032	25.4541	19.0648	10.5932	6.28613	6.5045	6.12269	6.38211	5.38841	3.9005	3.90347	3.4085
ASRNV20027316	0.00198381	0.0389648	4.50408	up	noncoding	long noncoding	XR_340617	LOC102554609	RefSeq model	710	chr15	-	29355143	29359954	ACATTAACCCTCTGCGCTTTCCAATCGTTGTTATTTTGAACTCGCTGTGCCTGAGTTGTG	102554609	intergenic							35.2906	6.614	4.97163	2.80039	31.888	19.9813	62.7041	26.5889	6.28356	9.68848	5.48396	5	4.76851	4.55528	5.63829	4.92442	3.82037	2.59393	2.43906	2.34821
ASRNV20032005	0.0024364	0.0440125	4.49618	up	noncoding	long noncoding	XR_591712	LOC103691905	RefSeq model	1748	chr13	+	56176397	56178513	TTTGATGGTCTATGATGGCTGTGCTCTGACTCCACCTGCTAAAAATCTACCACCTCAGAA	103691905	intergenic							76.0958	16.7355	6.1909	4.0222	97.425	64.5551	67.2557	75.1475	16.7116	22.9337	16.6235	10.6733	6.2544	6.32472	5.73106	6.45342	5.21068	3.74601	3.71511	3.417
ASRNV20029303	0.000414688	0.0132073	4.40608	up	noncoding	long noncoding	XR_356009	LOC102555387	RefSeq model	2181	chr7	+	140030801	140039924	GCAATCATTGGTACTACTGTCTTAATTGAGATGTAATAGAGATATAATGAGCTGTACGTG	102555387	intergenic							31.3162	6.70627	4.75418	2.61468	35.2758	13.3996	52.995	23.5943	5	8.93136	7.08144	5.81229	4.90473	3.95756	5.41687	4.73756	2.62093	2.51093	2.65616	2.67072
ASRNV20035265	9.63243e-07	0.000392717	4.3505	up	noncoding	long noncoding	XR_596373	LOC102547142	RefSeq model	1805	chr16	+	10873637	10891313	TGTCTTCTTCCTCATGTGACAGTCAAGTTATGCTTTCTGGTTATTGATCTGAGCATTCTT	102547142	intergenic							23.7321	5	4.52724	2.40606	30.9811	18.8387	24.4073	20.7015	5	5	5	5	4.73082	4.47386	4.36504	4.53926	2.62093	2.32191	2.3332	2.34821
ASRNV20029071	0.000335772	0.0114705	4.34567	up	noncoding	long noncoding	XR_352386	LOC102552809	RefSeq model	546	chr3	+	67598976	67599674	GTTCCCACCTCTGTAAGCTGTCACTTCTAGACATGGTAGTAAAACCTGGTGTTGTTCTAA	102552809	intergenic							30.1507	8.5708	4.89246	2.77288	33.4068	24.2645	32.6373	30.2941	5	9.1167	15.1665	5	4.82737	4.85662	4.75993	5.12591	2.62093	2.53058	3.5918	2.34821
ASRNV20034935	0.00118264	0.0277521	4.31516	up	noncoding	long noncoding	XR_595664	LOC103693703	RefSeq model	4496	chr15	-	56752820	56776555	TAATGACAAGGTTTTCTCCACTGTCTTCTATCATCTGGAACGAACTGGTCAACTTCACAA	103693703	intergenic							28.45	5.49206	4.80023	2.69081	35.9512	22.66	26.5931	28.5956	5.91053	6.05771	5	5	4.9317	4.75391	4.48068	5.03461	3.72531	2.35653	2.3332	2.34821
ASRNV20027122	0.00280499	0.047859	4.16503	up	noncoding	long noncoding	XR_339360	LOC102549550	RefSeq model	2545	chr12	+	8137180	8155619	TGGACAATAGTAGCATGTGGTCCCTTTCTTTCTCACTGAAAGTAACTATTTATATACTAG	102549550	natural antisense	NM_001012475	Rxfp2	relaxin/insulin-like family peptide receptor 2	-	8119971	8181214	28.4984	5.71777	4.81559	2.75726	32.4103	26.951	29.4769	25.1553	7.17114	5.69994	5	5	4.7912	5.01562	4.61666	4.83887	4.00208	2.34556	2.3332	2.34821
ASRNV20002530	0.000942075	0.0239005	4.12885	up	noncoding	pseudogene	ENSRNOT00000031809	Rn50_13_0842.1	Ensembl	637	chr13	-	84135373	84136010	CAATGTGGGATTATTGGTTTCAAACCAAACTGTGGCTTAGTTTCCCTGCACCGCCTTATT		intergenic							25.9812	5.08689	4.69049	2.64475	28.8585	23.4659	23.9364	27.6639	5.34758	5	5	5	4.63357	4.80383	4.33903	4.98553	3.5757	2.32191	2.3332	2.34821
ASRNV20008794	0.000506547	0.0153762	4.107	up	noncoding	long noncoding	ENSRNOT00000075984	Rn50_13_0865.1	Ensembl	559	chr13	-	86405816	86410631	TGCTTAGTAGTTACCATAAATCCCTAAAGTAAACAACACCCTCATCATCCTGCCTTACAG		intergenic							34.7518	8.2858	5.10955	3.07146	38.4401	35.0226	32.7548	32.7895	6.19894	10.8602	10.5801	5.50398	5.01879	5.40835	4.76537	5.24569	3.80054	2.74952	3.12705	2.60875
ASRNV20034564	2.61232e-05	0.00212674	4.06437	up	noncoding	long noncoding	XR_594919	LOC102551705	RefSeq model	972	chr10	-	98553185	98562846	CTCATCAAGTTGGAAGTGACCTATTCTAACCTTTCGCCTTCTTATTTCACCCCGTTTTTT	102551705	intergenic							21.8115	5	4.42909	2.40606	19.7455	17.828	23.9204	25.752	5	5	5	5	4.11512	4.38573	4.33767	4.87785	2.62093	2.32191	2.3332	2.34821
ASRNV20036601	2.83143e-05	0.00223726	4.03397	up	noncoding	long noncoding	XR_599012	LOC102549044	RefSeq model	4848	chr1	-	191786157	191799072	CACACTACCAGGCTGCCACCTGAAAGTTTTGTTTTTGCAGTTCCTTCTATAAGAGGTCTC	102549044	intergenic							21.9173	5	4.41826	2.40606	20.8667	15.4246	25.761	25.6168	5	5	5	5	4.19688	4.16653	4.43994	4.8697	2.62093	2.32191	2.3332	2.34821
ASRNV20028549	3.94291e-06	0.000728805	4.02926	up	noncoding	long noncoding	XR_347906	LOC102554030	RefSeq model	592	chr7	+	75277491	75279033	TTTCTCAGACAGAAGAATCCCTGATGCTTTTCCTCAACAGCCTTGTGGTGGTTTGCATAT	102554030	intergenic							22.5799	5.455	4.48477	2.47425	24.5228	19.6019	22.7403	23.4548	5	5.03607	6.78393	5	4.41957	4.52928	4.26225	4.72798	2.62093	2.32322	2.60466	2.34821
ASRNV20029022	0.00158431	0.03387	4.00543	up	noncoding	long noncoding	XR_351882	LOC102553016	RefSeq model	734	chr2	-	220852297	220853534	AAACCAAACTGGTTATAAAATAGATTCTGCTCTCCCTACTCTGCACTCTAACCCAGGAGC	102553016	intronic antisense	NM_001106451	Tbx15	T-box 15	+	220812285	220855072	349.43	78.3811	8.30899	6.30703	498.961	316.672	328.248	253.838	63.6002	111.934	76.5556	61.4347	8.34968	8.76664	7.84124	8.2784	7.24277	6.06918	5.88249	6.0337
ASRNV20027824	0.00232814	0.0427466	3.98499	up	noncoding	long noncoding	XR_343552	LOC102549072	RefSeq model	829	chr1	-	272473242	272475954	AGGGAACCAGCTGGTGACTTCTGACCTGCTCCAAACAACTTCTGCTTCTCAGACGTTGAG	102549072	intergenic							44.2973	11.1427	5.45313	3.45856	49.2811	40.0545	43.4536	44.4	7.32003	11.032	8.3894	17.8295	5.35892	5.614	5.14237	5.69725	4.02863	2.77277	2.8541	4.17872
ASRNV20001314	0.00208699	0.0400089	3.98059	up	noncoding	pseudogene	ENSRNOT00000016597	Rn50_1_1361.3	Ensembl	379	chr1	-	136065396	136065775	TAAAGGTAAAGGCCATTACCCCTCATCCTTTGCACCTGGATACACATGGAGATGAAGAAC		intergenic							32.2441	8.059	5.00027	3.00729	36.4139	31.2742	29.2498	32.0386	7.24805	12.3154	7.67252	5	4.94703	5.23341	4.60711	5.21353	4.01723	2.91654	2.74716	2.34821
ASRNV20032150	0.00287657	0.0488121	3.91142	up	noncoding	long noncoding	XR_591889	LOC102552372	RefSeq model	1056	chr3	+	174915819	174938836	TGAGGCAGCCTGTCTGGTTTTGATTCTCCTGGGATGAGCTCACATGTGTCATGAGGGCAA	102552372	intergenic							37.0724	8.79385	5.1708	3.2031	36.1578	28.9487	48.1451	35.0382	8.99279	8.50918	10.9875	6.68591	4.93953	5.11793	5.27758	5.34815	4.31146	2.47719	3.177	2.84677
ASRNV20032641	0.000160637	0.00678676	3.89282	up	noncoding	long noncoding	XR_592485	LOC103692343	RefSeq model	910	chr13	-	100157726	100164474	GACGAACAGTGTCTCCTTGGCTAGATGGGTTCAGGACCTTCCTAAAACATTAAAGTGTTG	103692343	intergenic							109.141	27.725	6.62629	4.66547	162.14	78.6444	123.2	72.5784	15.6782	44.8731	33.342	17.0067	6.92039	6.63058	6.5509	6.4033	5.11527	4.73883	4.70034	4.10746
ASRNV20035846	0.000379454	0.0125087	3.87608	up	noncoding	long noncoding	XR_597078	LOC102548977	RefSeq model	1349	chr18	+	78149947	78152949	ATTTCCGGAAGCTTAGCCCTTTGTCCAGTCTGCTTGCTCTGTGCGCATGCGTCCCACAGA	102548977	intergenic							84.1617	21.3387	6.33366	4.37906	87.9632	69.9193	101.59	77.1745	16.1166	30.1836	22.3518	16.7027	6.11451	6.44902	6.274	6.4971	5.15594	4.14535	4.13297	4.08198
ASRNV20028693	0.000847547	0.02221	3.84236	up	noncoding	long noncoding	XR_348763	LOC102554058	RefSeq model	893	chr8	+	120756122	120765072	ATTGTACTTATTACCTAGTCAATAGCTCAGGTCTCCACTGCTCCACTCAGCCATGGTCTT	102554058	intergenic							79.3814	20.6584	6.27034	4.32835	87.4036	77.3473	77.7584	75.0165	15.7921	27.3306	24.3963	15.1146	6.10493	6.60111	5.92558	6.44975	5.12521	4.00295	4.26146	3.92377
ASRNV20035035	0.000131089	0.00595628	3.78043	up	noncoding	long noncoding	XR_595868	LOC102550655	RefSeq model	2377	chr15	-	92550354	92557882	AATAGAGCCTGTAACGAACACAAGTTTACACCTTCTTCCTTTGAGAGAACCCATCACTGT	102550655	intergenic							20.2073	5	4.32461	2.40606	22.5218	20.5499	15.4434	22.3139	5	5	5	5	4.30494	4.59844	3.73929	4.65578	2.62093	2.32191	2.3332	2.34821
ASRNV20028311	0.00193519	0.0383006	3.74212	up	noncoding	long noncoding	XR_346445	LOC102549496	RefSeq model	1696	chr5	+	55046193	55049315	TTGTGTCACCCTCTAGTCTCTCGAGGTGGTTGGAGCAGAAGAAAGAGAAAAGGTTAACAT	102549496	intronic antisense	NM_001108970	Mob3b	MOB kinase activator 3B	-	55007529	55201845	25.3835	5.70883	4.58929	2.68543	37.7275	17.8805	23.7112	22.2148	5.72043	7.11488	5	5	4.99405	4.39132	4.32437	4.64741	3.67476	2.38554	2.3332	2.34821
ASRNV20029258	5.18999e-06	0.00086527	3.69422	up	noncoding	long noncoding	XR_355227	LOC102553109	RefSeq model	1971	chr7	-	3297635	3303045	CTCTTTCAAGGTGCAGACCAGAGAATACCAAAGGGTGCCATGTCTTGCCTATAATGTGTT	102553109	bidirectional	NM_017125	Cd63	Cd63 molecule	+	3303448	3305798	19.8924	5.14424	4.29626	2.41099	22.3854	16.2874	19.8017	21.0949	5	5.57694	5	5	4.29578	4.24857	4.07216	4.56852	2.62093	2.34162	2.3332	2.34821
ASRNV20032136	0.000745772	0.020173	3.68393	up	noncoding	long noncoding	XR_591874	LOC103691977	RefSeq model	4402	chr3	-	172578165	172583852	TTGTCTCTTCTCCTTAGGCACTGTTGGGCCACCCAACGAGGCCAAGCAATCCGGCTTAAA	103691977	intergenic							48.1514	13.2177	5.55989	3.67864	43.8479	42.428	60.1025	46.2272	9.98461	18.9646	14.7432	9.17833	5.19752	5.6902	5.58766	5.76417	4.46224	3.47848	3.55283	3.22102
ASRNV20036838	0.00263202	0.0460203	3.66354	up	noncoding	long noncoding	XR_600271	LOC103695174	RefSeq model	7294	chr3	-	89844371	89852313	TCTCAAGTAGACAGACTGTGTAGCCCGAATCCTCTTGGTGACCTCTGGATAATTGTTTAT	103695174	intergenic							24.1837	5.30388	4.57514	2.7019	23.908	19.1565	28.4933	25.1769	6.2155	5	5	5	4.38489	4.49658	4.57954	4.83954	3.80429	2.32191	2.3332	2.34821
ASRNV20035924	0.00177297	0.0359844	3.58933	up	noncoding	long noncoding	XR_597171	LOC102548089	RefSeq model	4574	chr19	-	32905041	32943440	ATCTGTTTTCTCCAGCTAGGACCCATCTCTAAAAGGTTTCACCCTCTGCCCTAATAGTGA	102548089	intergenic							73.4974	21.3029	6.16564	4.32192	80.0406	77.3844	64.6678	71.8969	15.2056	36.2601	18.1338	15.6122	5.98837	6.6032	5.68177	6.38922	5.06832	4.4146	3.83348	3.97129
ASRNV20036460	0.00172864	0.035365	3.57049	up	noncoding	long noncoding	XR_598329	LOC102549109	RefSeq model	1000	chr18	-	54512390	54626574	ATGTGATCCTAACATGCTCATGAATGAAAGTTCACACCCCTCTCTATGAAGATGTATGCA	102549109	intergenic							22.9574	5.21785	4.48472	2.6486	30.6594	20.1506	19.3705	21.6491	5.33796	5.53344	5	5	4.7156	4.56777	4.04497	4.61054	3.57278	2.34021	2.3332	2.34821
ASRNV20008958	1.30169e-05	0.00140352	3.5488	up	noncoding	long noncoding	ENSRNOT00000076316	Rn50_X_0559.3	Ensembl	647	chrX	-	55877421	55878068	TTGACTATCTGACTCCTTGGACCAGGTTATATCCCTGGGCTTTCAATGCTTATCCTGGTA		intron sense-overlapping	NM_177935	Il1rapl1	interleukin 1 receptor accessory protein-like 1	-	55629810	57548519	18.972	5	4.23339	2.40606	18.2606	16.486	20.1616	20.98	5	5	5	5	4.00502	4.2676	4.10173	4.55922	2.62093	2.32191	2.3332	2.34821
ASRNV20035789	2.30755e-05	0.00202419	3.54785	up	noncoding	long noncoding	XR_597005	LOC102546473	RefSeq model	1135	chr18	+	49518121	49549559	GAATGGACCATTAGTTCTGTCTTCTTCTGATAAAATCCACTCTGCGGTCATTTTAAAAAA	102546473	intergenic							19.0315	5.31589	4.24317	2.41622	20.2736	17.7864	17.3517	20.7144	5	6.26358	5	5	4.15265	4.38181	3.89831	4.53992	2.62093	2.36256	2.3332	2.34821
ASRNV20028113	0.00290679	0.0491638	3.54704	up	noncoding	long noncoding	XR_345206	LOC102552477	RefSeq model	502	chr3	+	130747985	130811011	TTTCTCAGTCCACATCTCCGTGACCACAACCTCTCTCATAATGAAGAATAACCAAGATAA	102552477	intergenic							42.6425	11.8824	5.39364	3.56702	49.7461	42.7533	35.2793	42.7914	10.5383	16.0194	12.4762	8.49582	5.37291	5.70296	4.86326	5.63541	4.53878	3.26051	3.33447	3.13434
ASRNV20030273	5.07454e-05	0.00332447	3.53744	up	noncoding	long noncoding	XR_589615	LOC102557273	RefSeq model	4207	chrX	+	2642625	2725460	CTCAGTGCAGACCAAGTCCCTGGACTTTTACTTACTTACCTTCATCCACTGGCTCTAGGT	102557273	intronic antisense	ENSRNOT00000061140	Jade3		-	2678419	2745615	18.9182	5	4.22877	2.40606	16.8437	17.4389	19.5171	21.873	5	5	5	5	3.88686	4.35005	4.0538	4.62436	2.62093	2.32191	2.3332	2.34821
ASRNV20030273	5.07454e-05	0.00332447	3.53744	up	noncoding	long noncoding	XR_589615	LOC102557273	RefSeq model	4207	chrX	+	2642625	2725460	CTCAGTGCAGACCAAGTCCCTGGACTTTTACTTACTTACCTTCATCCACTGGCTCTAGGT	102557273	intronic antisense	NM_001271265	Jade3	jade family PHD finger 3	-	2678419	2835212	18.9182	5	4.22877	2.40606	16.8437	17.4389	19.5171	21.873	5	5	5	5	3.88686	4.35005	4.0538	4.62436	2.62093	2.32191	2.3332	2.34821
uc.308-_P1	0.00158948	0.03387	3.52208	up	noncoding	long noncoding	uc.308-	uc.308	UCR	277	chr1	-	272647810	272648087	GAGCGTTAGCAGTAATTTTATTTGCCTTGCCTCTCTCTTTCCTAACAACATGCCTCTCTC		intronic antisense	ENSRNOT00000022426	Btrc		+	272580307	272705419	95.0704	26.69	6.5311	4.71468	103.043	89.9394	93.5241	93.7757	21.5079	37.671	25.6592	21.922	6.33517	6.83448	6.16486	6.78991	5.57525	4.47581	4.3289	4.47875
uc.308-_P1	0.00158948	0.03387	3.52208	up	noncoding	long noncoding	uc.308-	uc.308	UCR	277	chr1	-	272647810	272648087	GAGCGTTAGCAGTAATTTTATTTGCCTTGCCTCTCTCTTTCCTAACAACATGCCTCTCTC		intronic antisense	NM_001007148	Btrc	beta-transducin repeat containing E3 ubiquitin protein ligase	+	272540499	272705421	95.0704	26.69	6.5311	4.71468	103.043	89.9394	93.5241	93.7757	21.5079	37.671	25.6592	21.922	6.33517	6.83448	6.16486	6.78991	5.57525	4.47581	4.3289	4.47875
ASRNV20034427	1.23796e-05	0.00137605	3.51969	up	noncoding	long noncoding	XR_594765	LOC102547395	RefSeq model	3483	chr10	-	58026380	58055421	AGAGTTCTCATGGGAGGAAAAGATTCACAAACTCAACTTCCTCCTCATACTGGTGGCTCA	102547395	intergenic							20.8132	6.6671	4.36614	2.55069	23.6608	21.4104	19.7628	18.4188	5	9.68374	6.98467	5	4.37082	4.66313	4.07024	4.36035	2.62093	2.59321	2.6404	2.34821
ASRNV20032945	0.000245838	0.00913489	3.51881	up	noncoding	long noncoding	XR_592829	LOC103692533	RefSeq model	1327	chr6	+	1992266	1994453	CCTTTTGGTTATCTCTAATTGTGTTTTCTGGTGTGTTGTAATAAACTGCTTCATCCTGAA	103692533	intergenic							20.749	5.54434	4.30281	2.48772	28.3206	22.2798	19.607	12.7887	5	5.09322	7.08413	5	4.6091	4.72625	4.06038	3.81551	2.62093	2.32526	2.65649	2.34821
ASRNV20033054	0.00103005	0.0253858	3.51204	up	noncoding	long noncoding	XR_592960	LOC103692596	RefSeq model	930	chr6	+	43797713	43805556	AAGTGCATCGTCTACCTGCTTGCTTTTCCGCCATGTTTCAAAGCAACACTAAACCTCTTA	103692596	intergenic							23.6742	6.34655	4.53904	2.72673	29.1083	20.9548	23.5307	21.103	5.39979	9.9864	5	5	4.64359	4.62792	4.31525	4.5694	3.59058	2.63493	2.3332	2.34821
ASRNV20030482	2.50923e-06	0.0006225	3.51187	up	noncoding	long noncoding	XR_589933	LOC102551987	RefSeq model	1338	chr1	+	48862167	48870688	TTATGCAAGATACACCAGCCTCCAGTGCATAGCATGTCAAGTTTTTACAAGGGTACTGGC	102551987	intergenic							19.5789	5.92884	4.27741	2.46517	22.1299	17.0186	19.328	19.8389	5	8.21725	5.49812	5	4.27921	4.31493	4.04214	4.47337	2.62093	2.44905	2.4425	2.34821
ASRNV20035444	4.842e-05	0.00319233	3.5062	up	noncoding	long noncoding	XR_596584	LOC102552469	RefSeq model	1864	chr17	+	6777816	6788389	GAAGATGTTGCTGTAAAATTATAAAAAAGAAATGCTGTCTTTAACCCCACACTAGGTCCA	102552469	intergenic							25.7184	8.6089	4.65557	2.84566	29.209	27.0749	27.2993	19.2903	5	14.9058	8.40413	6.12568	4.64715	5.02267	4.52116	4.43129	2.62093	3.16764	2.85656	2.73751
ASRNV20027647	0.00265342	0.0463162	3.45342	up	noncoding	long noncoding	XR_342541	LOC102553526	RefSeq model	2083	chr1	-	23459590	23464588	GACTGCACCTTCCTGTGAAAGAGCAACGAGTACCTTTGTTAAAGATCATTTAAACATGCA	102553526	intergenic							27.8768	7.25537	4.75844	2.97041	33.1655	22.784	32.6745	22.8832	7.39633	8.38113	7.60867	5.63534	4.8191	4.76152	4.76152	4.69161	4.0445	2.46536	2.73721	2.63459
ASRNV20029405	7.27096e-05	0.00416557	3.42233	up	noncoding	long noncoding	XR_357377	LOC102554009	RefSeq model	3794	chr10	-	4900260	4911417	AAAGTGGACCGAGCCTGGGGTCTAAGTGCTCTGTATTCAAATTACTCTCTCAACCAATTC	102554009	intronic antisense	ENSRNOT00000044626	Grin2a		+	4527219	4936773	18.2891	5.20658	4.18794	2.41296	18.4579	20.1664	16.1422	18.39	5	5.82631	5	5	4.02426	4.56869	3.79979	4.35902	2.62093	2.34951	2.3332	2.34821
ASRNV20029405	7.27096e-05	0.00416557	3.42233	up	noncoding	long noncoding	XR_357377	LOC102554009	RefSeq model	3794	chr10	-	4900260	4911417	AAAGTGGACCGAGCCTGGGGTCTAAGTGCTCTGTATTCAAATTACTCTCTCAACCAATTC	102554009	intronic antisense	NM_012573	Grin2a	glutamate ionotropic receptor NMDA type subunit 2A	+	4524961	4936873	18.2891	5.20658	4.18794	2.41296	18.4579	20.1664	16.1422	18.39	5	5.82631	5	5	4.02426	4.56869	3.79979	4.35902	2.62093	2.34951	2.3332	2.34821
ASRNV20027972	2.99023e-06	0.000666215	3.40108	up	noncoding	long noncoding	XR_344450	LOC102552298	RefSeq model	1407	chr2	+	203405731	203407690	ACAAGCAATTCCTGTGAGTACTGGCCTTCAAATGAAAGGTTGTCCTTTGATCCCTCACTG	102552298	intergenic							19.367	6.21768	4.25911	2.49311	22.2237	16.4609	19.4226	19.361	5	9.7444	5.12631	5	4.28625	4.26454	4.04791	4.43773	2.62093	2.6021	2.40123	2.34821
ASRNV20032866	1.21056e-06	0.000417685	3.39911	up	noncoding	long noncoding	XR_592745	LOC102551010	RefSeq model	3346	chr14	+	4054138	4060509	TTCAAATGACCGGGATAACAACCTCTGTCTTACATGGCTGTTGTGTGAGCTGTTGTCACA	102551010	intergenic							18.3967	5	4.17122	2.40606	21.9932	14.6727	19.6797	17.2411	5	5	5	5	4.27211	4.0862	4.0638	4.26276	2.62093	2.32191	2.3332	2.34821
ASRNV20036560	0.00040514	0.0130161	3.38345	up	noncoding	long noncoding	XR_598817	LOC102557098	RefSeq model	7280	chr1	-	108598301	108620643	AGAGGTAGTGGTATATGGTCTGTATATATTGTTCATACATCCTGGCAAGCTGCTAGTTTC	102557098	intergenic							18.7748	5	4.16455	2.40606	12.4206	17.7355	26.8978	18.0454	5	5	5	5	3.45682	4.37605	4.49753	4.32781	2.62093	2.32191	2.3332	2.34821
ASRNV20035839	3.33752e-06	0.000666215	3.34527	up	noncoding	long noncoding	XR_597064	LOC102553737	RefSeq model	886	chr18	+	75222190	75249627	TACATTGGATGATCTCTGCACTACATGGCTTCTCTTGATGCAGTAGGCTTTCTACCAAGC	102553737	intergenic							18.1351	5.1029	4.17199	2.42987	19.3208	16.6013	18.4606	18.1578	5	5	5.41162	5	4.08638	4.27799	3.98475	4.33885	2.62093	2.32191	2.42843	2.34821
ASRNV20028447	1.39653e-05	0.00147177	3.34123	up	noncoding	long noncoding	XR_347291	LOC102548655	RefSeq model	1867	chr6	+	101545374	101547723	AGATAAGCCAAGAAGAATCTCGACAGACAAGTCTTGCTGAGTTCCCCATGCAGTCAGTTA	102548655	intronic antisense	NM_001025121	Cdkl1	cyclin dependent kinase like 1	-	101526899	101570647	18.8334	5.51983	4.20746	2.46707	24.3643	16.2884	17.0665	17.6144	5	5.60702	6.47229	5	4.41183	4.24888	3.87617	4.29295	2.62093	2.34259	2.55657	2.34821
ASRNV20028085	0.000141045	0.00619372	3.3409	up	noncoding	long noncoding	XR_345079	LOC102548892	RefSeq model	351	chr3	-	99994705	100002791	ACAGGCTGCTTCAAAGCACAGAGAAGTAAAGGATTACTAAGGGCTCCCCCAAAGAATACT	102548892	natural antisense	ENSRNOT00000011035	Elf5		+	99994507	100014545	25.5303	9.01572	4.6576	2.91736	28.5479	24.6097	27.5369	21.4267	5	10.1521	13.5582	7.35255	4.62038	4.88093	4.53483	4.59426	2.62093	2.65649	3.43718	2.95486
ASRNV20028085	0.000141045	0.00619372	3.3409	up	noncoding	long noncoding	XR_345079	LOC102548892	RefSeq model	351	chr3	-	99994705	100002791	ACAGGCTGCTTCAAAGCACAGAGAAGTAAAGGATTACTAAGGGCTCCCCCAAAGAATACT	102548892	natural antisense	NM_001108956	Elf5	E74-like factor 5	+	99988280	100016439	25.5303	9.01572	4.6576	2.91736	28.5479	24.6097	27.5369	21.4267	5	10.1521	13.5582	7.35255	4.62038	4.88093	4.53483	4.59426	2.62093	2.65649	3.43718	2.95486
ASRNV20034503	0.000551648	0.0163613	3.33955	up	noncoding	long noncoding	XR_594851	LOC103693414	RefSeq model	1190	chr10	+	73720928	73722224	AGCGTACAGCCTGTTGAACGTCTATAGGGAGATAGGTTCTCCCACAAAATACTGTCAGAA	103693414	intron sense-overlapping	ENSRNOT00000003179	Dgke		+	73703858	73725801	75.3324	21.8405	6.17089	4.43123	96.6103	68.0058	77.8471	58.8664	15.6779	27.9514	22.8402	20.8926	6.24461	6.40014	5.92744	6.11135	5.11501	4.03622	4.16167	4.41203
ASRNV20034503	0.000551648	0.0163613	3.33955	up	noncoding	long noncoding	XR_594851	LOC103693414	RefSeq model	1190	chr10	+	73720928	73722224	AGCGTACAGCCTGTTGAACGTCTATAGGGAGATAGGTTCTCCCACAAAATACTGTCAGAA	103693414	intron sense-overlapping	NM_001039341	Dgke	diacylglycerol kinase epsilon	+	73703726	73725818	75.3324	21.8405	6.17089	4.43123	96.6103	68.0058	77.8471	58.8664	15.6779	27.9514	22.8402	20.8926	6.24461	6.40014	5.92744	6.11135	5.11501	4.03622	4.16167	4.41203
ASRNV20034831	0.00222391	0.0417781	3.3193	up	noncoding	long noncoding	XR_595366	Srrm4	RefSeq model	7227	chr12	+	47651788	47700496	ACAAAAAACAGCACCGAGGTCGGTCTCCTGAGGAAGGGCGGAAATCCCGCCGAACACATT	498189	exon sense-overlapping	ENSRNOT00000001507	Srrm4	serine/arginine repetitive matrix 4	+	47542289	47695044	27.5056	9.58723	4.73549	3.00461	20.0094	22.2545	27.6559	40.1026	5	13.922	8.73283	10.6941	4.1362	4.72483	4.53926	5.54165	2.62093	3.0772	2.90102	3.41928
ASRNV20031243	2.4863e-05	0.00208747	3.31076	up	noncoding	long noncoding	XR_590826	LOC102548179	RefSeq model	1296	chr12	-	48971618	48973100	TTTACTAAGAGTTTTGATGTTATCTGGTCTGATCTGTATTTGGCTTACTTTGCTCCTCAG	102548179	intergenic							17.8592	5.37553	4.14507	2.41791	18.0576	15.2546	17.7363	20.3885	5	6.50213	5	5	3.98695	4.14675	3.92854	4.51805	2.62093	2.3693	2.3332	2.34821
ASRNV20027211	5.97511e-06	0.000896353	3.28674	up	noncoding	long noncoding	XR_339935	LOC102552409	RefSeq model	4266	chr13	-	102895589	102902029	CCACACCTTTCATAGCCTAGTCACTCTGCTGTGATATGTCACTTTTAAGAATTTAAAATT	102552409	intronic antisense	ENSRNOT00000003641	Cnst	consortin, connexin sorting protein	+	102879476	102922898	17.7488	5	4.12272	2.40606	19.6855	13.6135	18.98	18.7163	5	5	5	5	4.11073	3.97849	4.01873	4.38292	2.62093	2.32191	2.3332	2.34821
ASRNV20035841	0.000705088	0.0195565	3.22347	up	noncoding	long noncoding	XR_597072	LOC102548287	RefSeq model	1126	chr18	-	76997236	77006143	TTATCTTTGCAGTTAGGGAAGAAGGGAACACATCCCAGGATCCCTTGCTCTGCTTTCTAT	102548287	intergenic							17.9414	5.4257	4.14154	2.45292	14.5406	17.8062	15.6401	23.7787	5	5.70421	5.9986	5	3.67728	4.38292	3.75652	4.74943	2.62093	2.34569	2.49687	2.34821
ASRNV20028671	8.78987e-06	0.00112982	3.21976	up	noncoding	long noncoding	XR_348650	LOC102554424	RefSeq model	1109	chr8	+	90511765	90536100	GACATCTGGCTTCGTTAGTTGCTATGGAAACATCAGCTCCAGGTCCAATCAATGTCTACT	102554424	intergenic							17.3227	5	4.09301	2.40606	20.993	14.6656	16.4033	17.2291	5	5	5	5	4.20507	4.08536	3.81963	4.262	2.62093	2.32191	2.3332	2.34821
ASRNV20008144	4.35256e-05	0.00298071	3.21197	up	noncoding	pseudogene	ENSRNOT00000074475	AABR06028497.1	Ensembl	417	chr4	-	1769278	1769697	AGGGTTGCATGACTCAACTGTTTTTCTTTCTCTTTTTTGTCATCACTGAATGCTACATGT		intergenic							17.6364	5.8476	4.12562	2.44216	19.94	15.3979	15.5606	19.6473	5	8.3904	5	5	4.13012	4.16352	3.74935	4.45947	2.62093	2.4663	2.3332	2.34821
ASRNV20029083	0.0017111	0.0352119	3.20757	up	noncoding	long noncoding	XR_352579	LOC102547230	RefSeq model	5567	chr3	-	126204205	126223931	GGCCCTCTTCTAAGCTCTGGACTCCTATTTCATCCAATAAACAGATCAGATGCTTTCTTC	102547230	intronic antisense	NM_001100978	Tmem127	transmembrane protein 127	+	126202792	126215589	94.8297	28.9005	6.5091	4.82762	112.628	79.5665	97.978	89.146	21.9002	31.8776	38.5267	23.2975	6.45269	6.64874	6.22409	6.71086	5.60355	4.22698	4.90361	4.57632
ASRNV20029023	4.75551e-06	0.000831464	3.18697	up	noncoding	long noncoding	XR_351905	Phtf1	RefSeq model	4645	chr2	+	225875580	225935871	AGCAGTGAGCCCCATGTGGAATTTCTCTCTTCAAGTGTATAAACATCGCCTTGTACGCAT	252962	exon sense-overlapping	NM_001191102	Phtf1	putative homeodomain transcription factor 1	+	225878014	225916841	19.1817	6.54205	4.25319	2.581	21.7436	18.8404	18.3389	17.8038	5	9.77484	5.88537	5.50799	4.25477	4.47406	3.97437	4.30955	2.62093	2.60541	2.48684	2.61082
ASRNV20029023	4.75551e-06	0.000831464	3.18697	up	noncoding	long noncoding	XR_351905	Phtf1	RefSeq model	4645	chr2	+	225875580	225935871	AGCAGTGAGCCCCATGTGGAATTTCTCTCTTCAAGTGTATAAACATCGCCTTGTACGCAT	252962	intronic antisense	NM_139084	Magi3	membrane associated guanylate kinase, WW and PDZ domain containing 3	-	225923273	226123408	19.1817	6.54205	4.25319	2.581	21.7436	18.8404	18.3389	17.8038	5	9.77484	5.88537	5.50799	4.25477	4.47406	3.97437	4.30955	2.62093	2.60541	2.48684	2.61082
ASRNV20030804	0.000125871	0.00585638	3.15708	up	noncoding	long noncoding	XR_590315	LOC102546538	RefSeq model	2434	chr1	+	127608331	127614272	GTGGGGCCTGCTACCAGGACGTCTCCACCACGATTGAACTATGAGCCGAAATGAACGCTT	102546538	intergenic							63.0661	20.4856	5.87717	4.21858	84.2197	48.9754	75.9809	43.0886	10.2632	29.1681	28.6813	13.8297	6.05163	5.91819	5.89041	5.64846	4.49953	4.0968	4.48774	3.79025
ASRNV20036494	8.96632e-05	0.00486966	3.14786	up	noncoding	long noncoding	XR_598484	LOC103694317	RefSeq model	3269	chr19	+	43424529	43427843	ACAAGTGAGCAAAGATTTCACAGAGTGGTGTTTGCCACTACATGCCTGTGTGTGTTTCTC	103694317	natural antisense	ENSRNOT00000015929	Zfp827	zinc finger protein 827	-	43282074	43457175	17.8335	5.11678	4.06446	2.41009	19.4658	10.8188	25.6727	15.3765	5	5.46711	5	5	4.09666	3.63519	4.43554	4.09047	2.62093	2.33803	2.3332	2.34821
ASRNV20036494	8.96632e-05	0.00486966	3.14786	up	noncoding	long noncoding	XR_598484	LOC103694317	RefSeq model	3269	chr19	+	43424529	43427843	ACAAGTGAGCAAAGATTTCACAGAGTGGTGTTTGCCACTACATGCCTGTGTGTGTTTCTC	103694317	natural antisense	ENSRNOT00000059838	Zfp827	zinc finger protein 827	-	43414236	43457175	17.8335	5.11678	4.06446	2.41009	19.4658	10.8188	25.6727	15.3765	5	5.46711	5	5	4.09666	3.63519	4.43554	4.09047	2.62093	2.33803	2.3332	2.34821
ASRNV20030948	0.00164128	0.0342812	3.11263	up	noncoding	long noncoding	XR_590485	LOC102551806	RefSeq model	792	chr1	-	205148436	205155172	AGCTTCTCTGGGTTGGCTGTGAAGTACACGAGGACAGTGTCAAGAGCTCAGTCTACACCG	102551806	intronic antisense	ENSRNOT00000072401	AABR06008867.1		+	205143699	205152686	25.209	7.48867	4.6108	2.97267	23.279	25.0693	33.9899	18.4978	5.99579	10.6376	6.64851	6.67278	4.35095	4.909	4.81683	4.36644	3.7501	2.71407	2.58301	2.84349
ASRNV20037045	3.61999e-05	0.00260212	3.08476	up	noncoding	long noncoding	XR_601148	LOC103695272	RefSeq model	5828	chr5	-	137138762	137144608	TCTTTTTGATATTAGATTTCACTTCCGGGGCTTCCACAGTTGCTAGAAGTGGCAGAGCAG	103695272	intronic antisense	ENSRNOT00000047522	Trabd2b	TraB domain containing 2B	+	137017121	137214659	17.3207	5.84919	4.10097	2.47581	20.0964	16.1926	15.1528	17.8409	5	6.95047	6.4463	5	4.14105	4.23824	3.71182	4.31277	2.62093	2.38133	2.55279	2.34821
ASRNV20036048	0.000215801	0.00827316	3.07588	up	noncoding	long noncoding	XR_597348	LOC103694391	RefSeq model	3806	chr20	-	9587369	9591289	ATTTAGGGGCTGGTTGTTGTCCCACGTGCCTTATAACTTCCTGTTAGCTCACATCTAACA	103694391	intron sense-overlapping	NM_001039607	LOC294154	similar to chromosome 6 open reading frame 106 isoform a	-	9533329	9599034	43.8929	15.0861	5.40137	3.78037	55.1196	32.5661	48.7113	39.1745	7.57379	20.4863	22.3155	9.96881	5.50967	5.29414	5.29316	5.50849	4.08023	3.58383	4.13055	3.32686
ASRNV20032216	7.7263e-06	0.00104558	3.02171	up	noncoding	long noncoding	XR_591977	LOC103692027	RefSeq model	4648	chr4	+	9184571	9189219	TTACAGCCCTGTCAGTGTTCTAATAGATTGTCTGATCGTCTAAAGCCATGCAGGTCTCTC	103692027	intron sense-overlapping	NM_001014186	Orc5	origin recognition complex, subunit 5	+	9162485	9226335	16.3578	5	4.00143	2.40606	16.7905	15.997	19.5921	13.0518	5	5	5	5	3.88269	4.22021	4.05932	3.84348	2.62093	2.32191	2.3332	2.34821
ASRNV20036676	9.84598e-05	0.00509579	3.0012	up	noncoding	long noncoding	XR_599439	LOC103694434	RefSeq model	1003	chr20	-	36193167	36196899	GTCTTGAGTGAACTAAGTATTGATCTCCATAGTCCTCGAAGTGGCCTAAGACAGCAGGAA	103694434	intergenic							16.0092	5	3.9916	2.40606	16.8199	16.9917	13.9826	16.2425	5	5	5	5	3.88491	4.31232	3.59766	4.17151	2.62093	2.32191	2.3332	2.34821
ASRNV20028417	0.000986374	0.0246392	3.00009	up	noncoding	long noncoding	XR_347159	LOC102547703	RefSeq model	6015	chr6	-	62067778	62076459	ATACATCAGCTTAATAAATCTGACACTGAGGAGGGGCAGTGTGTGTGGTTTCAATTACAG	102547703	intergenic							22.1693	6.77711	4.43897	2.85397	24.4305	18.6076	26.8125	18.8268	5.50564	8.54294	7.98122	5.07865	4.41494	4.4557	4.49351	4.39174	3.61864	2.4793	2.79569	2.52224
ASRNV20034697	7.30826e-05	0.00416557	2.99597	up	noncoding	long noncoding	XR_595076	LOC103693573	RefSeq model	4335	chr11	-	65076564	65131125	CTTTCTTAGTTGTATGGACTAAATAGTCATTCGTTCCTTGCAGCCTTTGTGCGGCATTTA	103693573	intergenic							16.0823	5.0172	3.98971	2.40668	14.5314	14.0741	17.0531	18.6704	5	5.0688	5	5	3.67647	4.02709	3.87537	4.37989	2.62093	2.32439	2.3332	2.34821
ASRNV20029139	0.00294146	0.0494836	2.98258	up	noncoding	long noncoding	XR_353558	LOC102548867	RefSeq model	1119	chr4	-	209589887	209595664	AAGCTAATGGACTAATTTAGAAACATGTGCTGTGTGTCTGTCCCAGTGTTGTGAGGAGCC	102548867	intergenic							144.539	42.5493	6.99732	5.42076	234.6	90.9074	150.734	101.916	34.5264	54.0517	45.7493	35.8698	7.41054	6.85374	6.8044	6.92059	6.29842	5.01178	5.15313	5.2197
ASRNV20032805	0.000200186	0.00784894	2.96709	up	noncoding	long noncoding	XR_592678	LOC102551042	RefSeq model	5746	chr5	-	130965772	130974918	AAGACAGTTTGCCTTGGGACCCTCAGAACCAGGGCATCTGCTCCAACACACATTCTGGGC	102551042	intronic antisense	ENSRNOT00000032433	Glis1	GLIS family zinc finger 1	+	130892705	131081379	16.0357	5	3.97511	2.40606	19.4739	13.9775	12.7521	17.9395	5	5	5	5	4.09736	4.01809	3.46438	4.32061	2.62093	2.32191	2.3332	2.34821
ASRNV20032805	0.000200186	0.00784894	2.96709	up	noncoding	long noncoding	XR_592678	LOC102551042	RefSeq model	5746	chr5	-	130965772	130974918	AAGACAGTTTGCCTTGGGACCCTCAGAACCAGGGCATCTGCTCCAACACACATTCTGGGC	102551042	intronic antisense	ENSRNOT00000075624	Glis1	GLIS family zinc finger 1	+	130892705	131081379	16.0357	5	3.97511	2.40606	19.4739	13.9775	12.7521	17.9395	5	5	5	5	4.09736	4.01809	3.46438	4.32061	2.62093	2.32191	2.3332	2.34821
ASRNV20029242	0.00229713	0.0425325	2.96408	up	noncoding	long noncoding	XR_354928	LOC102546646	RefSeq model	2224	chr6	-	109269992	109273425	ATCTAATACGAGGTTTCCTCTGATGCCCTGATTTCAAGGTATCCCAGAATTCAGTGCCTG	102546646	intergenic							21.6377	7.15018	4.42429	2.8567	24.6858	21.279	19.8248	20.7611	5.68231	10.4002	7.51824	5	4.42824	4.65134	4.07418	4.54338	3.6667	2.68919	2.7227	2.34821
ASRNV20030384	0.000340167	0.0115745	2.95782	up	noncoding	long noncoding	XR_589809	LOC103690083	RefSeq model	5845	chrX	-	137763017	137809707	AATAGGCAGCTAAACCTGCTTTTGCTAGCTGTAATCTTCCGCCATCGCTAAGAATCATGG	103690083	intergenic							16.4138	5.79566	4.0275	2.46296	14.2508	18.8092	15.0975	17.4978	5	7.20011	5.98254	5	3.64796	4.4723	3.70827	4.28146	2.62093	2.38769	2.49503	2.34821
ASRNV20029983	3.84376e-05	0.00272392	2.9541	up	noncoding	long noncoding	XR_589214	LOC102553975	RefSeq model	686	chr9	-	42463030	42466534	ACAGCAGACCAACCTCCCATGGTATTTACAGCTTTGAAACAGCAGAGAAACAGATCTGCA	102553975	intergenic							19.4082	7.27149	4.24608	2.68336	24.9742	19.2381	18.2689	15.1515	5	10.345	8.36978	5.37118	4.4412	4.50342	3.97005	4.06966	2.62093	2.68174	2.85022	2.58057
ASRNV20009227	0.000175442	0.00720637	2.94115	up	noncoding	pseudogene	ENSRNOT00000076911	Rn50_1_1739.1	Ensembl	1261	chr1	+	173840322	173841583	AGAACACTGAGAACAAGAAAGAGACCTTTGGTTGCTGAGGAGTCCCTGTCCAAACTTAGA		intergenic							36.9291	13.1365	5.18856	3.63218	42.2766	35.5418	36.7032	33.195	7.35935	21.3925	11.9289	11.8655	5.1478	5.42992	4.91344	5.26308	4.03512	3.64779	3.28281	3.56301
ASRNV20029149	0.000798273	0.021089	2.89056	up	noncoding	long noncoding	XR_353766	LOC102553163	RefSeq model	1078	chr4	-	244980127	244990072	TCAAAGAAAGGATACCACTAAGTACAACTTGTTCTCTGTCATGTCACGATGCAGCCAAAC	102553163	intergenic							16.5392	5	3.93741	2.40606	13.5383	9.80486	26.1893	16.6245	5	5	5	5	3.57934	3.50103	4.45992	4.20935	2.62093	2.32191	2.3332	2.34821
ASRNV20034623	0.000981723	0.0246049	2.87895	up	noncoding	long noncoding	XR_594986	LOC103693508	RefSeq model	1577	chr11	+	19781629	19801357	GAACTTGAGTACGATGTATTTGCCCTCCTTGCAACCTTCTCAAAATAGAACCACTTCCTC	103693508	intergenic							55.1229	19.2985	5.75765	4.2321	61.2862	47.8888	60.8095	50.507	13.8775	27.84	17.8244	17.6523	5.65522	5.88234	5.60085	5.89218	4.92836	4.02928	3.80563	4.16513
ASRNV20030981	0.000107915	0.00533045	2.8666	up	noncoding	long noncoding	XR_590524	LOC102551753	RefSeq model	919	chr1	-	214506008	214507363	TGTCTTGTTGCTTCCAGGTCACTAAATCTCAGACCCCTAAACCAATAGAAGGGCCTTTGT	102551753	intergenic							15.4204	5.41513	3.93834	2.41899	14.6343	16.1103	14.5678	16.369	5	6.66053	5	5	3.68503	4.23016	3.65475	4.18341	2.62093	2.37364	2.3332	2.34821
ASRNV20035280	0.00176981	0.0359844	2.85861	up	noncoding	long noncoding	XR_596397	LOC103693908	RefSeq model	1153	chr16	+	14248748	14254215	TAATGAAAAGGAGAGGTTTGACTCCCTTCAAGGAGCTTCTCCCTAGGGCGCCTGGGGAAG	103693908	natural antisense	NM_053572	Cdhr1	cadherin-related family member 1	-	14230681	14250567	45.3572	16.4889	5.47344	3.95813	51.6804	44.2787	48.48	36.9895	11.5987	27.8103	13.7507	12.796	5.42375	5.75781	5.28836	5.42386	4.67296	4.028	3.45547	3.6761
ASRNV20030662	2.31873e-06	0.000600029	2.85688	up	noncoding	long noncoding	XR_590149	Acpt	RefSeq model	1970	chr1	-	101291932	101299652	GAACTGCCTTAAGCAACTCTACCCCGGCATTACTTCCTACTGGTAGCAGAGCAGATGGAG	308569	exon sense-overlapping	ENSRNOT00000032200	Acpt		-	101292688	101299618	15.334	5	3.9205	2.40606	16.2386	13.0557	17.0082	15.0335	5	5	5	5	3.83263	3.92042	3.87086	4.05809	2.62093	2.32191	2.3332	2.34821
ASRNV20030662	2.31873e-06	0.000600029	2.85688	up	noncoding	long noncoding	XR_590149	Acpt	RefSeq model	1970	chr1	-	101291932	101299652	GAACTGCCTTAAGCAACTCTACCCCGGCATTACTTCCTACTGGTAGCAGAGCAGATGGAG	308569	exon sense-overlapping	NM_001107510	Acpt	acid phosphatase, DPNicular	-	101292688	101296571	15.334	5	3.9205	2.40606	16.2386	13.0557	17.0082	15.0335	5	5	5	5	3.83263	3.92042	3.87086	4.05809	2.62093	2.32191	2.3332	2.34821
ASRNV20026941	2.70594e-05	0.00217125	2.85421	up	noncoding	long noncoding	XR_338432	LOC102554394	RefSeq model	10236	chr10	-	4974234	4986563	ACATGTGTATACACACATATAAAGGCCAAAAGTTGACACTGAATGCCTTCCTCAGTTGCC	102554394	intergenic							15.3222	5	3.91915	2.40606	18.4256	14.744	13.9263	14.1928	5	5	5	5	4.0207	4.09245	3.59372	3.96975	2.62093	2.32191	2.3332	2.34821
ASRNV20030152	5.11416e-05	0.00332935	2.84527	up	noncoding	long noncoding	XR_589429	LOC102551957	RefSeq model	820	chr1	-	117875978	118137241	CTCTGATGTCTTGCAGTCATCTGGCATCTCCCCTGCAGTCCAGTGGATCACTATTCCCAG	102551957	intron sense-overlapping	ENSRNOT00000035149	AABR06005415.1		-	118076157	118076730	467.368	155.197	8.70367	7.19511	638.076	397.527	538.192	295.676	65.369	255.918	170.856	128.645	8.66815	9.09646	8.54487	8.5052	7.28949	7.28616	7.04368	7.16109
ASRNV20030152	5.11416e-05	0.00332935	2.84527	up	noncoding	long noncoding	XR_589429	LOC102551957	RefSeq model	820	chr1	-	117875978	118137241	CTCTGATGTCTTGCAGTCATCTGGCATCTCCCCTGCAGTCCAGTGGATCACTATTCCCAG	102551957	intronic antisense	ENSRNOT00000036807	Vom2r25		+	118027413	118043101	467.368	155.197	8.70367	7.19511	638.076	397.527	538.192	295.676	65.369	255.918	170.856	128.645	8.66815	9.09646	8.54487	8.5052	7.28949	7.28616	7.04368	7.16109
ASRNV20030152	5.11416e-05	0.00332935	2.84527	up	noncoding	long noncoding	XR_589429	LOC102551957	RefSeq model	820	chr1	-	117875978	118137241	CTCTGATGTCTTGCAGTCATCTGGCATCTCCCCTGCAGTCCAGTGGATCACTATTCCCAG	102551957	intronic antisense	ENSRNOT00000048018	Vom2r25		+	118027407	118043080	467.368	155.197	8.70367	7.19511	638.076	397.527	538.192	295.676	65.369	255.918	170.856	128.645	8.66815	9.09646	8.54487	8.5052	7.28949	7.28616	7.04368	7.16109
ASRNV20030152	5.11416e-05	0.00332935	2.84527	up	noncoding	long noncoding	XR_589429	LOC102551957	RefSeq model	820	chr1	-	117875978	118137241	CTCTGATGTCTTGCAGTCATCTGGCATCTCCCCTGCAGTCCAGTGGATCACTATTCCCAG	102551957	intronic antisense	ENSRNOT00000075203	Vom2r25		+	118027392	118043080	467.368	155.197	8.70367	7.19511	638.076	397.527	538.192	295.676	65.369	255.918	170.856	128.645	8.66815	9.09646	8.54487	8.5052	7.28949	7.28616	7.04368	7.16109
ASRNV20035313	2.09839e-06	0.000587039	2.84146	up	noncoding	long noncoding	XR_596435	LOC103693937	RefSeq model	1143	chr16	+	31909886	31920080	GTGCTATCTCTCAAGGAACCCTGCTGATCCGTGGTTGAAAATACTATAGATAAATTTTAT	103693937	natural antisense	NM_198764	Sh3rf1	SH3 domain containing ring finger 1	-	31900566	32060681	15.3746	5	3.91269	2.40606	18.5695	13.1602	16.8581	12.9108	5	5	5	5	4.03353	3.93174	3.85747	3.82804	2.62093	2.32191	2.3332	2.34821
ASRNV20036364	7.17348e-05	0.00416557	2.82893	up	noncoding	long noncoding	XR_598020	LOC103694032	RefSeq model	2026	chr17	-	10243828	10248979	TTCCAGAAGACTGTTCATACGTGTTAGTTGAATCCATTTTCCTTCTGATTCTTTGAAAAC	103694032	intergenic							15.1181	5	3.90632	2.40606	16.2007	15.1043	13.5025	15.6651	5	5	5	5	3.82945	4.13036	3.54782	4.11763	2.62093	2.32191	2.3332	2.34821
ASRNV20030570	0.000132467	0.00598516	2.81638	up	noncoding	long noncoding	XR_590040	Zfp551	RefSeq model	2781	chr1	+	67682375	67696314	ATCCCATTTGGTTTGGAAAGAGAATTGAAAATACTCTGCATGCCTTCACCACAGTTTTTC	682964	exon sense-overlapping	ENSRNOT00000074063	Zfp551	zinc finger protein 551	+	67682618	67689655	15.1716	5	3.8999	2.40606	18.6687	15.6752	12.7214	13.621	5	5	5	5	4.0389	4.19059	3.46065	3.90947	2.62093	2.32191	2.3332	2.34821
ASRNV20029296	8.53592e-05	0.00472488	2.80384	up	noncoding	long noncoding	XR_355877	LOC102550959	RefSeq model	1223	chr7	+	125510437	125513300	TGCTCCGGCTTTTTATCCAAGTTGCCAAATTGTTGCCCTTTGACAATGCTAGCAGAACAG	102550959	bidirectional	NM_001004242	Arhgap8	Rho GTPase activating protein 8	-	125451429	125510336	15.1204	5.57667	3.91057	2.42317	15.0035	16.0979	14.156	15.224	5	7.30667	5	5	3.72416	4.22868	3.61473	4.07472	2.62093	2.39034	2.3332	2.34821
ASRNV20032990	1.8238e-05	0.00177584	2.79149	up	noncoding	long noncoding	XR_592885	LOC102550312	RefSeq model	2202	chr6	-	23406242	23417864	TAGACTCCCTCTGATTTGTGCTGAAAGATTACAAAATGACAGCAACTTGGTCAAATGCAA	102550312	intergenic							15.9573	5.10787	3.94812	2.46709	20.4356	13.5607	17.8115	12.0212	5	5	5	5.43149	4.16264	3.97338	3.93401	3.72246	2.62093	2.32191	2.3332	2.59232
ASRNV20031029	0.00223427	0.0418658	2.79081	up	noncoding	long noncoding	XR_590578	LOC103691282	RefSeq model	941	chr12	+	23768225	23769734	GGTAACTATATAGCTGGACACGGCAACAGCACACCAACCTCCATATTCAAGTTTCTTCAG	103691282	natural antisense	ENSRNOT00000059592	Tsc22d4		-	23769500	23781160	24.8374	8.49789	4.57247	3.09179	36.404	20.7948	18.4587	23.6922	5.61053	13.583	7.17809	7.61992	4.94653	4.61427	3.98454	4.74455	3.64973	3.04468	2.67374	2.99899
ASRNV20031029	0.00223427	0.0418658	2.79081	up	noncoding	long noncoding	XR_590578	LOC103691282	RefSeq model	941	chr12	+	23768225	23769734	GGTAACTATATAGCTGGACACGGCAACAGCACACCAACCTCCATATTCAAGTTTCTTCAG	103691282	natural antisense	NM_001044284	Tsc22d4	TSC22 domain family, member 4	-	23769469	23782328	24.8374	8.49789	4.57247	3.09179	36.404	20.7948	18.4587	23.6922	5.61053	13.583	7.17809	7.61992	4.94653	4.61427	3.98454	4.74455	3.64973	3.04468	2.67374	2.99899
ASRNV20033771	0.000381012	0.0125202	2.78177	up	noncoding	long noncoding	XR_593769	LOC103693011	RefSeq model	1649	chr8	-	11719156	11798702	AATCTCTCTGGGTTAAAAATAGAAAGTGTTGCCATCAGCCATCAATTAGTGCTCGAGTGC	103693011	intergenic							15.0165	5	3.88206	2.40606	19.3189	14.6743	11.0661	15.0066	5	5	5	5	4.08608	4.08638	3.30071	4.05509	2.62093	2.32191	2.3332	2.34821
ASRNV20031350	0.000761874	0.0204675	2.78173	up	noncoding	long noncoding	XR_590955	LOC102553625	RefSeq model	657	chr2	-	89402282	89451908	TCTCTCTACTATTTACTTAAGTTCTCCCAATGAGCTACTATTGTGGCTGAGATTGGTAAT	102553625	intergenic							15.8534	5.136	3.88671	2.41072	24.9981	14.1401	14.5184	9.75689	5	5.544	5	5	4.44293	4.03411	3.64973	3.42005	2.62093	2.34055	2.3332	2.34821
ASRNV20028432	1.24697e-05	0.00137605	2.76938	up	noncoding	long noncoding	XR_347234	LOC102548461	RefSeq model	1038	chr6	+	85223153	85237667	AGGATGGAAGAGAATTGACTCTGCTTCCCATTTGTAGGCTAAGATCCTGGAGATTCACTG	102548461	intergenic							15.7221	5.52794	3.94358	2.47402	19.9866	12.4633	15.7568	14.6816	5	5.41404	6.69771	5	4.13417	3.85229	3.76634	4.02153	2.62093	2.33628	2.59067	2.34821
ASRNV20035058	0.000351578	0.0118928	2.7659	up	noncoding	long noncoding	XR_595906	LOC102555192	RefSeq model	865	chr14	-	88290319	88319990	GCTTCTGTATAAAGAACTGAGTACGGCTCTCTCCGTATAGCCCCACCTGGCAGCCATCGC	102555192	intergenic							38.6628	14.3592	5.25528	3.78753	41.5309	36.1331	41.9584	35.0286	8.80155	21.0113	13.4193	14.2045	5.1228	5.45679	5.09372	5.34779	4.27569	3.61881	3.4252	3.83041
ASRNV20030842	0.000110067	0.00537407	2.73752	up	noncoding	long noncoding	XR_590370	LOC102553298	RefSeq model	3940	chr1	+	147611213	147632736	TGGATTTCCCCAAACAGAGATCAAACTGATTAATGCTCATGGTCAGCCCTGATTCGGGTT	102553298	intergenic							15.0742	5.61018	3.87717	2.4243	12.7938	12.0229	19.1368	16.3432	5	7.44072	5	5	3.50051	3.79702	4.02994	4.18121	2.62093	2.39487	2.3332	2.34821
ASRNV20027943	0.000128417	0.00591125	2.73564	up	noncoding	long noncoding	XR_344281	LOC102555118	RefSeq model	2809	chr2	+	132438809	132449496	GAGAAAAGTGTGCATGATCCCCAGACATACAAGTACATAAAATAGAAGTACAAATCAAAC	102555118	intergenic							14.8391	5	3.85794	2.40606	18.5556	15.6978	14.1018	11.0011	5	5	5	5	4.03291	4.19318	3.60971	3.59596	2.62093	2.32191	2.3332	2.34821
ASRNV20034039	0.00250033	0.0445454	2.71587	up	noncoding	long noncoding	XR_594136	Arpp21	RefSeq model	7637	chr8	-	119670549	119817635	TGGAGTATTCTTCAATGATCTTCAATTGATCTTCATTGAGGCAGGGTCTTTCAGTTGAAC	363153	exon sense-overlapping	NM_001135045	Arpp21	cAMP regulated phosphoprotein 21	-	119663717	119785747	16.6609	6.9367	4.00749	2.56608	23.7045	16.2685	10.8415	15.8293	5	12.7468	5	5	4.37382	4.24702	3.27531	4.13384	2.62093	2.96199	2.3332	2.34821
ASRNV20034039	0.00250033	0.0445454	2.71587	up	noncoding	long noncoding	XR_594136	Arpp21	RefSeq model	7637	chr8	-	119670549	119817635	TGGAGTATTCTTCAATGATCTTCAATTGATCTTCATTGAGGCAGGGTCTTTCAGTTGAAC	363153	exon sense-overlapping	NM_001135046	Arpp21	cAMP regulated phosphoprotein 21	-	119779211	119785747	16.6609	6.9367	4.00749	2.56608	23.7045	16.2685	10.8415	15.8293	5	12.7468	5	5	4.37382	4.24702	3.27531	4.13384	2.62093	2.96199	2.3332	2.34821
ASRNV20027533	7.87894e-06	0.00104558	2.7098	up	noncoding	long noncoding	XR_341886	LOC102546966	RefSeq model	1840	chr18	+	40295180	40309881	TTATTTGCTTGTTTGTTTGCATGCCTCTGCATGTGCTTATGTCATGTGCAAACGTGCATA	102546966	intergenic							16.669	6.94322	4.02281	2.58462	20.6146	13.2884	18.4377	14.3354	5	11.0121	6.7608	5	4.17797	3.94553	3.98306	3.98468	2.62093	2.76888	2.60047	2.34821
ASRNV20033818	0.000763255	0.0204675	2.68832	up	noncoding	long noncoding	XR_593826	LOC103693044	RefSeq model	324	chr8	-	40155977	40164272	CAATGAACCCTCACAGACCCAGCAAGCGTAAACCGAATCAGAAATAAAGATGGAATAATA	103693044	intergenic							15.9198	6.36241	3.96816	2.54145	19.45	17.6319	11.6108	14.9867	5	10.3331	5	5.11654	4.09531	4.36616	3.35978	4.05138	2.62093	2.68092	2.3332	2.53077
ASRNV20004229	0.000168055	0.00695815	2.68127	up	noncoding	pseudogene	ENSRNOT00000045619	AABR06047475.1	Ensembl	933	chr7	-	7636797	7637736	TATTTCCTTTGTAATTTCTCCTTTGAAATTATTTTCACCAGTGTTTCCATTCCCAGATTT		exon sense-overlapping	NM_001000074	Olr952	olfactory receptor 952	-	7636797	7637736	14.2952	5	3.82898	2.40606	13.0455	15.0677	13.9172	15.1504	5	5	5	5	3.52777	4.12607	3.59281	4.06927	2.62093	2.32191	2.3332	2.34821
ASRNV20034202	0.00270232	0.0467754	2.66475	up	noncoding	long noncoding	XR_594470	LOC102548729	RefSeq model	1671	chr9	-	93198515	93203713	TGGAATGTCCTGCCAAGTCTCAGAGGTCCTCCAAAGTGCAGATAAATCAGATGCTGAAAT	102548729	intergenic							19.1208	6.44858	4.24738	2.83338	21.6984	19.4593	18.1753	17.1501	5.34724	7.68547	6.07735	6.68426	4.25309	4.52078	3.96095	4.25468	3.5756	2.40653	2.50495	2.84641
ASRNV20036087	0.000107269	0.00533045	2.65441	up	noncoding	long noncoding	XR_597390	LOC103694408	RefSeq model	2352	chr20	-	23956774	23959188	CTTTCTTGGTTGTATCATCAGCGCTTTCCTGACACAGGTGGGCCTTATTAGAAAACCAAG	103694408	intronic antisense	NM_001107624	Arid5b	AT-rich interaction domain 5B	+	23665741	23979982	14.2175	5	3.81445	2.40606	14.2577	12.2627	13.7908	16.5589	5	5	5	5	3.6485	3.82675	3.57948	4.20307	2.62093	2.32191	2.3332	2.34821
ASRNV20033328	0.000706612	0.0195565	2.65268	up	noncoding	long noncoding	XR_593277	LOC102549402	RefSeq model	289	chr7	+	13915004	13919476	GAGTCGTTTGAGAAGATGCTACGATGAAAACTAATGTTTGTATGCTTCCAGAAATGTAAT	102549402	natural antisense	ENSRNOT00000009931	Slc1a6		-	13893841	13915011	573.157	187.478	8.94368	7.53623	652.769	316.711	885.903	437.248	96.0958	291.642	173.418	188.758	8.70171	8.767	9.2561	9.04991	7.88594	7.46386	7.06417	7.73094
ASRNV20033328	0.000706612	0.0195565	2.65268	up	noncoding	long noncoding	XR_593277	LOC102549402	RefSeq model	289	chr7	+	13915004	13919476	GAGTCGTTTGAGAAGATGCTACGATGAAAACTAATGTTTGTATGCTTCCAGAAATGTAAT	102549402	natural antisense	NM_032065	Slc1a6	solute carrier family 1 member 6	-	13893840	13921826	573.157	187.478	8.94368	7.53623	652.769	316.711	885.903	437.248	96.0958	291.642	173.418	188.758	8.70171	8.767	9.2561	9.04991	7.88594	7.46386	7.06417	7.73094
ASRNV20034498	2.80828e-06	0.000666215	2.61945	up	noncoding	long noncoding	XR_594844	LOC102554532	RefSeq model	1610	chr10	-	74746210	74750026	GTCTGACTTGTGTGTTGCAGGAATTGAAGAATGTACTAAAAGACTAAAATATTTCGTCTC	102554532	intergenic							376.188	134.998	8.34912	6.95986	494.616	222.123	531.014	256.999	49.3917	213.904	154.779	121.918	8.33701	8.23575	8.52719	8.29653	6.84534	7.01381	6.89957	7.08071
ASRNV20003737	0.00160719	0.0340436	2.61368	up	noncoding	pseudogene	ENSRNOT00000041783	AABR06051560.1	Ensembl	1044	chr7	+	107202696	107203744	CCAAGATGTTCTGTGCTGCCTGCATGTGAGCTGGGAAGAGGCCTGTCTGTCAGTCTGCTT		intergenic							75.269	28.2163	6.16596	4.77987	93.1802	55.2265	80.3859	72.2833	20.0472	36.6626	34.1188	22.0364	6.19277	6.10224	5.97118	6.39763	5.46812	4.43054	4.73375	4.48708
ASRNV20031009	0.0005731	0.0168527	2.58286	up	noncoding	long noncoding	XR_590555	LOC102549619	RefSeq model	2729	chr1	-	222802661	222849260	TTCTCCCACTGCGGCAAGACAAGGCAGCCCTGTACTACATATGTGCTCAGGAGCTCAGAC	102549619	intergenic							32.2037	12.8724	4.95792	3.58896	44.7145	27.286	31.0586	25.7556	7.37389	21.8372	12.5415	9.73722	5.22989	5.03232	4.69136	4.87813	4.0389	3.6778	3.3421	3.29703
ASRNV20030144	5.29258e-06	0.00086527	2.56231	up	noncoding	long noncoding	XR_589412	LOC103690621	RefSeq model	712	chr11	-	84809742	84814703	TCCCGGATGGATCCTAGGGTAACTGGCATTCTGTTGGTTCTCATTTTATATTAAAGAAAT	103690621	intergenic							14.0506	5.18975	3.76988	2.41244	15.5138	10.7749	17.4952	12.4185	5	5.75901	5	5	3.76814	3.63106	3.9093	3.77104	2.62093	2.34741	2.3332	2.34821
ASRNV20028974	0.000375673	0.0124236	2.55219	up	noncoding	long noncoding	XR_351236	LOC102555389	RefSeq model	1261	chr2	-	2609942	2611364	GTTGTTCCAGTAACAGCACTGCCCTAATGGTTCTGTTGAAGGTAACGGCTTGCTAAATAA	102555389	intronic antisense	NM_022278	Glrx	glutaredoxin	+	2604478	2614391	14.9915	6.19255	3.82851	2.47677	23.0648	11.1442	13.8061	11.9508	5	9.77018	5	5	4.33658	3.6816	3.58102	3.71484	2.62093	2.60475	2.3332	2.34821
ASRNV20032009	8.89864e-05	0.00486966	2.54824	up	noncoding	long noncoding	XR_591717	LOC102548513	RefSeq model	4526	chr3	+	141112244	141122905	CTGGGAATAGCCTTTGTCTTGGTTGTGGAGATGAATCACTAATAAGAAAGAATAGAAAAT	102548513	intergenic							14.0014	5	3.75556	2.40606	18.0038	12.7176	15.6457	9.63835	5	5	5	5	3.98357	3.87965	3.75691	3.40212	2.62093	2.32191	2.3332	2.34821
ASRNV20028673	2.2155e-05	0.00196006	2.54452	up	noncoding	long noncoding	XR_348659	LOC102557561	RefSeq model	778	chr8	+	91614680	91638927	GTGCTGCCACAAAACTCTTTTACAAGAGCAAAAGCAATACTTATGACTTCTGCCACCACC	102557561	intergenic							13.7665	5.22813	3.76102	2.41362	16.5658	12.3626	12.9867	13.1508	5	5.91253	5	5	3.85825	3.83889	3.48967	3.85727	2.62093	2.35216	2.3332	2.34821
ASRNV20034651	0.00162674	0.034155	2.536	up	noncoding	long noncoding	XR_595015	LOC103693521	RefSeq model	1095	chr11	+	38011827	38013009	AAAGCTGGCTGTGGTCTGCAGGAACTAACATATGTGTTTTCCAGCTCAGTGACATTAGCA	103693521	intronic antisense	ENSRNOT00000002291	Hlcs	holocarboxylase synthetase	-	37947327	38086632	16.8412	7.33668	3.99652	2.65397	22.4733	10.2818	19.3678	15.242	5	8.09942	11.2473	5	4.30168	3.56367	4.04434	4.07641	2.62093	2.4399	3.20684	2.34821
ASRNV20036410	0.000223299	0.00846763	2.53535	up	noncoding	long noncoding	XR_598132	LOC102556138	RefSeq model	9380	chr17	+	36403697	36427949	GCTTCCAACAGATTGGCTTGTGGGCATGTTTGTGAAGCAGGACCTGCTGTCTCACAGCAG	102556138	intergenic							14.0928	5.11267	3.80046	2.45828	17.0392	13.9991	11.4715	13.8614	5	5.23951	5	5.21119	3.90198	4.01961	3.34607	3.93418	2.62093	2.33037	2.3332	2.54861
ASRNV20037257	9.33593e-05	0.00495571	2.4898	up	noncoding	long noncoding	XR_602103	LOC102550292	RefSeq model	4947	chr8	+	50165718	50181826	GGGCTTCTGCGTAATGATTGCCTTTCCCAATAATGTGGAATATAGCTAACGGTGTACTTA	102550292	intergenic							13.5068	5	3.72209	2.40606	14.9867	9.56481	14.4489	15.0269	5	5	5	5	3.72145	3.46636	3.64324	4.05731	2.62093	2.32191	2.3332	2.34821
ASRNV20031677	0.00220994	0.0416669	2.46417	up	noncoding	long noncoding	XR_591337	LOC103691705	RefSeq model	3664	chr2	-	254073730	254083309	CAAGTAAAACATAGTCATGAAGGGTCTCCTGGCTGTTCCTCTGGCTACAGTTAATAGGTC	103691705	intergenic							171.865	65.5509	7.24947	5.94837	293.388	131.909	144.672	117.49	36.0204	107.467	70.6968	48.0189	7.68472	7.43717	6.74993	7.12608	6.36247	6.002	5.77034	5.65868
ASRNV20029644	1.24962e-05	0.00137605	2.45341	up	noncoding	pseudogene	XR_360376	LOC100909791	RefSeq model	2928	chr16	+	18324308	18335597	GGAGCAGAGAAAAGTCCTTGCATGGTTTCTTCTGATTGTCCGCAATCCCTTTGTCTTTAC	100909791	exon sense-overlapping	ENSRNOT00000075027	Fam60a		+	18319806	18335595	13.1497	5	3.70085	2.40606	13.8314	12.9061	14.5882	11.2733	5	5	5	5	3.6072	3.904	3.65726	3.63494	2.62093	2.32191	2.3332	2.34821
ASRNV20029644	1.24962e-05	0.00137605	2.45341	up	noncoding	pseudogene	XR_360376	LOC100909791	RefSeq model	2928	chr16	+	18324308	18335597	GGAGCAGAGAAAAGTCCTTGCATGGTTTCTTCTGATTGTCCGCAATCCCTTTGTCTTTAC	100909791	exon sense-overlapping	NM_001134711	Fam60a	family with sequence similarity 60, member A	+	18319806	18335597	13.1497	5	3.70085	2.40606	13.8314	12.9061	14.5882	11.2733	5	5	5	5	3.6072	3.904	3.65726	3.63494	2.62093	2.32191	2.3332	2.34821
ASRNV20029644	1.24962e-05	0.00137605	2.45341	up	noncoding	pseudogene	XR_360376	LOC100909791	RefSeq model	2928	chr16	+	18324308	18335597	GGAGCAGAGAAAAGTCCTTGCATGGTTTCTTCTGATTGTCCGCAATCCCTTTGTCTTTAC	100909791	exon sense-overlapping	NM_001134712	Fam60a	family with sequence similarity 60, member A	+	18319715	18335597	13.1497	5	3.70085	2.40606	13.8314	12.9061	14.5882	11.2733	5	5	5	5	3.6072	3.904	3.65726	3.63494	2.62093	2.32191	2.3332	2.34821
ASRNV20032627	0.00137605	0.0310993	2.44992	up	noncoding	long noncoding	XR_592469	LOC103692331	RefSeq model	1197	chr5	+	53928365	53962403	CATGTTGTACCTTTCTCACCACAATAGCCTCTATTCTTCTGTAGCTGTATGCCAAAGTAA	103692331	intergenic							168.719	64.7204	7.23784	5.94511	224.7	91.9697	202.747	155.461	35.7133	84.1687	91.8292	47.1703	7.35445	6.87324	7.17957	7.54411	6.35151	5.6474	6.15075	5.63079
ASRNV20026758	0.00152755	0.0331482	2.37353	up	noncoding	long noncoding	NR_132624	LOC103692944	RefSeq	1161	chr7	-	119765618	119768683	AGATGACCTTGAGGCACTTTTTCCTACCATTCAGATAGACGTATTGATTGGCTTCTTTTT	103692944	intergenic							12.8052	5	3.65309	2.40606	8.76627	12.1695	15.805	14.4801	5	5	5	5	3.02395	3.81625	3.77207	4.00009	2.62093	2.32191	2.3332	2.34821
ASRNV20030633	0.000164683	0.00684591	2.36445	up	noncoding	long noncoding	XR_590113	Zfp27	RefSeq model	6977	chr1	-	88948148	88965435	TGGACTTCAACCCTGGAAGCTACATCATTGGCCCCAGAAGATCCTGGGAGCTCCAGTGAG	100362022	exon sense-overlapping	ENSRNOT00000037288	LOC100366140		-	88952860	88954537	12.84	5.6249	3.66663	2.42512	14.6298	14.0235	11.8867	10.82	5	7.4996	5	5	3.68483	4.02271	3.38662	3.57234	2.62093	2.39816	2.3332	2.34821
ASRNV20030633	0.000164683	0.00684591	2.36445	up	noncoding	long noncoding	XR_590113	Zfp27	RefSeq model	6977	chr1	-	88948148	88965435	TGGACTTCAACCCTGGAAGCTACATCATTGGCCCCAGAAGATCCTGGGAGCTCCAGTGAG	100362022	exon sense-overlapping	ENSRNOT00000074090	LOC100366140		-	88952965	88954228	12.84	5.6249	3.66663	2.42512	14.6298	14.0235	11.8867	10.82	5	7.4996	5	5	3.68483	4.02271	3.38662	3.57234	2.62093	2.39816	2.3332	2.34821
ASRNV20029112	0.000864741	0.0226034	2.36264	up	noncoding	long noncoding	XR_352968	Dnajc5	RefSeq model	4316	chr3	+	180723472	180757442	TATCATTGGAGGCATGTCTCTTGCTGTGGTGTGTGGGAAATCATTTGTCTCTGTTCTGCA	79130	exon sense-overlapping	NM_024161	Dnajc5	DnaJ heat shock protein family (Hsp40) member C5	+	180723886	180754185	125.932	49.1674	6.75202	5.51162	145.8	70.2457	206.152	81.53	24.4894	72.8617	63.3117	36.0068	6.77871	6.45435	7.19962	6.57541	5.77958	5.42748	5.61384	5.22559
ASRNV20029214	0.00176532	0.0359701	2.3539	up	noncoding	long noncoding	XR_354555	LOC102549671	RefSeq model	930	chr6	-	22545939	22557061	GCAAATGTGATCCCGCTTCTTTCTCCAGAATAGATTTGTTTATGGAAGGATGGGAATCTC	102549671	intergenic							12.7484	5.34613	3.65214	2.41709	15.8477	13.2653	8.60714	13.2735	5	6.38452	5	5	3.79864	3.94224	2.99474	3.87294	2.62093	2.36601	2.3332	2.34821
ASRNV20000765	5.17031e-05	0.00334487	2.33774	up	noncoding	pseudogene	ENSRNOT00000009588	AABR06036367.1	Ensembl	366	chr5	+	52789946	52790314	GACAGCGTTCAGTGCTTTGTGTACAATACAGCCACCTATGCACCCAAATGGCTGTTATAA		intergenic							15.2384	7.16041	3.87413	2.64902	19.627	11.364	17.737	12.2257	5	11.9898	6.52497	5.12688	4.10656	3.71275	3.92897	3.74826	2.62093	2.87841	2.56414	2.53259
ASRNV20027251	0.000771097	0.0206244	2.32602	up	noncoding	long noncoding	XR_340222	LOC102551686	RefSeq model	2954	chr14	-	33098869	33105004	CCCATGCCTACAAGGCTTTCTCTCTCAGTAGCTTCATCGTAGTTTTATTGTTGTTACTGT	102551686	intergenic							12.385	5	3.62392	2.40606	10.2701	12.4782	12.3699	14.4217	5	5	5	5	3.21914	3.85408	3.42822	3.99424	2.62093	2.32191	2.3332	2.34821
ASRNV20032031	0.000965689	0.0243889	2.31556	up	noncoding	long noncoding	XR_591741	LOC102548647	RefSeq model	1274	chr13	+	60977913	60982939	GTTTCAGTAACACTTGCTTTTTAAAATCCCGCATTCCTACTTGCTTTTCTAAAGGCTGCC	102548647	intergenic							12.2883	5	3.61742	2.40606	10.2263	13.2681	11.7889	13.8697	5	5	5	5	3.21393	3.94275	3.37743	3.93556	2.62093	2.32191	2.3332	2.34821
ASRNV20036029	0.0027402	0.04714	2.30936	up	noncoding	long noncoding	XR_597328	RT1-T24-3	RefSeq model	2407	chr20	+	5324178	5355420	TGAAGGGACGGTGCTGTGCTCCTGAAGAATGTTGTTTGTTGAAACAACAGGCGTAAAACA	414788	exon sense-overlapping	NM_001166403	RT1-T24-3	RT1 class I, locus T24, gene 3	+	5324556	5331860	60.1966	25.565	5.78904	4.58154	45.2561	40.4976	98.7445	56.2882	12.6609	33.3942	33.7182	22.4869	5.2469	5.62807	6.2338	6.04738	4.79297	4.297	4.71602	4.52019
ASRNV20036029	0.0027402	0.04714	2.30936	up	noncoding	long noncoding	XR_597328	RT1-T24-3	RefSeq model	2407	chr20	+	5324178	5355420	TGAAGGGACGGTGCTGTGCTCCTGAAGAATGTTGTTTGTTGAAACAACAGGCGTAAAACA	414788	intron sense-overlapping	ENSRNOT00000061299	AABR06099817.1		+	5344904	5347354	60.1966	25.565	5.78904	4.58154	45.2561	40.4976	98.7445	56.2882	12.6609	33.3942	33.7182	22.4869	5.2469	5.62807	6.2338	6.04738	4.79297	4.297	4.71602	4.52019
ASRNV20001091	0.0026895	0.0467355	2.30587	up	noncoding	long noncoding	ENSRNOT00000013838	Fam25a	Ensembl	337	chr16	-	9020773	9033706	GAGGGAGTTAGTCACTCACACCATCACTGATGCCGTTACCCACGCTGCAGAAGGCCTGGG	684972	exon sense-overlapping	NM_001134849	Fam25a	family with sequence similarity 25, member A	-	9020711	9033706	25.5839	10.9111	4.64237	3.43706	33.4871	23.9364	22.7273	22.1849	7.07093	15.1234	9.99311	11.4571	4.82927	4.83406	4.26095	4.64522	3.98475	3.18686	3.06495	3.51169
ASRNV20001091	0.0026895	0.0467355	2.30587	up	noncoding	long noncoding	ENSRNOT00000013838	Fam25a	Ensembl	337	chr16	-	9020773	9033706	GAGGGAGTTAGTCACTCACACCATCACTGATGCCGTTACCCACGCTGCAGAAGGCCTGGG	684972	intron sense-overlapping	NM_001170593	Chat	choline O-acetyltransferase	-	8493024	10652313	25.5839	10.9111	4.64237	3.43706	33.4871	23.9364	22.7273	22.1849	7.07093	15.1234	9.99311	11.4571	4.82927	4.83406	4.26095	4.64522	3.98475	3.18686	3.06495	3.51169
ASRNV20032489	0.0010761	0.0260569	2.30437	up	noncoding	long noncoding	XR_592305	LOC500354	RefSeq model	1278	chr4	+	235068007	235079705	CCCTTTTCCCCTTAAAGGTAAGCATTTAAGTTGAAATCTTCATAAAGCTCAGTTGGTTAT	500354	exon sense-overlapping	ENSRNOT00000032568	LOC500354		+	235077940	235079342	14.127	7.12389	3.80227	2.59789	17.4791	13.1017	11.7254	14.2018	5	13.1283	5.36724	5	3.94224	3.92625	3.37014	3.97044	2.62093	2.99899	2.42345	2.34821
ASRNV20032489	0.0010761	0.0260569	2.30437	up	noncoding	long noncoding	XR_592305	LOC500354	RefSeq model	1278	chr4	+	235068007	235079705	CCCTTTTCCCCTTAAAGGTAAGCATTTAAGTTGAAATCTTCATAAAGCTCAGTTGGTTAT	500354	exon sense-overlapping	NM_001037797	LOC500354	similar to C030030A07Rik protein	+	235067928	235079358	14.127	7.12389	3.80227	2.59789	17.4791	13.1017	11.7254	14.2018	5	13.1283	5.36724	5	3.94224	3.92625	3.37014	3.97044	2.62093	2.99899	2.42345	2.34821
ASRNV20032489	0.0010761	0.0260569	2.30437	up	noncoding	long noncoding	XR_592305	LOC500354	RefSeq model	1278	chr4	+	235068007	235079705	CCCTTTTCCCCTTAAAGGTAAGCATTTAAGTTGAAATCTTCATAAAGCTCAGTTGGTTAT	500354	intronic antisense	ENSRNOT00000073975	LOC100912609		-	235069684	235070359	14.127	7.12389	3.80227	2.59789	17.4791	13.1017	11.7254	14.2018	5	13.1283	5.36724	5	3.94224	3.92625	3.37014	3.97044	2.62093	2.99899	2.42345	2.34821
ASRNV20003090	0.000237773	0.00891736	2.29626	up	noncoding	pseudogene	ENSRNOT00000036579	AABR06105792.1	Ensembl	1104	chrX	-	79974710	79975822	AACCTAGAGCCTTAAGTTGTGTGTGGCTGAATATTGGTCCTAGTAAGTTGAAGATGTCAA		intergenic							12.7138	5.44014	3.61895	2.41967	17.3553	11.7254	12.6517	9.12266	5	6.76056	5	5	3.93174	3.76199	3.45481	3.32725	2.62093	2.37633	2.3332	2.34821
ASRNV20035111	0.000322797	0.0112501	2.26813	up	noncoding	long noncoding	XR_596011	LOC102547244	RefSeq model	7580	chr15	-	108890213	108928838	CTTCTATTTGGACCGACCCTTTGGAGTTTTACCTTTTGGGGTTTTACTGATGTGAAGGAG	102547244	intergenic							12.0462	5	3.58757	2.40606	11.3504	11.3754	11.603	13.8561	5	5	5	5	3.34338	3.71435	3.35908	3.93345	2.62093	2.32191	2.3332	2.34821
ASRNV20034897	4.70576e-05	0.00312621	2.26348	up	noncoding	long noncoding	XR_595545	LOC103692068	RefSeq model	2964	chr13	-	91970819	91976370	TTCACACAGGGAAAGGGAAGTGATTTGTTGTACTGGGGTTTCGGGTTATTGGTTTCTTTC	103692068	intergenic							12.1099	5	3.5846	2.40606	12.0798	10.9747	12.7472	12.6378	5	5	5	5	3.41912	3.65709	3.46358	3.7986	2.62093	2.32191	2.3332	2.34821
ASRNV20035778	0.000433485	0.0134745	2.26313	up	noncoding	long noncoding	XR_596993	LOC102555171	RefSeq model	299	chr18	+	44624410	44631451	AGTCATTGTCCACCATAGCATCTCATATCATTTTCTTCATGGCAATTCCAGGCATCCGAA	102555171	intergenic							13.1636	6.54945	3.70172	2.5234	16.1888	13.1613	11.4822	11.822	5	11.1978	5	5	3.82804	3.9321	3.34705	3.69969	2.62093	2.79127	2.3332	2.34821
ASRNV20036830	0.000272004	0.00987898	2.25923	up	noncoding	long noncoding	XR_600244	LOC102553021	RefSeq model	4375	chr3	-	72963672	72982360	TGTTTGGCTATTTCCCCATCTTAAGGTGTCAGCCATTGTTAAGGGTATCCTGTGCGCTTA	102553021	intron sense-overlapping	NM_019218	Neurod1	neuronal differentiation 1	-	72974882	72978179	12.4867	5.36982	3.63816	2.46232	13.1987	11.8158	11.1284	13.8041	5	5	6.47927	5	3.54577	3.7741	3.30582	3.92694	2.62093	2.32191	2.55825	2.34821
ASRNV20030521	8.48803e-05	0.00472363	2.25751	up	noncoding	long noncoding	XR_589979	LOC102546709	RefSeq model	3674	chr1	+	56933543	56982285	GTCACAACACCTCAAACATTACAAGGACCACAATTTTGGCATGACCCCTAGTGTTTCAGC	102546709	intergenic							12.0492	5.04108	3.58225	2.40752	13.6668	10.9601	11.0264	12.5437	5	5.16431	5	5	3.59153	3.65489	3.29657	3.78602	2.62093	2.32776	2.3332	2.34821
ASRNV20036180	0.000668766	0.0189655	2.25144	up	noncoding	long noncoding	XR_597537	LOC102550778	RefSeq model	2109	chrX	-	18859655	18864461	GCGGTTCTCCAGGAAAGGGGAGAGAAAAATAATTGCTGAAACCTTTGGCTCTACATCTAG	102550778	exon sense-overlapping	ENSRNOT00000042670	LOC100912524	spindlin-2B-like	-	18848335	18864331	12.1432	5.23787	3.58477	2.41392	15.0031	13.4356	9.92591	10.2082	5	5.95148	5	5	3.72366	3.96005	3.17241	3.48296	2.62093	2.35334	2.3332	2.34821
ASRNV20029704	0.00084366	0.0221643	2.24628	up	noncoding	long noncoding	XR_361154	LOC102548777	RefSeq model	1866	chr17	+	81949192	81952116	GCTAATTGAGGAGTAACTATATGGGGCTCTGGATTGTATGAAAGGTCTGTAAAAATTATA	102548777	intergenic							87.5235	41.8303	6.35046	5.18292	118.287	77.7275	97.1227	56.9573	12.6714	60.4936	55.4326	38.7234	6.51006	6.61228	6.21402	6.06548	4.79403	5.16638	5.43199	5.33929
ASRNV20008791	1.01047e-05	0.00122565	2.22473	up	noncoding	long noncoding	ENSRNOT00000075976	Astn1	Ensembl	6128	chr13	+	81109683	81285187	CACGCGCTCGGTCTTCCATACAGGGCTGCAATGTAACGTCTGGTATGGCCCTCCCCTCAG	304900	exon sense-overlapping	NM_001170603	Astn1	astrotactin 1	+	80970384	81285187	65.412	30.0963	5.94433	4.7907	90.7556	50.1504	71.1837	49.5584	13.069	46.2991	33.2449	27.7722	6.15681	5.95958	5.79974	5.86118	4.8404	4.78337	4.6967	4.84231
ASRNV20027128	7.13826e-05	0.00416557	2.22429	up	noncoding	long noncoding	XR_339408	LOC102554162	RefSeq model	1663	chr12	+	13859596	13863234	GGATCTTTACACCAAATTATCCTGATGGCCCCATTTTGGAGGTTTTAATATAAATGTGTG	102554162	intergenic							12.6355	6.30985	3.64575	2.4924	14.3257	11.7905	12.2172	12.2087	5	10.2394	5	5	3.65415	3.76872	3.41464	3.74548	2.62093	2.66727	2.3332	2.34821
ASRNV20036554	0.00073179	0.0199992	2.21657	up	noncoding	long noncoding	XR_598782	LOC102554169	RefSeq model	2977	chr1	-	90435093	90456092	CAGCGTCTGGGCTCACAGCAACCCTCCTATAAAAGTGGACTGTCATGCCCATTCTACAGG	102554169	intergenic							23.3002	10.423	4.51457	3.36624	28.0532	19.1753	24.6829	21.2893	6.58714	14.7037	10.9637	9.43743	4.59426	4.49839	4.38317	4.58245	3.8865	3.14772	3.17375	3.25698
ASRNV20027640	3.29652e-05	0.00249067	2.20095	up	noncoding	long noncoding	XR_342504	LOC102550206	RefSeq model	715	chr1	+	16058378	16063269	TTAGACCTCCTGTCTTACTGGAATTGCTTTGGTATGGAAAGAGGCAACAGGCATGCTATG	102550206	intergenic							12.0235	5	3.54419	2.40606	15.243	9.37208	13.6772	9.80169	5	5	5	5	3.74601	3.43899	3.56408	3.42767	2.62093	2.32191	2.3332	2.34821
ASRNV20028517	0.000632427	0.0180836	2.18331	up	noncoding	long noncoding	XR_347674	LOC102550216	RefSeq model	1142	chr7	-	27428976	27431346	GCTCTGATAATTAATGCTGCCTTTATGACTTGAGAGCATTTCCCTTCCTATCTTATTTAT	102550216	intronic antisense	ENSRNOT00000031871	Nt5dc3		+	27430563	27482415	49.7111	23.6262	5.57887	4.45235	45.9113	48.4404	67.8036	36.689	10.7846	35.9926	23.6408	24.0867	5.26459	5.89982	5.73974	5.41132	4.57319	4.40258	4.21023	4.6234
ASRNV20028517	0.000632427	0.0180836	2.18331	up	noncoding	long noncoding	XR_347674	LOC102550216	RefSeq model	1142	chr7	-	27428976	27431346	GCTCTGATAATTAATGCTGCCTTTATGACTTGAGAGCATTTCCCTTCCTATCTTATTTAT	102550216	intronic antisense	NM_001134887	Nt5dc3	5'-nucleotidase domain containing 3	+	27430563	27482415	49.7111	23.6262	5.57887	4.45235	45.9113	48.4404	67.8036	36.689	10.7846	35.9926	23.6408	24.0867	5.26459	5.89982	5.73974	5.41132	4.57319	4.40258	4.21023	4.6234
ASRNV20033313	2.17201e-05	0.00193814	2.18202	up	noncoding	long noncoding	XR_593260	Zfp709l1	RefSeq model	4634	chr7	-	10584804	10606855	AAGGATAATTTTGTGCCAGCACAAATGCGTTCTGAACCAAACCCAGGTCTTCTGCAAGAG	690419	exon sense-overlapping	ENSRNOT00000047433	Zfp709l1		-	10589592	10601983	12.9548	6.13522	3.66251	2.53685	15.3607	12.2826	14.3207	9.85512	5	8.27748	5.87273	5.39068	3.75558	3.82958	3.62958	3.43532	2.62093	2.45561	2.48477	2.58608
ASRNV20033313	2.17201e-05	0.00193814	2.18202	up	noncoding	long noncoding	XR_593260	Zfp709l1	RefSeq model	4634	chr7	-	10584804	10606855	AAGGATAATTTTGTGCCAGCACAAATGCGTTCTGAACCAAACCCAGGTCTTCTGCAAGAG	690419	exon sense-overlapping	NM_001163063	Zfp709l1	zinc finger protein 709-like 1	-	10588575	10607708	12.9548	6.13522	3.66251	2.53685	15.3607	12.2826	14.3207	9.85512	5	8.27748	5.87273	5.39068	3.75558	3.82958	3.62958	3.43532	2.62093	2.45561	2.48477	2.58608
ASRNV20035614	0.000279549	0.0100823	2.17827	up	noncoding	long noncoding	XR_596779	LOC103694089	RefSeq model	3935	chr17	-	44025830	44029923	CTTATTGTAACAAATGTATGGGCCGGCGATCTACCCAGTGAATCAAACATGCACACACAA	103694089	natural antisense	NM_022851	Aldh5a1	aldehyde dehydrogenase 5 family, member A1	+	44000874	44027211	15.1556	7.64245	3.8664	2.74322	21.8008	12.823	14.4409	11.5577	5	11.5635	7.70829	6.29795	4.25765	3.8941	3.64214	3.67171	2.62093	2.83062	2.75261	2.76872
ASRNV20031833	0.000420682	0.0132355	2.16488	up	noncoding	long noncoding	XR_591514	LOC102546943	RefSeq model	1808	chr3	+	50697780	50705714	CCTTTGTAAGAGCTTCCACCACGGGATTCATTGTCACAACTCACAGGACCTAAGGATGCT	102546943	intergenic							11.5273	5.19574	3.52691	2.41262	13.4481	11.604	9.45876	11.5985	5	5.78298	5	5	3.57056	3.74807	3.11215	3.67686	2.62093	2.34816	2.3332	2.34821
ASRNV20031419	0.000394623	0.012815	2.15169	up	noncoding	long noncoding	XR_591040	LOC103691526	RefSeq model	1106	chr2	-	139995122	140022598	TTTTACAAGCAGAATCTGGAGGCTCTCAAAGGCTCCTTCTCAGCTTCAGCGGAGTAAAAA	103691526	intergenic							11.3953	5	3.51153	2.40606	12.0843	11.1715	9.86282	12.4628	5	5	5	5	3.41973	3.68575	3.16411	3.77652	2.62093	2.32191	2.3332	2.34821
ASRNV20008936	0.000120153	0.00570508	2.14259	up	noncoding	long noncoding	ENSRNOT00000076259	Dopey2	Ensembl	7254	chr11	+	37516741	37617052	GCACCTGACACGAGAAATCCAGGGTAGTCGTGTGACATCTCACAACCGCTCCTTTGACAG	304077	exon sense-overlapping	NM_001191660	Dopey2	dopey family member 2	+	37520385	37617064	13.3622	6.94128	3.69239	2.59303	15.6975	11.2847	16.4579	10.0085	5	9.72403	8.04107	5	3.78602	3.70338	3.82438	3.45578	2.62093	2.59872	2.80427	2.34821
ASRNV20034823	0.00191405	0.0379546	2.13352	up	noncoding	long noncoding	XR_595335	LOC102556092	RefSeq model	2932	chr12	-	39057826	39084648	CCAGGTCGCCGCTCTCCGCGAACTCGGCTTCTTTGTGAGACCTTTCTGGCCAAACTCCAG	102556092	exon sense-overlapping	ENSRNOT00000001338	Zfp664		-	39058750	39059536	28.9593	14.2082	4.85234	3.75911	30.527	26.2889	27.7138	31.3073	8.38645	21.0795	15.2155	12.1515	4.70871	4.97898	4.54248	5.17922	4.21712	3.62468	3.59815	3.5965
ASRNV20028849	8.84125e-06	0.00112982	2.12919	up	noncoding	long noncoding	XR_349687	LOC100911498	RefSeq model	7305	chrX	-	75129477	75146742	ACTTGGACTTTGTGAACTGTGGACTCTTTGGGTGTTTTGAAGACTTTTTTAAAAAGTGTT	100911498	intronic antisense	ENSRNOT00000076538	LOC680227		+	75121065	75150723	11.4559	5	3.49636	2.40606	13.3913	9.39539	12.4673	10.5697	5	5	5	5	3.56561	3.44256	3.44009	3.53719	2.62093	2.32191	2.3332	2.34821
ASRNV20028849	8.84125e-06	0.00112982	2.12919	up	noncoding	long noncoding	XR_349687	LOC100911498	RefSeq model	7305	chrX	-	75129477	75146742	ACTTGGACTTTGTGAACTGTGGACTCTTTGGGTGTTTTGAAGACTTTTTTAAAAAGTGTT	100911498	natural antisense	ENSRNOT00000075940	LOC680227		+	75121051	75150421	11.4559	5	3.49636	2.40606	13.3913	9.39539	12.4673	10.5697	5	5	5	5	3.56561	3.44256	3.44009	3.53719	2.62093	2.32191	2.3332	2.34821
ASRNV20028849	8.84125e-06	0.00112982	2.12919	up	noncoding	long noncoding	XR_349687	LOC100911498	RefSeq model	7305	chrX	-	75129477	75146742	ACTTGGACTTTGTGAACTGTGGACTCTTTGGGTGTTTTGAAGACTTTTTTAAAAAGTGTT	100911498	natural antisense	NM_001047974	LOC680227	LRRGT00193	+	75109507	75146839	11.4559	5	3.49636	2.40606	13.3913	9.39539	12.4673	10.5697	5	5	5	5	3.56561	3.44256	3.44009	3.53719	2.62093	2.32191	2.3332	2.34821
ASRNV20032440	0.000714661	0.0197265	2.12653	up	noncoding	long noncoding	XR_592243	LOC103692204	RefSeq model	1561	chr4	+	209093769	209098600	ATGGAGAAGTAGAAAGGAACTTCACTGATGCCCTCACGTTGGCATTTAAGGATCACCCAT	103692204	intronic antisense	ENSRNOT00000043476	Atp2b2		-	209001177	209104640	11.5246	5.32888	3.5051	2.4166	15.3562	11.7254	9.44897	9.5678	5	6.31552	5	5	3.75514	3.76187	3.11108	3.39231	2.62093	2.36405	2.3332	2.34821
ASRNV20032440	0.000714661	0.0197265	2.12653	up	noncoding	long noncoding	XR_592243	LOC103692204	RefSeq model	1561	chr4	+	209093769	209098600	ATGGAGAAGTAGAAAGGAACTTCACTGATGCCCTCACGTTGGCATTTAAGGATCACCCAT	103692204	intronic antisense	ENSRNOT00000044110	Atp2b2		-	209001177	209104640	11.5246	5.32888	3.5051	2.4166	15.3562	11.7254	9.44897	9.5678	5	6.31552	5	5	3.75514	3.76187	3.11108	3.39231	2.62093	2.36405	2.3332	2.34821
ASRNV20032440	0.000714661	0.0197265	2.12653	up	noncoding	long noncoding	XR_592243	LOC103692204	RefSeq model	1561	chr4	+	209093769	209098600	ATGGAGAAGTAGAAAGGAACTTCACTGATGCCCTCACGTTGGCATTTAAGGATCACCCAT	103692204	intronic antisense	ENSRNOT00000049290	Atp2b2		-	209001177	209104640	11.5246	5.32888	3.5051	2.4166	15.3562	11.7254	9.44897	9.5678	5	6.31552	5	5	3.75514	3.76187	3.11108	3.39231	2.62093	2.36405	2.3332	2.34821
ASRNV20032440	0.000714661	0.0197265	2.12653	up	noncoding	long noncoding	XR_592243	LOC103692204	RefSeq model	1561	chr4	+	209093769	209098600	ATGGAGAAGTAGAAAGGAACTTCACTGATGCCCTCACGTTGGCATTTAAGGATCACCCAT	103692204	intronic antisense	ENSRNOT00000050928	Atp2b2		-	209001177	209104640	11.5246	5.32888	3.5051	2.4166	15.3562	11.7254	9.44897	9.5678	5	6.31552	5	5	3.75514	3.76187	3.11108	3.39231	2.62093	2.36405	2.3332	2.34821
ASRNV20032440	0.000714661	0.0197265	2.12653	up	noncoding	long noncoding	XR_592243	LOC103692204	RefSeq model	1561	chr4	+	209093769	209098600	ATGGAGAAGTAGAAAGGAACTTCACTGATGCCCTCACGTTGGCATTTAAGGATCACCCAT	103692204	intronic antisense	ENSRNOT00000064541	Atp2b2		-	209001177	209104640	11.5246	5.32888	3.5051	2.4166	15.3562	11.7254	9.44897	9.5678	5	6.31552	5	5	3.75514	3.76187	3.11108	3.39231	2.62093	2.36405	2.3332	2.34821
ASRNV20032440	0.000714661	0.0197265	2.12653	up	noncoding	long noncoding	XR_592243	LOC103692204	RefSeq model	1561	chr4	+	209093769	209098600	ATGGAGAAGTAGAAAGGAACTTCACTGATGCCCTCACGTTGGCATTTAAGGATCACCCAT	103692204	intronic antisense	ENSRNOT00000067931	Atp2b2		-	209001177	209104640	11.5246	5.32888	3.5051	2.4166	15.3562	11.7254	9.44897	9.5678	5	6.31552	5	5	3.75514	3.76187	3.11108	3.39231	2.62093	2.36405	2.3332	2.34821
ASRNV20032440	0.000714661	0.0197265	2.12653	up	noncoding	long noncoding	XR_592243	LOC103692204	RefSeq model	1561	chr4	+	209093769	209098600	ATGGAGAAGTAGAAAGGAACTTCACTGATGCCCTCACGTTGGCATTTAAGGATCACCCAT	103692204	intronic antisense	NM_012508	Atp2b2	ATPase plasma membrane Ca2+ transporting 2	-	209001177	209310124	11.5246	5.32888	3.5051	2.4166	15.3562	11.7254	9.44897	9.5678	5	6.31552	5	5	3.75514	3.76187	3.11108	3.39231	2.62093	2.36405	2.3332	2.34821
ASRNV20027968	0.00172678	0.035365	2.12325	up	noncoding	long noncoding	XR_344414	LOC102555026	RefSeq model	907	chr2	+	177066370	177069641	TGGGGCTACAGGTACCCACAGCCATGCCTGGTCTTTTACCGGGTGCTGAGGATTTGAACT	102555026	intergenic							11.8795	6.07167	3.56216	2.47589	13.9442	13.0592	8.74546	11.7692	5	8.86909	5.4176	5	3.62166	3.92088	3.01193	3.69418	2.62093	2.50482	2.4296	2.34821
ASRNV20008826	0.00101542	0.025085	2.12121	up	noncoding	long noncoding	ENSRNOT00000076067	Rn50_13_0801.2	Ensembl	477	chr13	+	80074671	80084132	ATCCTGAAGTTGAGTCCAGAGTTCCCGGTGTTTACAGCGTTCCTAAACCATGTGTTTACA		intergenic							12.1835	5.90471	3.55948	2.47459	18.163	8.96308	10.225	11.3828	5	7.27643	6.3424	5	3.99591	3.3838	3.21009	3.64811	2.62093	2.38959	2.53964	2.34821
ASRNV20037145	0.000726026	0.0199339	2.11381	up	noncoding	long noncoding	XR_601622	LOC100910810	RefSeq model	4015	chr6	-	143977705	143983677	TATTTCTAGACCAAACACCACTCATATCTTGGTAGGGCTGTCTACGTCTGTAGGTCCCTA	100910810	natural antisense	NM_001191112	Ppp2r5c	protein phosphatase 2, regulatory subunit B', gamma	+	143982520	144075381	11.3171	5.25793	3.49437	2.41452	11.0242	13.4352	11.313	9.49594	5	6.03174	5	5	3.30658	3.95989	3.32867	3.38234	2.62093	2.35576	2.3332	2.34821
ASRNV20028634	0.000223328	0.00846763	2.09448	up	noncoding	long noncoding	XR_348429	LOC102555115	RefSeq model	539	chr8	-	43893101	43896864	AAATCTACAACCAATGGGAACTGGCTAAGTTAGGGACCAATACATTCCCACATCCCCAAC	102555115	intergenic							11.242	5	3.47266	2.40606	14.4194	11.057	10.2811	9.21063	5	5	5	5	3.66394	3.66991	3.21628	3.34049	2.62093	2.32191	2.3332	2.34821
ASRNV20007314	0.00280398	0.047859	2.09148	up	noncoding	pseudogene	ENSRNOT00000072601	AABR06001292.1	Ensembl	447	chr1	-	27995666	27996115	TACTTCATCAAATTTGATGGTGACGTCCACATCTACTTCTATGATCTGGTGGAAAAGATC		intergenic							14.7327	8.61904	3.87141	2.80689	14.2107	15.2766	15.3099	14.1336	5	17.1538	6.28822	6.03413	3.64504	4.14968	3.72675	3.96418	2.62093	3.35367	2.53344	2.71952
ASRNV20030130	0.000936907	0.0238865	2.08907	up	noncoding	long noncoding	XR_589391	LOC103690608	RefSeq model	2279	chr11	-	80675613	80683273	GCTATTATTTTGGGTGGTCACTACCAGACTTTCTAATCTGTTTTCAAACCTTTCTCCCAG	103690608	intergenic							11.4876	5	3.46892	2.40606	16.5737	10.4349	11.1166	7.82531	5	5	5	5	3.85857	3.58671	3.30482	3.12559	2.62093	2.32191	2.3332	2.34821
ASRNV20036366	0.000273329	0.00989241	2.0773	up	noncoding	long noncoding	XR_598029	LOC102551420	RefSeq model	1787	chr17	+	12773078	12784411	ACGGTAACAGAACGGCTAGATGTTCGATCCCTTCACATTCATCACACTTTACAGATAATG	102551420	intergenic							11.2468	5	3.46077	2.40606	9.79889	9.6238	15.5013	10.0633	5	5	5	5	3.16147	3.47461	3.74434	3.46265	2.62093	2.32191	2.3332	2.34821
ASRNV20035302	0.000429365	0.0133866	2.06017	up	noncoding	long noncoding	XR_596424	LOC102551750	RefSeq model	2146	chr16	-	23096660	23105217	TCTTTCTTCCTGAGAGACACAGAAAGAGCACACATGACTCGCCTGCTAGTTATAAAAAAT	102551750	intergenic							11.2056	5.26738	3.45757	2.4148	15.4425	10.4403	10.0266	8.91284	5	6.06953	5	5	3.76259	3.58765	3.18482	3.29521	2.62093	2.35689	2.3332	2.34821
ASRNV20029159	2.61518e-05	0.00212674	2.05393	up	noncoding	long noncoding	XR_353891	Rad54b	RefSeq model	4137	chr5	+	29857610	29925230	CTTTGCCTAGGCCATGGCTAGAGTGTGGAGAGACGGCCAGAAACACCCTGTCCATGTTTA	313063	exon sense-overlapping	ENSRNOT00000061370	Rad54b		+	29863340	29928098	11.4359	5.59909	3.47873	2.44034	12.954	8.48597	14.3638	9.93993	5	7.22928	5.16706	5	3.51681	3.31698	3.63459	3.44654	2.62093	2.38842	2.40382	2.34821
ASRNV20029159	2.61518e-05	0.00212674	2.05393	up	noncoding	long noncoding	XR_353891	Rad54b	RefSeq model	4137	chr5	+	29857610	29925230	CTTTGCCTAGGCCATGGCTAGAGTGTGGAGAGACGGCCAGAAACACCCTGTCCATGTTTA	313063	exon sense-overlapping	NM_001191755	Rad54b	RAD54 homolog B (S. cerevisiae)	+	29863340	29928796	11.4359	5.59909	3.47873	2.44034	12.954	8.48597	14.3638	9.93993	5	7.22928	5.16706	5	3.51681	3.31698	3.63459	3.44654	2.62093	2.38842	2.40382	2.34821
ASRNV20029159	2.61518e-05	0.00212674	2.05393	up	noncoding	long noncoding	XR_353891	Rad54b	RefSeq model	4137	chr5	+	29857610	29925230	CTTTGCCTAGGCCATGGCTAGAGTGTGGAGAGACGGCCAGAAACACCCTGTCCATGTTTA	313063	intron sense-overlapping	ENSRNOT00000020245	LOC102550523	fibrinogen silencer-binding protein-like	+	29883351	29887996	11.4359	5.59909	3.47873	2.44034	12.954	8.48597	14.3638	9.93993	5	7.22928	5.16706	5	3.51681	3.31698	3.63459	3.44654	2.62093	2.38842	2.40382	2.34821
ASRNV20008710	0.000562123	0.0166244	2.05323	up	noncoding	pseudogene	ENSRNOT00000075803	AABR06021735.1	Ensembl	507	chr2	+	283318662	283319174	AACACAGTTATGAGATCTTCCTACGTCACGCCAACGTCATCCGCTATATTGTTTGTAGGG		intergenic							10.9578	5	3.44396	2.40606	13.8948	9.37227	9.04236	11.522	5	5	5	5	3.61625	3.43909	3.05417	3.66633	2.62093	2.32191	2.3332	2.34821
ASRNV20035284	0.00155995	0.0335001	2.03312	up	noncoding	long noncoding	XR_596401	LOC102555898	RefSeq model	487	chr16	+	15193224	15200493	TTCCCTGCAGTTGTCTTAACCAAGTGGGAACTCTGTGCCCATCGACAATGAGGCCGATGG	102555898	intergenic							11.1762	5	3.42976	2.40606	10.7991	6.73765	15.6183	11.5499	5	5	5	5	3.28111	3.01338	3.75415	3.67039	2.62093	2.32191	2.3332	2.34821
ASRNV20027270	0.00200844	0.0391751	2.03104	up	noncoding	long noncoding	XR_340330	LOC102547538	RefSeq model	624	chr14	-	76079878	76095840	GGTACACTATTGCATTTATTCTTGGTAAACATCCATGCCACTGTATCTTTTTGAAGTATG	102547538	intronic antisense	ENSRNOT00000059966	AABR06079982.1		+	76057613	76176821	10.6525	5	3.42828	2.40606	9.56394	12.1418	9.36481	11.5393	5	5	5	5	3.13309	3.81207	3.0986	3.66936	2.62093	2.32191	2.3332	2.34821
ASRNV20029761	3.49492e-05	0.00256567	2.03038	up	noncoding	long noncoding	XR_361977	LOC102555749	RefSeq model	180	chr19	-	72410209	72432569	TTGACCGTCCACATACTCTGGTTCTTTCATTATCTGCATTCAGTAAACAAGAGCTTGAAG	102555749	intergenic							10.8284	5	3.42781	2.40606	12.0343	10.5369	11.431	9.31121	5	5	5	5	3.41395	3.60129	3.34159	3.35441	2.62093	2.32191	2.3332	2.34821
ASRNV20032292	0.000987854	0.0246392	2.02747	up	noncoding	long noncoding	XR_592067	LOC103690249	RefSeq model	8960	chr4	+	58336676	58415575	AATTGTTCTTAATGTTGACACTTTTGCTTAGATTCCTTCGCACTCCCGCTTCCTCCACAT	103690249	intergenic							69.0177	36.1493	6.05566	5.03598	84.6614	63.6669	69.8291	57.9132	17.0293	56.003	46.9393	24.6257	6.0598	6.30314	5.77173	6.08798	5.23916	5.05828	5.18747	4.65902
ASRNV20031962	0.000126073	0.00585638	2.02063	up	noncoding	long noncoding	XR_591660	LOC102555660	RefSeq model	1240	chr3	+	126548810	126550751	GGAGCATCCTGGTCCAGAAGTAGGGTTCATGTTCATACTGCATCTTTGCACAAATTACAG	102555660	intergenic							10.6896	5	3.42087	2.40606	10.9272	9.11803	11.0336	11.6796	5	5	5	5	3.29617	3.40525	3.29721	3.68483	2.62093	2.32191	2.3332	2.34821
ASRNV20006062	0.000791841	0.0210703	2.01115	up	noncoding	pseudogene	ENSRNOT00000065450	Mageb7	Ensembl	1075	chrX	-	55142127	55143202	CATATCCATCATGCCCAGGGGACAGAAGAGTAGGGCCCGAGCTCGTGAGAAGCGTCGCCA	503442	exon sense-overlapping	NM_001109367	Mageb7	melanoma antigen, family B, 7	-	55142134	55143172	12.6264	6.89001	3.64529	2.63727	15.7352	12.4317	10.2096	12.1291	5	10.9178	5.64049	6.00177	3.78831	3.84833	3.20754	3.73699	2.62093	2.75795	2.45805	2.71217

## Sheet: down_DPN_vs_T2DM
ProbeName	P-value	FDR	Fold Change	Regulation	type	transcript_type	seqname	GeneSymbol	source	RNAlength	chrom	strand	txStart	txEnd	Sequence	EntrezID	relationship	Associated_gene_acc	Associated_gene_name	Associated_protein_name	Associated_gene_strand	associated_gene_start	Associated_gene_end	group-DPN(raw)	group-T2DM(raw)	group-DPN(normalized)	group-T2DM(normalized)	[DPN](raw)	[ DPN](raw)	[DPN](raw)	[ DPN](raw)	[T2DM](raw)	[T2DM](raw)	[T2DM](raw)	[ T2DM](raw)	[ DPN](normalized)	[DPN](normalized)	[DPN](normalized)	[DPN](normalized)	[ T2DM](normalized)	[ T2DM](normalized)	[T2DM](normalized)	[ T2DM](normalized)
ASRNV20035762	2.7246e-09	2.8202e-05	8.96755	down	noncoding	long noncoding	XR_591075	LOC103691540	RefSeq model	888	chr2	-	153302542	153368421	GCTTTCCATTCCTTGTTTTCTGTTAACCTCTCTGGATTTTAAATATGTGTTGTGGCTGCT	103691540	intergenic							5	49.3439	2.34756	5.51228	5	5	5	5	20.7042	73.1658	55.0418	48.4637	2.33557	2.36227	2.33678	2.35563	5.51592	5.4378	5.41984	5.67554
ASRNV20031498	0.00061256	0.0176128	8.63344	down	noncoding	long noncoding	XR_592583	LOC102547623	RefSeq model	486	chr5	+	109042724	109043438	TTTGTTTTGTTTTGTTTTTTTTAACGTTTCTTCCGTGAGCCCGGCCCAGGCAGAATTTCC	102547623	intergenic							31.6795	242.764	4.87565	7.98559	42.1321	20.3153	20.0338	44.2368	174.548	336.127	209.214	251.167	5.143	4.57903	4.09072	5.68986	8.82055	7.66623	7.312	8.14357
ASRNV20027604	0.000330024	0.0113332	7.36065	down	noncoding	long noncoding	XR_591002	LOC103690087	RefSeq model	2227	chr2	-	125013219	125027013	TAGGGGGTTCATTTTTGAGAAAGACCAATTTCCTCACTCTTCATAGTATTTATTTGCATG	103690087	intergenic							5	51.3196	2.34756	5.22739	5	5	5	5	8.81214	70.4948	93.5297	32.4419	2.33557	2.36227	2.33678	2.35563	4.27725	5.38447	6.17662	5.07124
ASRNV20029206	5.63215e-06	0.000874469	7.12628	down	noncoding	long noncoding	XR_589164	LOC103690475	RefSeq model	2324	chr8	+	130020595	130033894	TAAAAGGGACTTGCTCTGACTTTGGGTGTTGGTCTGGTTGTTTTCTCCTGGGAAATCAAG	103690475	intronic antisense	ENSRNOT00000035371	Ano10	anoctamin 10	-	130005121	130077030	9.73065	74.8893	3.26011	6.09326	14.1463	7.5933	7.58217	9.60086	27.0693	106.4	94.1999	71.8879	3.63926	3.16645	2.83714	3.3976	5.92522	5.988	6.18654	6.27329
ASRNV20030988	3.39277e-05	0.00253749	6.95836	down	noncoding	long noncoding	XR_347314	LOC102553798	RefSeq model	1151	chr6	+	103714356	103716525	CAGATCATTAATGTAGACGTTTCTATCTTCCTGTCTTGACCTACCTGATTTGTTTCTCAG	102553798	intergenic							8.78408	67.5715	3.13245	5.93119	10.5092	11.6093	6.73435	6.28343	23.9468	93.2619	91.1938	61.8836	3.24669	3.74844	2.69039	2.84426	5.74339	5.79822	6.13882	6.04435
ASRNV20033922	2.70329e-08	6.9954e-05	6.824	down	noncoding	long noncoding	XR_346359	LOC102551372	RefSeq model	2787	chr5	+	26459964	26469652	GATTGGTCAGCATCTTCACCTTACATGTATTTCTACATCCAGTTTTCCCGCTCTTCCTGG	102551372	intergenic							5.74035	44.4998	2.55477	5.32539	6.7227	5	6.08267	5.15604	17.16	70.6994	50.8441	39.2958	2.68919	2.36227	2.57343	2.59419	5.25132	5.38906	5.30284	5.35834
ASRNV20030455	2.52584e-06	0.0006225	6.80926	down	noncoding	long noncoding	XR_339251	LOC102548576	RefSeq model	992	chr11	+	83911340	83916539	ACCTTTTGGACTGTGTGCTTATTAAATCTGTCCTTTCTGCCTTCAGGCTTTACCCACCTA	102548576	intergenic							5.15121	41.7848	2.44755	5.21505	5	5.60482	5	5	13.7787	58.9404	51.5327	42.8873	2.33557	2.76223	2.33678	2.35563	4.91818	5.13243	5.32216	5.48743
ASRNV20026691	3.53954e-05	0.00258013	6.5453	down	noncoding	long noncoding	XR_342538	LOC102553363	RefSeq model	1380	chr1	-	23180145	23184560	AACTAGCCCAATTAACAGCATTCCTCTTCAAAGCATTTTCTCCTCTCATGTTCTTATGTA	102553363	intergenic							10.644	72.4851	3.36528	6.07573	11.8025	6.07786	9.88801	14.8078	30.2244	108.462	85.4834	65.771	3.38939	2.86916	3.16804	4.03452	6.09869	6.01613	6.0493	6.13882
ASRNV20033916	0.000101723	0.00518685	6.31705	down	noncoding	long noncoding	XR_591727	LOC103691913	RefSeq model	1055	chr3	-	147976358	147977668	AAATGATCTGAAGCCAAAATTGGCCTCCTTCCAGAAATTCCTCCTGCTGTACTGTTGGCA	103691913	intergenic							12.0469	78.9893	3.55541	6.21466	12.7126	11.0154	7.56821	16.8915	33.0766	115.439	90.7864	76.6548	3.49162	3.66284	2.83459	4.2326	6.23278	6.12086	6.13164	6.37336
ASRNV20031792	2.03217e-06	0.000584305	6.12875	down	noncoding	pseudogene	XR_596106	LOC102551213	RefSeq model	1008	chr15	-	33088877	33516960	AGACTACTTACTCAGCTTCTACCCTGTTCTGGTATGTGCAATATCTCAATGAAGCCCCTC	102551213	intron sense-overlapping	ENSRNOT00000047082	LOC100360997	rCG61261-like	-	33165091	33166032	11.2112	77.1104	3.46945	6.08505	11.1569	8.77873	13.3933	11.5157	23.7627	124.495	88.3917	71.7924	3.32096	3.35714	3.53361	3.66611	5.73322	6.23927	6.09703	6.27068
ASRNV20027446	2.03217e-06	0.000584305	6.12875	down	noncoding	pseudogene	XR_596106	LOC102551213	RefSeq model	1008	chr15	-	33088877	33516960	AGACTACTTACTCAGCTTCTACCCTGTTCTGGTATGTGCAATATCTCAATGAAGCCCCTC	102551213	intron sense-overlapping	ENSRNOT00000060298	LOC100911282	uncharacterized LOC100911282	-	33495525	33496039	11.2112	77.1104	3.46945	6.08505	11.1569	8.77873	13.3933	11.5157	23.7627	124.495	88.3917	71.7924	3.32096	3.35714	3.53361	3.66611	5.73322	6.23927	6.09703	6.27068
ASRNV20009029	2.03217e-06	0.000584305	6.12875	down	noncoding	pseudogene	XR_596106	LOC102551213	RefSeq model	1008	chr15	-	33088877	33516960	AGACTACTTACTCAGCTTCTACCCTGTTCTGGTATGTGCAATATCTCAATGAAGCCCCTC	102551213	intron sense-overlapping	ENSRNOT00000071061	AABR06082912.2		-	33266241	33266816	11.2112	77.1104	3.46945	6.08505	11.1569	8.77873	13.3933	11.5157	23.7627	124.495	88.3917	71.7924	3.32096	3.35714	3.53361	3.66611	5.73322	6.23927	6.09703	6.27068
ASRNV20032731	2.03217e-06	0.000584305	6.12875	down	noncoding	pseudogene	XR_596106	LOC102551213	RefSeq model	1008	chr15	-	33088877	33516960	AGACTACTTACTCAGCTTCTACCCTGTTCTGGTATGTGCAATATCTCAATGAAGCCCCTC	102551213	intron sense-overlapping	ENSRNOT00000071671	AABR06082895.1		-	33096022	33096471	11.2112	77.1104	3.46945	6.08505	11.1569	8.77873	13.3933	11.5157	23.7627	124.495	88.3917	71.7924	3.32096	3.35714	3.53361	3.66611	5.73322	6.23927	6.09703	6.27068
ASRNV20032251	2.03217e-06	0.000584305	6.12875	down	noncoding	pseudogene	XR_596106	LOC102551213	RefSeq model	1008	chr15	-	33088877	33516960	AGACTACTTACTCAGCTTCTACCCTGTTCTGGTATGTGCAATATCTCAATGAAGCCCCTC	102551213	intron sense-overlapping	ENSRNOT00000072745	AABR06082901.1		-	33183953	33184387	11.2112	77.1104	3.46945	6.08505	11.1569	8.77873	13.3933	11.5157	23.7627	124.495	88.3917	71.7924	3.32096	3.35714	3.53361	3.66611	5.73322	6.23927	6.09703	6.27068
ASRNV20032251	2.03217e-06	0.000584305	6.12875	down	noncoding	pseudogene	XR_596106	LOC102551213	RefSeq model	1008	chr15	-	33088877	33516960	AGACTACTTACTCAGCTTCTACCCTGTTCTGGTATGTGCAATATCTCAATGAAGCCCCTC	102551213	intron sense-overlapping	ENSRNOT00000074218	RGD1563780	similar to RIKEN cDNA A430107P09 gene	-	33173488	33173989	11.2112	77.1104	3.46945	6.08505	11.1569	8.77873	13.3933	11.5157	23.7627	124.495	88.3917	71.7924	3.32096	3.35714	3.53361	3.66611	5.73322	6.23927	6.09703	6.27068
ASRNV20031337	2.03217e-06	0.000584305	6.12875	down	noncoding	pseudogene	XR_596106	LOC102551213	RefSeq model	1008	chr15	-	33088877	33516960	AGACTACTTACTCAGCTTCTACCCTGTTCTGGTATGTGCAATATCTCAATGAAGCCCCTC	102551213	intron sense-overlapping	ENSRNOT00000074483	LOC100359766		-	33446612	33447045	11.2112	77.1104	3.46945	6.08505	11.1569	8.77873	13.3933	11.5157	23.7627	124.495	88.3917	71.7924	3.32096	3.35714	3.53361	3.66611	5.73322	6.23927	6.09703	6.27068
ASRNV20036145	2.03217e-06	0.000584305	6.12875	down	noncoding	pseudogene	XR_596106	LOC102551213	RefSeq model	1008	chr15	-	33088877	33516960	AGACTACTTACTCAGCTTCTACCCTGTTCTGGTATGTGCAATATCTCAATGAAGCCCCTC	102551213	intron sense-overlapping	ENSRNOT00000074782	AABR06082916.1		-	33355979	33356436	11.2112	77.1104	3.46945	6.08505	11.1569	8.77873	13.3933	11.5157	23.7627	124.495	88.3917	71.7924	3.32096	3.35714	3.53361	3.66611	5.73322	6.23927	6.09703	6.27068
ASRNV20034616	2.03217e-06	0.000584305	6.12875	down	noncoding	pseudogene	XR_596106	LOC102551213	RefSeq model	1008	chr15	-	33088877	33516960	AGACTACTTACTCAGCTTCTACCCTGTTCTGGTATGTGCAATATCTCAATGAAGCCCCTC	102551213	intron sense-overlapping	ENSRNOT00000075008	AABR06082929.1		-	33503413	33503843	11.2112	77.1104	3.46945	6.08505	11.1569	8.77873	13.3933	11.5157	23.7627	124.495	88.3917	71.7924	3.32096	3.35714	3.53361	3.66611	5.73322	6.23927	6.09703	6.27068
ASRNV20032455	2.03217e-06	0.000584305	6.12875	down	noncoding	pseudogene	XR_596106	LOC102551213	RefSeq model	1008	chr15	-	33088877	33516960	AGACTACTTACTCAGCTTCTACCCTGTTCTGGTATGTGCAATATCTCAATGAAGCCCCTC	102551213	intron sense-overlapping	ENSRNOT00000075046	AABR06082912.1		-	33288673	33289255	11.2112	77.1104	3.46945	6.08505	11.1569	8.77873	13.3933	11.5157	23.7627	124.495	88.3917	71.7924	3.32096	3.35714	3.53361	3.66611	5.73322	6.23927	6.09703	6.27068
ASRNV20032455	2.03217e-06	0.000584305	6.12875	down	noncoding	pseudogene	XR_596106	LOC102551213	RefSeq model	1008	chr15	-	33088877	33516960	AGACTACTTACTCAGCTTCTACCCTGTTCTGGTATGTGCAATATCTCAATGAAGCCCCTC	102551213	intron sense-overlapping	ENSRNOT00000075484	AABR06082900.1		-	33169458	33169974	11.2112	77.1104	3.46945	6.08505	11.1569	8.77873	13.3933	11.5157	23.7627	124.495	88.3917	71.7924	3.32096	3.35714	3.53361	3.66611	5.73322	6.23927	6.09703	6.27068
ASRNV20033127	6.15788e-06	0.000910575	6.10732	down	noncoding	long noncoding	XR_594834	LOC103693403	RefSeq model	2060	chr10	-	69757318	69759409	CCATCCCCTTTAATATGTTTGTCCCTGACTTCCAGCTGAGCTTACCAAGATTGTTAAAGA	103693403	intergenic							7.77423	51.9756	2.95511	5.56565	6.96883	5.15371	10.9743	8.00012	19.5495	74.5014	62.2415	51.6098	2.73395	2.63865	3.29046	3.15738	5.42887	5.46476	5.59099	5.77797
ASRNV20035891	1.26197e-07	0.000252742	6.06747	down	noncoding	long noncoding	XR_592551	LOC103692378	RefSeq model	991	chr13	+	109862427	109866534	CTCTGTTACGCCTCTGTTTTTCCCGTTCGCTGTTGTTCTATTGGAAAGGTCAAGGCATGG	103692378	intergenic							6.59019	46.0797	2.7949	5.396	7.32679	5.78733	6.19494	7.05171	18.18	68.2959	54.192	43.6509	2.79776	2.80405	2.58974	2.98805	5.33188	5.34162	5.39569	5.5148
ASRNV20035248	0.000141755	0.00619372	5.9192	down	noncoding	long noncoding	XR_589068	LOC103690447	RefSeq model	932	chr8	+	98077630	98081400	CACAAAAGAAGGCAAAACACATTCATTTCCTTTCCTCCCAGCTGTTCTAATGGCACAAGG	103690447	intergenic							12.7873	79.3828	3.61421	6.17961	18.449	14.8815	7.70404	10.1147	28.6055	112.736	100.606	75.5842	4.0232	4.10763	2.85614	3.46988	6.01017	6.07936	6.27863	6.3503
ASRNV20026963	0.000141813	0.00619372	5.88009	down	noncoding	long noncoding	XR_595270	LOC103693622	RefSeq model	554	chr12	-	19134747	19137192	GGCTATGTCACTGTACTTATCAACAGAACACCACATCTGCCTACCCTGACACCAACAATG	103693622	intergenic							17.3171	104.381	4.03991	6.59575	25.946	15.0566	10.2867	17.9793	37.6248	148.2	126.624	105.076	4.49373	4.12525	3.21739	4.32328	6.4312	6.48799	6.60904	6.85476
ASRNV20007266	3.82141e-07	0.000252742	5.77618	down	noncoding	long noncoding	XR_590088	LOC102547493	RefSeq model	1562	chr12	+	19509567	19512500	AAATGAGTTTCAGTCCTTTTACCCTGAATCTCTGCCACCTACCTAACATATCTGTACTTT	102547493	bidirectional	NM_001007147	Sun1	Sad1 and UNC84 domain containing 1	-	19476255	19509115	8.85104	57.6836	3.16195	5.69207	10.9978	7.22422	8.31913	8.86302	20.5309	86.2787	71.6121	52.3126	3.3036	3.10306	2.95337	3.28778	5.5053	5.67775	5.78875	5.79647
ASRNV20029155	1.01831e-05	0.00122565	5.53634	down	noncoding	long noncoding	XR_594642	LOC103693297	RefSeq model	1601	chr10	+	18849757	18874598	GGAGGTCAGAAAACATTGAAAGAACCATCTTCCTTCTCTTATAGTTCACTAATAGATGAA	103693297	intergenic							5.47747	34.9902	2.57185	5.04078	5	6.1554	5	5.75447	16.1135	50.2731	35.5732	38.001	2.33557	2.88516	2.33678	2.72988	5.15525	4.90329	4.79338	5.31121
ASRNV20034323	0.000195563	0.00769685	5.39751	down	noncoding	long noncoding	XR_590941	LOC103691476	RefSeq model	1790	chr2	+	74332727	74367863	CATGTCATCTTCCTTTTGCTCACAAGGCTCTTTTTCCTTTGGGGGAAAAAACCCAAAAAG	103691476	intergenic							8.37911	50.6761	3.03869	5.47099	12.1153	6.3739	5	10.0273	15.3948	70.2872	68.003	49.0195	3.42257	2.93702	2.33678	3.45841	5.08813	5.38058	5.71881	5.69643
ASRNV20034315	9.53156e-07	0.000392717	5.39562	down	noncoding	long noncoding	XR_601912	LOC103690336	RefSeq model	645	chr7	+	118855649	118859210	ACACCCCATGTTGGGTCCTTTCAGCTCCACGCTTCACCCTTTATCTCAGAATCCTTTTTT	103690336	intergenic							20.5771	114.417	4.34531	6.7771	21.247	21.3531	22.7028	17.0053	52.1628	170.169	132.25	103.085	4.22167	4.65743	4.25914	4.24299	6.92627	6.68357	6.67655	6.82199
ASRNV20009221	7.21485e-06	0.0010092	5.2888	down	noncoding	long noncoding	XR_589618	LOC103690784	RefSeq model	518	chrX	+	3521462	3539876	ATTTCTGCCATGCAGAGGTCAGAAAAATCTCAGAGCCACCCTTGCTGTTAGTATGAATGC	103690784	intergenic							5.47809	32.8876	2.44482	4.84776	6.91234	5	5	5	10.0707	47.3086	40.6909	33.4803	2.72461	2.36227	2.33678	2.35563	4.47431	4.81464	4.98292	5.11918
ASRNV20036120	3.65155e-05	0.0026067	5.24611	down	noncoding	long noncoding	XR_592673	LOC103692434	RefSeq model	470	chr5	+	130067150	130068802	AGAACTTCTTTGTCTGGCTAATTCATTCTCTTCTGTAGGTGCTACCACAACCCCTCTGTC	103692434	bidirectional	NM_001109262	Lexm	lymphocyte expansion molecule	-	130042065	130066959	6.35222	40.1996	2.74992	5.14117	5.78835	7.98162	5	6.63892	13.3463	63.4987	46.7838	37.1696	2.51946	3.23008	2.33678	2.91334	4.8692	5.23718	5.18281	5.27548
ASRNV20002316	3.34684e-06	0.000666215	5.24208	down	noncoding	long noncoding	XR_351716	LOC102547848	RefSeq model	943	chr2	-	166854221	166859645	ATGAAAGATGGTCAAGCCGATACCCACTCCCTTCCTACTAATCATAGCACCAAGAGTTTG	102547848	intergenic							17.4041	97.2048	4.11708	6.50722	17.8748	18.5584	16.2795	16.9036	39.2646	146.74	112.658	90.1572	3.97338	4.45063	3.81074	4.23356	6.49688	6.47417	6.44135	6.61648
uc.325-_P1	1.08149e-05	0.00126267	5.06295	down	noncoding	long noncoding	XR_342535	LOC102552962	RefSeq model	1182	chr1	+	22871250	22874713	TAGGTTTTATGGTCCAGGCTATGAAATGTTCCTTATAAGACCCTGCACTTCCCCTTTGGG	102552962	intergenic							8.13369	45.3785	3.05773	5.3977	9.02801	9.61308	6.45239	7.44128	20.0071	66.6943	52.5512	42.2614	3.06251	3.47262	2.63949	3.05628	5.4657	5.30582	5.35097	5.46832
ASRNV20004388	2.09351e-05	0.00193482	5.00397	down	noncoding	long noncoding	XR_341340	LOC102550726	RefSeq model	1248	chr17	-	8773690	8776473	GAAGCTTCCATAGCCAAACTCTTAGTTTTTCTTCTCCTTCCAAATATCAAAAGAAGCAAT	102550726	intergenic							5	28.9155	2.34756	4.67063	5	5	5	5	9.47548	44.0509	26.5537	35.5819	2.33557	2.36227	2.33678	2.35563	4.38878	4.71232	4.37605	5.2054
ASRNV20033805	1.61169e-05	0.00163555	4.98835	down	noncoding	long noncoding	XR_596299	LOC103693886	RefSeq model	1937	chr15	-	106830646	106835339	TCCAGATCTGAGCTCCCTGTTTCTAGTTCCTCACACCTGACCCTTTCCAAAGGGGTGGTC	103693886	intergenic							15.7731	82.5775	3.96357	6.28214	17.8575	15.8458	12.9764	16.4128	33.9505	115.246	97.2842	83.8288	3.97187	4.20695	3.48845	4.18702	6.27271	6.11744	6.2345	6.50391
ASRNV20027472	4.39433e-07	0.000267563	4.88207	down	noncoding	long noncoding	NR_104335	Cistr	RefSeq	502	chr7	-	142137337	142137839	GTAGCTGTTTGCCAGTTTTGCTGTTTGCCTCCTTGTCACGACCTCGGAGAGGGCAGATGG	102216270	intergenic							13.9923	73.834	3.78677	6.07427	15.8426	13.6725	14.5043	11.9496	27.1503	110.881	86.235	71.0702	3.79816	3.98604	3.6483	3.7146	5.9297	6.05345	6.05904	6.25488
ASRNV20035807	0.000112949	0.00546323	4.86969	down	noncoding	long noncoding	XR_592719	LOC102548746	RefSeq model	1132	chr5	+	146741056	146748575	CAACTTTTAGCTATCCTGACCAGACTGCGTGGCATACCTCCTACTGTTCTCAGATCTGAG	102548746	intergenic							12.3349	63.8734	3.60676	5.89059	11.1725	16.5012	11.2173	10.4486	24.9946	85.0108	75.2378	70.2504	3.3235	4.26884	3.31614	3.51855	5.80627	5.65997	5.8589	6.23721
ASRNV20035416	0.000424094	0.0132622	4.86583	down	noncoding	long noncoding	XR_344752	LOC102547779	RefSeq model	685	chr2	+	273284742	273285567	CAGGGCCTCTCTAGACTTTCTGCTCAGTTTTGCTGTTTTCTGTATTAACAATAAAATATT	102547779	intergenic							12.6276	65.5321	3.57615	5.85883	15.4002	6.55222	10.4984	18.0595	20.6399	94.6489	82.5738	64.2659	3.75914	2.97412	3.24216	4.32918	5.51215	5.81838	6.00011	6.10469
ASRNV20035376	1.99012e-06	0.000584305	4.79567	down	noncoding	long noncoding	XR_341542	LOC102546383	RefSeq model	555	chr17	+	29299434	29308226	CTCCCTGCACTTGATACTTTGTGTATTAATCTAGCTTTGTTCTGTCTGCCTCTTTAAAAC	102546383	intergenic							19.3355	99.7019	4.24005	6.50178	21.0772	14.8643	23.0709	18.3294	33.0237	142.235	123.728	99.8212	4.21087	4.10656	4.28848	4.35428	6.23071	6.42565	6.57754	6.77322
ASRNV20035376	1.28299e-05	0.00139792	4.73098	down	noncoding	long noncoding	XR_596556	LOC102554419	RefSeq model	760	chr16	+	83457539	83460516	ATGATGCCCGTGGATGCTTACTGTAGCCTCCTGACCTTTGTGTTTCTGTGTGGAGCAGCA	102554419	intergenic							21.4942	105.555	4.41606	6.6582	24.0958	20.1029	19.4521	22.3258	44.5595	145.84	119.184	112.638	4.39355	4.56478	4.04926	4.65664	6.69053	6.46419	6.52594	6.95214
ASRNV20035376	8.54388e-06	0.00111947	4.713	down	noncoding	long noncoding	XR_338905	LOC102550454	RefSeq model	1006	chr10	-	97191045	97200313	TTCAATTTCCTCCCGAAATCCAGACTTGGGGATTTCCTTAAAGACCTGCCATTCTTTTCC	102550454	intergenic							5	28.0101	2.34756	4.58421	5	5	5	5	8.6179	38.7077	41.8187	22.8959	2.33557	2.36227	2.33678	2.35563	4.2496	4.51805	5.02163	4.54756
ASRNV20032465	2.00125e-05	0.00187747	4.6368	down	noncoding	pseudogene	ENSRNOT00000074553	AABR06076649.1	Ensembl	483	chr13	-	108048879	108049367	TGGATAACTCTCCCCTTCAGCTTTTCAGCGCCTGTCATATTTGAAAATCACCTTTTATAG		intergenic							10.8238	56.3008	3.41005	5.62318	14.5207	7.82905	10.5402	10.4053	16.8138	84.106	67.6552	56.6284	3.67495	3.20713	3.24681	3.51133	5.21929	5.64576	5.71012	5.91755
ASRNV20036407	0.000423331	0.0132622	4.61283	down	noncoding	long noncoding	XR_591757	LOC102554820	RefSeq model	971	chr3	+	151953348	151963597	AGTTGCTCAGGTCCCAGAAAGCCTTTTTCTCCGCATTCAAATTCAGTGGTCAGCCCTTGG	102554820	intergenic							7.21899	37.346	2.8109	5.01655	7.13168	5	5.50298	11.2413	11.1999	57.0627	45.3146	35.8069	2.76244	2.36227	2.48824	3.63064	4.62655	5.0848	5.13849	5.21635
ASRNV20027147	3.76786e-06	0.000711202	4.58741	down	noncoding	long noncoding	XR_597600	LOC103690830	RefSeq model	1348	chrX	-	42466493	42573443	TTTGGCTTCCTGCCTCACAATCTTTGAGTTACCTCATTTCCCTCTAAAATACTTTCAAGT	103690830	intergenic							11.3382	55.0854	3.48469	5.68237	12.3213	8.20758	11.7763	13.0475	23.4252	78.431	65.4056	53.0797	3.44654	3.27382	3.3756	3.84281	5.7105	5.54058	5.65984	5.81858
ASRNV20037233	7.98756e-07	0.000392717	4.57946	down	noncoding	long noncoding	XR_590039	Zfp551	RefSeq model	2564	chr1	+	67682375	67694230	TGACTCCCTCTTCTGCTTTTGAAGGAACCCAAACAGGTACTCCTTCTCCACAAACACACA	682964	exon sense-overlapping	ENSRNOT00000074063	Zfp551	zinc finger protein 551	+	67682618	67689655	21.014	99.3431	4.38429	6.57947	22.4556	19.3121	22.1093	20.1791	45.4386	139.673	116.852	95.409	4.30071	4.50804	4.22671	4.50169	6.71673	6.40164	6.49688	6.70262
uc.182-_P1	6.54842e-05	0.0039639	4.48389	down	noncoding	long noncoding	XR_589275	LOC102555358	RefSeq model	1125	chr9	+	79575486	79581663	TGAAAACTTTGTCTCATGTCATCTGATATCGTGACCCCAAAGTGCCTCTGTGAACCTCAC	102555358	natural antisense	ENSRNOT00000022076	March4	membrane associated ring-CH-type finger 4	-	79555876	79670952	6.9925	34.9917	2.83805	5.0028	9.78079	7.73243	5	5.45678	14.0434	52.2326	37.4087	36.2821	3.15946	3.18988	2.33678	2.66608	4.94819	4.96061	4.8645	5.23791
ASRNV20030868	0.00107742	0.0260569	4.48081	down	noncoding	long noncoding	XR_589161	LOC102550775	RefSeq model	143	chr8	+	129414106	129428900	TGCTCACATGGGGAGTTCTGGGAGGAGCCGAGAGTAGCCCACTGTCCACCTTTGGACCTG	102550775	intergenic							10.8419	53.1602	3.38476	5.54852	13.3038	12.476	5	12.588	17.5082	79.325	68.7375	47.07	3.55663	3.85388	2.33678	3.79176	5.27562	5.55916	5.73222	5.62709
ASRNV20030581	3.06834e-06	0.000666215	4.4429	down	noncoding	long noncoding	XR_594624	LOC103693293	RefSeq model	2517	chr10	+	16000314	16003735	CCTGCCTCTCATTACTGTACTTGCTACCCTGCCTATGTATTATGAATTAATATAGTTAAT	103693293	intergenic							21.9071	101.455	4.4136	6.56511	25.5148	15.3689	23.7749	22.9696	38.8842	145.284	124.555	97.096	4.46855	4.15988	4.32759	4.6984	6.4821	6.45954	6.58761	6.73117
ASRNV20027461	2.82774e-05	0.00223726	4.4131	down	noncoding	long noncoding	XR_591211	LOC103691629	RefSeq model	903	chr2	+	211828448	211830309	CATGGTATCCAGAGCTATTGTCCTCTTTTAGAAGTGTGTGTCTTTTCTTTGATGTTATAT	103691629	exon sense-overlapping	ENSRNOT00000012464	Lce1d	late cornified envelope 1D	+	211829537	211829897	5.54947	28.1542	2.45707	4.59886	7.19787	5	5	5	7.95636	42.5372	33.8161	28.3071	2.77361	2.36227	2.33678	2.35563	4.14749	4.65994	4.71945	4.86857
ASRNV20031372	9.00543e-05	0.00486966	4.38486	down	noncoding	long noncoding	XR_599211	LOC103693309	RefSeq model	150	chr10	-	29695908	29716196	TGACTGTGAAGCTTACCCTAGGCAACCAGTGTGTTTTGATTGGCTCCTGAAGCTTTGTGG	103693309	intergenic							5	27.257	2.34756	4.48009	5	5	5	5	6.28037	40.5497	38.1007	24.097	2.33557	2.36227	2.33678	2.35563	3.81963	4.58579	4.89102	4.62394
ASRNV20036550	1.09664e-06	0.000405403	4.38256	down	noncoding	long noncoding	XR_593937	LOC103690224	RefSeq model	1386	chr8	+	62323366	62344600	GAAAACTGGCAGCTCTTTTGTGACTTCCCTAGGATTCATGTTGTGGCTTGAACAACTGCT	103690224	intergenic							5.15272	26.7348	2.43314	4.56491	5	5	5	5.61088	9.59004	41.1383	33.338	22.873	2.33557	2.36227	2.33678	2.69794	4.40505	4.60766	4.70024	4.5467
ASRNV20036550	2.38811e-05	0.00204292	4.3432	down	noncoding	long noncoding	XR_349546	LOC102548856	RefSeq model	902	chr3	+	158722193	158724161	TTTTGAGCAGTGGCATTAAAGTGCTTGCATCAGGCTCTTCTCTGGGACCTTGAAAGAAAC	102548856	exon sense-overlapping	NM_001013923	Ndrg3	NDRG family member 3	+	158614194	158725392	8.52762	40.09	3.09355	5.21231	12.0596	8.47197	6.78839	6.79052	17.5728	62.0793	41.4526	39.2552	3.41606	3.31455	2.70269	2.94091	5.28065	5.20306	5.00923	5.35631
ASRNV20036550	2.38811e-05	0.00204292	4.3432	down	noncoding	long noncoding	XR_349546	LOC102548856	RefSeq model	902	chr3	+	158722193	158724161	TTTTGAGCAGTGGCATTAAAGTGCTTGCATCAGGCTCTTCTCTGGGACCTTGAAAGAAAC	102548856	intron sense-overlapping	NM_001172118	Sla2	Src-like-adaptor 2	+	158708068	158752778	8.52762	40.09	3.09355	5.21231	12.0596	8.47197	6.78839	6.79052	17.5728	62.0793	41.4526	39.2552	3.41606	3.31455	2.70269	2.94091	5.28065	5.20306	5.00923	5.35631
uc.228+_P1	9.7007e-07	0.000392717	4.32381	down	noncoding	long noncoding	XR_591389	LOC103691728	RefSeq model	2498	chr2	+	270422998	270453689	GCCTCTCTGAAGGAATTCAAAAGCTGTCAGACTAAAGCCTTCCTTGTTAAAATACTGTTT	103691728	intronic antisense	NM_001134736	Wdr63	WD repeat domain 63	-	270435971	270494382	5	24.7624	2.34756	4.45987	5	5	5	5	8.33413	35.8432	29.4641	25.4082	2.33557	2.36227	2.33678	2.35563	4.21047	4.39805	4.52364	4.70731
ASRNV20036651	0.000190211	0.00757259	4.29103	down	noncoding	long noncoding	XR_341445	LOC102548497	RefSeq model	1983	chr17	+	16357351	16433420	ATTCCACTTTACACCCTAGTACCTTTGATCGGTACCCTTCAGTGTTTTCCATGATCCGGA	102548497	natural antisense	ENSRNOT00000071112	AABR06090512.1		-	16432985	16437823	7.06426	34.4534	2.79148	4.89281	11.0419	6.77157	5.44355	5	10.3919	52.9209	44.2297	30.2711	3.30972	3.02048	2.48008	2.35563	4.51642	4.98052	5.10463	4.96965
ASRNV20034214	0.000390276	0.0127437	4.28791	down	noncoding	long noncoding	XR_591168	LOC103691599	RefSeq model	2916	chr2	-	203896349	203912532	ATTCCCAAATGTGTACCAGGTCCCTCTTTGCCAGCAATCATTAGGTTCAGAAAGCTCAGA	103691599	intergenic							14.9161	68.5355	3.86763	5.9679	16.333	16.1533	9.16797	18.01	25.4872	102.407	78.3583	67.8897	3.83967	4.23458	3.07084	4.32541	5.83705	5.92934	5.91944	6.18577
ASRNV20028377	6.7189e-05	0.00399706	4.27075	down	noncoding	long noncoding	XR_591058	LOC102549944	RefSeq model	1383	chr2	+	144679308	144680941	AACATCGATTGTGGTTTACACATGAGTGAAAATGAAGTCTCAGCCTTCCTGCTCTCGGCT	102549944	intergenic							11.7634	55.4975	3.53824	5.63273	10.9858	9.11575	11.4465	15.5056	18.8044	80.2634	69.1265	53.7958	3.30191	3.40479	3.34368	4.10257	5.37507	5.57432	5.74142	5.8401
ASRNV20031760	1.51989e-05	0.00156662	4.263	down	noncoding	long noncoding	XR_589054	LOC102554276	RefSeq model	2283	chr8	-	90322459	90324962	TGTGATTTCCTTCACCTTGAACCATGCCCGTGACAGAAGCTGCTCAGATGTTTGTAAGTT	102554276	intergenic							5	25.2113	2.34756	4.43943	5	5	5	5	7.04848	36.8777	30.6981	26.2207	2.33557	2.36227	2.33678	2.35563	3.98072	4.43945	4.58563	4.75192
uc.258+_P1	0.000585443	0.0170702	4.26068	down	noncoding	long noncoding	XR_339554	LOC102551526	RefSeq model	963	chr12	-	44365601	44367849	CTGCTGTTCCCTGGCTGTTTAAAGTGTTACCTCTTCTAGAAAAGTGAGGATTCCTGGGGG	102551526	intergenic							24.5437	106.598	4.54506	6.63614	27.7674	16.7868	17.7051	35.9154	40.4362	156.175	125.978	103.801	4.5782	4.29228	3.92529	5.38447	6.54659	6.56111	6.6032	6.83368
ASRNV20028754	1.61302e-07	0.000252742	4.18161	down	noncoding	long noncoding	XR_600398	LOC103691925	RefSeq model	1292	chr3	+	151588696	151622141	GGAAGCATGTGCTGGGACATTGATATAACTCCATTCTTCTTCTTTTCTTCTTGGGTAAAA	103691925	intergenic							5	23.7498	2.34756	4.41162	5	5	5	5	8.59472	35.0323	27.5299	23.8423	2.33557	2.36227	2.33678	2.35563	4.24567	4.36542	4.42795	4.60745
ASRNV20032044	9.14796e-07	0.000392717	4.177	down	noncoding	long noncoding	XR_595884	LOC103693775	RefSeq model	1816	chr15	-	102342574	102346646	TCAATCATGATTTCTGTCTTGTTTCCCGGGTCTTACTGCTACCAGTTTATAAAATGAATG	103693775	intergenic							5	23.9575	2.34756	4.41003	5	5	5	5	8.06885	35.6543	27.4528	24.6541	2.33557	2.36227	2.33678	2.35563	4.16653	4.3894	4.42355	4.66063
ASRNV20029581	1.82161e-05	0.00177584	4.17364	down	noncoding	long noncoding	XR_593427	LOC103692851	RefSeq model	2030	chr7	+	54114060	54117752	CATTTCCCCACCTCTTGCTTCAGAGACAACTTCCTAAATGGAGGTTTCCTTCCTAGATGT	103692851	intergenic							10.0903	45.7005	3.33526	5.39657	11.4193	11.8064	9.33433	7.80107	19.1687	63.281	59.1319	41.2206	3.35325	3.77301	3.09287	3.12192	5.4011	5.23091	5.52393	5.43034
ASRNV20030484	0.000413516	0.0132073	4.17019	down	noncoding	long noncoding	XR_596932	LOC102547510	RefSeq model	1802	chr18	-	19361959	19453046	TGTTTTCCTTTCTGATAGGGTGAAGGGAAGTCTGTGTCTATCTCCATGCCTCAAGCTCAT	102547510	intergenic							10.3654	45.9882	3.31502	5.37514	12.0521	13.6512	10.4959	5.26242	16.5499	68.0658	52.9075	46.4296	3.41508	3.98251	3.24195	2.62055	5.19566	5.33706	5.3619	5.60593
ASRNV20034123	5.99167e-07	0.000344554	4.13731	down	noncoding	long noncoding	XR_591322	RGD1306519	RefSeq model	2752	chr2	-	247998416	248017232	TGTCATAAAGTCTTTTAAAACAGATGCCAGAACCCAACGTCCTCCTTGTGAGACACCTCC	295437	exon sense-overlapping	ENSRNOT00000034173	RGD1306519	similar to T-cell activation Rho GTPase-activating protein isoform b	-	247998285	248016004	5	22.7908	2.34756	4.39625	5	5	5	5	9.60537	31.1751	26.0149	24.368	2.33557	2.36227	2.33678	2.35563	4.40765	4.19137	4.34457	4.64143
ASRNV20034123	5.99167e-07	0.000344554	4.13731	down	noncoding	long noncoding	XR_591322	RGD1306519	RefSeq model	2752	chr2	-	247998416	248017232	TGTCATAAAGTCTTTTAAAACAGATGCCAGAACCCAACGTCCTCCTTGTGAGACACCTCC	295437	exon sense-overlapping	ENSRNOT00000055648	RGD1306519	similar to T-cell activation Rho GTPase-activating protein isoform b	-	247998285	248016041	5	22.7908	2.34756	4.39625	5	5	5	5	9.60537	31.1751	26.0149	24.368	2.33557	2.36227	2.33678	2.35563	4.40765	4.19137	4.34457	4.64143
ASRNV20034123	0.00234568	0.0428221	4.13047	down	noncoding	long noncoding	XR_595035	LOC103693544	RefSeq model	896	chr15	+	36422581	36423646	ATTCTATAATCAGCTTCTTACCTACTGTTCCCCAATAAAACACTGAGTGCTGTAGTCAAG	103693544	exon sense-overlapping	ENSRNOT00000072962	LOC100364854		+	36423075	36667380	10.9712	50.6873	3.37993	5.42624	9.78763	5.86506	10.3435	17.8887	12.733	73.508	56.8827	59.6254	3.16028	2.81991	3.22307	4.31648	4.80216	5.44596	5.46544	5.99139
ASRNV20034123	9.48032e-05	0.00498126	4.09003	down	noncoding	long noncoding	XR_600057	LOC102553411	RefSeq model	1181	chr2	-	278662891	278670794	AATTGAATAGCCACCCAGGGACAAGCAGAACATTTCTACTTCAACTCTGACGCATACGAG	102553411	intergenic							5.79794	26.3441	2.58594	4.61806	5.93706	5.69375	6.56094	5	11.9635	35.3503	24.0347	34.028	2.54293	2.78442	2.66079	2.35563	4.71538	4.37645	4.23669	5.14371
ASRNV20034123	3.28278e-06	0.000666215	4.05686	down	noncoding	long noncoding	XR_590252	LOC102555555	RefSeq model	2733	chr1	-	122021169	122055314	AAGTGGATCCCTTCCCATTGATACCAGACAATAGGTTCTACAGTTCCCAGTGATTTGGGA	102555555	intergenic							5.12955	24.1404	2.4423	4.46266	5	5.5182	5	5	9.79239	36.0248	25.9201	24.8242	2.33557	2.74122	2.33678	2.35563	4.43421	4.40382	4.34077	4.67186
ASRNV20034123	0.000327253	0.0113291	4.039	down	noncoding	long noncoding	XR_592267	LOC102553636	RefSeq model	812	chr4	-	224110374	224117826	TAGGGGAATTTGAGGACTCAATGGTTTTTACTCTTATGCCTTTTACTCTGTCCAGGCCCC	102553636	intergenic							5.95114	27.4119	2.57866	4.59266	5	5	5	8.80457	8.77877	41.1366	29.5013	30.2309	2.33557	2.36227	2.33678	3.28003	4.27182	4.60735	4.52514	4.96633
ASRNV20031540	0.000722975	0.019903	4.02604	down	noncoding	long noncoding	XR_597121	LOC102548009	RefSeq model	890	chr19	+	8285221	8313650	TTCAGGCTTCTTGCATTCATTTACCTTTGGTGTCCTACAAGGTCATTCTCTGCTACATAT	102548009	intergenic							6.66735	30.494	2.71052	4.71988	5	5	6.87374	9.79565	8.56361	43.9633	34.7839	34.6652	2.33557	2.36227	2.71751	3.42671	4.24158	4.70871	4.76074	5.16848
ASRNV20030090	5.72832e-05	0.00361548	4.01344	down	noncoding	long noncoding	XR_589285	LOC102551519	RefSeq model	274	chr9	-	83552062	83553444	AGTCTCACGTTTGAACCAATGACCCTCATCTCTTACTGTCATCAATTTACTCTTCTTAAT	102551519	intergenic							5.4024	26.0332	2.50312	4.50796	5	6.60958	5	5	8.11817	39.9298	29.969	26.116	2.33557	2.98449	2.33678	2.35563	4.17448	4.56376	4.55096	4.74263
ASRNV20034667	0.000500473	0.0152365	4.00809	down	noncoding	long noncoding	XR_596412	LOC103693916	RefSeq model	2010	chr16	-	19735917	19737972	CATGGCCTCTACCTTACTTCCTGAACTACTTACTAAATTTTATTGTGTGTGAGTGGTGAA	103693916	natural antisense	NM_001006965	Mrpl34	mitochondrial ribosomal protein L34	+	19735399	19736135	11.5954	50.2922	3.42297	5.42588	19.5742	8.36314	11.8133	6.63097	15.2214	71.5017	74.4484	39.9972	4.10319	3.29759	3.38016	2.91092	5.07124	5.40298	5.8438	5.3855
ASRNV20035524	2.34979e-07	0.000252742	3.99521	down	noncoding	long noncoding	XR_351843	LOC100363520	RefSeq model	1893	chr2	+	216085399	216089172	TGGTTGTCTTGTGTTTCTGCCTCTTCTGTCCAAAGTTTAGCAAAAGTGGCTAATGGTCAC	100363520	intergenic							26.7558	112.716	4.70794	6.70621	33.5641	23.0277	27.8196	22.6119	42.3376	172.054	132.729	103.744	4.8328	4.77871	4.54653	4.67371	6.6128	6.69851	6.681	6.83254
ASRNV20032929	9.86441e-07	0.000392717	3.94199	down	noncoding	long noncoding	XR_346991	LOC102548368	RefSeq model	595	chr6	+	7083243	7100585	AGCCCCCGATCTGCTGCTCTAGTGACTGGTGTGTTTCTCTTGTTAATGTGGTCACTCCAG	102548368	intergenic							24.9573	99.6241	4.57823	6.55715	25.6117	19.5015	35.0439	19.6722	42.6177	148.457	118.193	89.2288	4.4736	4.5232	4.85494	4.46117	6.62231	6.49115	6.51553	6.59962
ASRNV20032929	0.000874957	0.0226984	3.91836	down	noncoding	long noncoding	XR_593944	LOC103693107	RefSeq model	2064	chr8	+	63622142	63669064	AGGAACGGACACCTACTGCCTTCTGCATACATATACAAGAGAAGTTACCCTTGCTTCACT	103693107	intergenic							7.56165	31.6893	2.85194	4.82219	6.19398	5	6.79804	12.2546	10.8852	45.5193	39.1311	31.2216	2.58996	2.36227	2.70418	3.75135	4.58744	4.75793	4.92836	5.01503
ASRNV20028785	4.89982e-06	0.000831464	3.8713	down	noncoding	long noncoding	XR_344013	LOC102555062	RefSeq model	1391	chr2	-	13556160	13580893	TTACAGGTAAACATACAGAATAATTCACATTGCTTCACCCAGATGTGCTCAGGGGCAGAA	102555062	intergenic							5.26872	23.7047	2.47981	4.43262	5.53892	5.53595	5	5	9.09341	33.2737	27.5736	24.878	2.4814	2.74542	2.33678	2.35563	4.3324	4.2922	4.43043	4.67545
ASRNV20034382	5.50998e-06	0.000874469	3.84179	down	noncoding	long noncoding	XR_591209	LOC103691626	RefSeq model	661	chr2	+	211786527	211809107	CAATCCCTCCTTTCTTCTTTGTTATAAATTAATAAAGCCTTGACAATCATCCCTGACAAG	103691626	exon sense-overlapping	ENSRNOT00000072995	LOC679475		+	211770784	211808896	11.4447	46.5453	3.4936	5.43538	11.6212	12.0092	13.3724	8.77603	20.5655	64.4791	59.6808	41.4559	3.37215	3.79476	3.53154	3.27595	5.50765	5.25925	5.53705	5.43756
uc.350+_P1	5.50998e-06	0.000874469	3.84179	down	noncoding	long noncoding	XR_591209	LOC103691626	RefSeq model	661	chr2	+	211786527	211809107	CAATCCCTCCTTTCTTCTTTGTTATAAATTAATAAAGCCTTGACAATCATCCCTGACAAG	103691626	intron sense-overlapping	ENSRNOT00000065242	LOC679475		+	211770784	211787935	11.4447	46.5453	3.4936	5.43538	11.6212	12.0092	13.3724	8.77603	20.5655	64.4791	59.6808	41.4559	3.37215	3.79476	3.53154	3.27595	5.50765	5.25925	5.53705	5.43756
ASRNV20008490	1.40764e-05	0.00147177	3.81752	down	noncoding	long noncoding	XR_596564	LOC103694011	RefSeq model	1468	chr16	+	86230014	86259860	CAGAGAAGCAAAATACTTCTTTTAATTAAGGCCAAGACCTCTCCACTTTAAGTTGTGAAA	103694011	intergenic							5.21716	24.1332	2.46234	4.39498	5	5.86865	5	5	7.76757	38.357	28.5032	21.905	2.33557	2.8214	2.33678	2.35563	4.11885	4.50539	4.47902	4.47666
ASRNV20035237	0.00039602	0.012815	3.81224	down	noncoding	long noncoding	XR_339962	LOC102552174	RefSeq model	1097	chr13	-	108919408	108928420	TTGGGTTTTTCCTTAGCTATTGCTGTCTGACACAGACACTCCCTGCTTTACACTTTTGCC	102552174	intergenic							9.94664	40.0501	3.29619	5.22683	9.59769	14.6197	8.55613	7.01299	17.7948	54.4747	49.9843	37.9467	3.13664	4.07992	2.98865	2.97957	5.29904	5.02289	5.27593	5.30948
ASRNV20035827	7.9048e-05	0.00442284	3.79095	down	noncoding	long noncoding	XR_341316	LOC102553373	RefSeq model	1509	chr17	+	7210249	7216470	GCCATACACCCTTCTGGACTGGAATGCACTGTAGGAGAACATATCCTTTCTATCATCTAT	102553373	intergenic							5	23.365	2.34756	4.27012	5	5	5	5	5.76368	35.8373	31.5465	20.3127	2.33557	2.36227	2.33678	2.35563	3.68575	4.39719	4.62542	4.37212
ASRNV20035827	1.78469e-05	0.00177584	3.76919	down	noncoding	long noncoding	XR_594830	LOC102552078	RefSeq model	2104	chr10	+	67761960	67768750	ATTGGACTTTCTAAACAAGTTTTGCTTCTCCAATGAAGGCACCTGTTTTCCTTTTCCTCT	102552078	intronic antisense	NM_012983	Myo1d	myosin ID	-	67520648	67811744	5	22.0579	2.34756	4.26182	5	5	5	5	6.50447	31.6125	26.1348	23.9797	2.33557	2.36227	2.33678	2.35563	3.86704	4.21295	4.35162	4.61566
ASRNV20027034	0.000746425	0.020173	3.75188	down	noncoding	long noncoding	XR_354472	Tnfrsf14	RefSeq model	2947	chr5	-	175784221	175792279	AAAGACCAAGTTCCCAGTTCCCTGAGGGGTTCCTATTTCAGACTGTCTATCAGAAAACTC	366518	exon sense-overlapping	NM_001015034	Tnfrsf14	tumor necrosis factor receptor superfamily, member 14	-	175784221	175791855	6.18701	31.1978	2.73565	4.64326	5.09262	6.49778	6.81228	6.34535	6.29104	52.0572	35.0386	31.4044	2.41769	2.96232	2.70677	2.8558	3.82203	4.9563	4.77205	5.02267
ASRNV20027860	0.00244485	0.0440882	3.72709	down	noncoding	long noncoding	XR_596356	LOC102554645	RefSeq model	2368	chr16	+	4952645	4970108	AGGAGCTTTGGGTACACACTTAGAGACAACAAATAGGACCTGCCTTTCTTATCCCCTCAA	102554645	intronic antisense	ENSRNOT00000048043	Cacna2d3		-	4812760	5730476	10.9759	47.211	3.41321	5.31126	9.65337	8.58911	7.69104	17.9703	11.9132	71.4848	58.4801	46.9659	3.1447	3.33161	2.85399	4.32253	4.70871	5.40273	5.50867	5.62491
ASRNV20027860	0.00244485	0.0440882	3.72709	down	noncoding	long noncoding	XR_596356	LOC102554645	RefSeq model	2368	chr16	+	4952645	4970108	AGGAGCTTTGGGTACACACTTAGAGACAACAAATAGGACCTGCCTTTCTTATCCCCTCAA	102554645	intronic antisense	NM_175595	Cacna2d3	calcium voltage-gated channel auxiliary subunit alpha2delta 3	-	4812760	5730475	10.9759	47.211	3.41321	5.31126	9.65337	8.58911	7.69104	17.9703	11.9132	71.4848	58.4801	46.9659	3.1447	3.33161	2.85399	4.32253	4.70871	5.40273	5.50867	5.62491
ASRNV20032329	9.32303e-05	0.00495571	3.67265	down	noncoding	long noncoding	XR_346477	LOC102550553	RefSeq model	1212	chr5	+	66293560	66299043	GTAGCAGATTCACAGCCCTCCTTCTATTCCAGCCCTAAATAAAACCATGTTTTAAGTTTT	102550553	natural antisense	NM_001106656	Xpa	xeroderma pigmentosum, complementation group A	-	66266228	66309390	23.0544	89.6057	4.50718	6.384	17.913	25.9952	26.7932	21.5161	37.3534	134.935	110.339	75.7953	3.9763	4.9602	4.49188	4.60034	6.42079	6.35123	6.40891	6.35508
ASRNV20031766	3.08889e-06	0.000666215	3.64834	down	noncoding	long noncoding	XR_596457	LOC102552351	RefSeq model	1614	chr16	-	46216473	46228312	CTATTTAGCCCATGACTCTATCCACGCTTCTTGCAAAAGCCTTACCTTTAGTGTAAATGG	102552351	intronic antisense	NM_001169133	Tenm3	teneurin transmembrane protein 3	+	46157682	46657495	5.07569	21.346	2.37627	4.24351	5.30277	5	5	5	7.12144	31.4754	24.1907	22.5964	2.45042	2.36227	2.33678	2.35563	3.99342	4.20607	4.24667	4.5279
uc.448-_P1	0.000231219	0.00873486	3.61911	down	noncoding	long noncoding	XR_591431	LOC103691748	RefSeq model	517	chr3	+	2661951	2663512	CTGCTGGTTTTGTTTGCTTGCTCTGTTTTGTTTGTTTTGCCAATGTGAGTGAAAAATTTT	103691748	bidirectional	NM_001106556	RGD1306215	similar to hypothetical protein MGC36831	-	2660401	2661945	30.097	107.272	4.7404	6.59603	37.882	18.637	46.3606	17.5084	35.8343	160.397	139.107	93.7506	4.99804	4.45856	5.22296	4.28204	6.35679	6.60045	6.7491	6.6778
ASRNV20034406	0.000100878	0.00516926	3.57793	down	noncoding	long noncoding	XR_591998	LOC100912617	RefSeq model	908	chr13	-	88101206	88108254	TATTATGTCTGTGTCACAAAAGGGCAGGAAACCACAACTCTGAAGACTTGGAGGACTTGG	100912617	intergenic							6.11927	22.8131	2.56901	4.40814	7.18722	5	7.28984	5	11.2926	35.9795	19.6076	24.3728	2.77146	2.36227	2.7867	2.35563	4.63818	4.40171	3.95067	4.64199
ASRNV20007744	6.81756e-05	0.00403249	3.5021	down	noncoding	long noncoding	XR_342251	LOC102547565	RefSeq model	2302	chr19	-	32178532	32183521	TTGTTTCTGTTGTCTGGATGAGAAATGCCCACCCTAGGCTTGTATTTGAGTACTTGGTCC	102547565	intergenic							6.2587	24.1635	2.65301	4.46124	8.98575	6.04903	5	5	9.82617	36.1916	27.2472	23.389	3.05685	2.8628	2.33678	2.35563	4.43893	4.41113	4.41284	4.58204
ASRNV20033444	0.000308937	0.0109514	3.48372	down	noncoding	long noncoding	XR_595328	LOC103693642	RefSeq model	134	chr15	+	50001895	50002289	AAGCCATTTAGAAGAGGAAGCTCACTGGGGACTTTCTCACAGCAGTCTCTGGTCAGATGA	103693642	intergenic							8.38787	30.9894	3.00517	4.8058	11.3781	8.25855	8.91484	5	12.7597	43.9876	42.5871	24.6233	3.34705	3.28259	3.0354	2.35563	4.8044	4.70972	5.05033	4.65874
ASRNV20036215	0.000520125	0.0156162	3.48344	down	noncoding	long noncoding	XR_594979	LOC103693506	RefSeq model	543	chr11	+	18885072	18917735	TTCCAACTTAACACCCAGTAAGAATAATTTGCCCCTCAATTTCTTCTTCTCTTTGAACAG	103693506	intergenic							6.50083	26.2231	2.69462	4.49514	5	6.624	9.37932	5	7.22897	38.865	31.1147	27.6836	2.33557	2.98629	3.10101	2.35563	4.01324	4.52347	4.60633	4.8375
ASRNV20008490	6.71905e-05	0.00399706	3.4783	down	noncoding	long noncoding	XR_590248	LOC102554833	RefSeq model	2505	chr1	-	120650839	120716362	ATAGTCCTGGCTGTAGTTAAAAACAATTCTTACCATCTTTCTATGACTCTCAGGTGTTAA	102554833	intergenic							6.0045	24.4083	2.60404	4.40242	8.5036	5.51439	5	5	7.76897	39.6089	28.9607	21.2945	2.98341	2.74035	2.33678	2.35563	4.11902	4.55032	4.50072	4.43964
ASRNV20031302	2.24765e-07	0.000252742	3.46924	down	noncoding	long noncoding	XR_601302	LOC103692544	RefSeq model	1181	chr6	+	6378038	6379796	GGGGTGAAGAAAAAATAATTCCAACCGACACGTCTTGTTTTGGTTTGTTTTTGTTTTGAA	103692544	intergenic							5	19.1635	2.34756	4.14218	5	5	5	5	8.14639	28.1985	20.6711	19.6381	2.33557	2.36227	2.33678	2.35563	4.17922	4.04843	4.01911	4.32196
uc.51+_P1	0.00107487	0.0260569	3.45671	down	noncoding	long noncoding	XR_594018	LOC103693139	RefSeq model	2306	chr8	+	74014675	74017174	TTATCAATGAAACATAAATATGTCAGTATGTCAAACTCACAGGCTGGTTCCCTGTCCAAC	103693139	intronic antisense	NM_001007752	Mns1	meiosis-specific nuclear structural 1	-	74012276	74033156	8.77569	33.95	3.1241	4.9135	5.93501	7.00435	8.41311	13.7503	11.5389	52.3535	38.2571	33.6507	2.54257	3.0646	2.96679	3.92243	4.66708	4.96484	4.8965	5.12558
ASRNV20031567	0.000292278	0.0104526	3.43846	down	noncoding	long noncoding	XR_591403	LOC102548445	RefSeq model	339	chr2	+	275441366	275450940	ATTGGATACATGGAACTGAACTCCTCCTAATCTCCACTTCGCATTATTACCAGCACCTGG	102548445	intergenic							16.7495	60.1874	4.01533	5.79709	18.816	10.7162	16.5826	20.8835	24.229	73.8257	86.0827	56.6124	4.05239	3.622	3.83484	4.55208	5.76101	5.45282	6.05727	5.91726
ASRNV20036387	5.66027e-06	0.000874469	3.43617	down	noncoding	long noncoding	XR_340615	LOC102554488	RefSeq model	1132	chr15	-	29272871	29285925	TTTAATCACTGATCACTTATGATGGACATAGAACTCTGCCCTTGAGAAGCTCAATTATAT	102554488	natural antisense	NM_001170475	Tmem260	transmembrane protein 260	+	29220348	29287363	5.19427	20.658	2.39495	4.17575	5	5	5.77708	5	6.53707	32.0983	23.215	20.7817	2.33557	2.36227	2.52632	2.35563	3.87429	4.23884	4.1858	4.40406
ASRNV20036387	2.38029e-05	0.00204292	3.41678	down	noncoding	pseudogene	ENSRNOT00000072488	AABR06044066.1	Ensembl	249	chr6	+	84457698	84457949	CGTGGGTCCCATTGCAGTTTCTGTGTGTTCCTATATGCAGTGTATGCTAAGCTACTGTAG		intergenic							12.5789	46.0258	3.62099	5.39363	15.3374	9.03544	11.9809	13.9617	18.1333	69.2193	50.8088	45.9419	3.75301	3.39333	3.39412	3.9435	5.32539	5.3597	5.30175	5.58766
uc.252+_P1	0.000163704	0.00683267	3.40964	down	noncoding	long noncoding	XR_357594	LOC102550517	RefSeq model	665	chr10	-	38426207	38426857	GCTTTTTGGGTGATTGCTCTTACTGGATCTGTCCTCTAGCAATACCACACTTACTATGGG	102550517	intergenic							7.31018	28.8401	2.9138	4.68342	9.151	6.91007	5	8.17963	10.2763	45.8865	30.6968	28.5007	3.08055	3.04712	2.33678	3.19074	4.50161	4.77052	4.58471	4.87684
ASRNV20029422	0.00159209	0.03387	3.40857	down	noncoding	long noncoding	XR_343203	LOC102548732	RefSeq model	2980	chr1	-	190829329	190835954	ACTCTGTGCTTCCTAGCCACCATGCTGTGCTCTTCTTTTTTAAATTCTTAAGTGACTTTA	102548732	intergenic							23.5662	82.5999	4.47844	6.24761	16.4379	15.9051	27.8227	34.0993	29.8936	122.292	93.3863	84.8278	3.84942	4.21162	4.54681	5.30592	6.08131	6.21256	6.17426	6.52231
ASRNV20032843	0.00118364	0.0277521	3.39476	down	noncoding	long noncoding	XR_346893	LOC102548845	RefSeq model	1011	chr5	+	170896576	170898373	TTCTCTTCTGGCACTTGTCTTTCGTGGTGTAGGAGTTTCAAGGACGATAGCACTAAGGCA	102548845	intergenic							8.96151	35.306	3.16646	4.92977	10.825	8.06156	5.20025	11.7592	10.3058	55.3927	38.7424	36.7831	3.28407	3.24509	2.4434	3.69329	4.50573	5.0447	4.91143	5.25723
ASRNV20032170	6.0395e-09	3.1257e-05	3.38283	down	noncoding	long noncoding	XR_594002	LOC103693137	RefSeq model	1514	chr8	+	75095444	75097195	TATCTGTATATATATCCACTGTCAGCAGCAAATACTCGTAGCCTGCTTTATGTTAACCTT	103693137	intron sense-overlapping	NM_183402	Polr2m	polymerase (RNA) II subunit M	+	75083484	75100271	5	18.8096	2.34756	4.10579	5	5	5	5	7.86945	28.5014	20.8317	18.0359	2.33557	2.36227	2.33678	2.35563	4.13333	4.06321	4.03145	4.19518
ASRNV20036834	0.000194025	0.00766547	3.34748	down	noncoding	long noncoding	XR_349660	LOC102551429	RefSeq model	1206	chrX	-	62760572	62937833	GCTACATTCGGACCGTCAATCTTGTTCTGCCTCTGGCTTTTATTGTGAACTTTGGCTTTG	102551429	intronic antisense	ENSRNOT00000039568	LOC100364596		+	62872591	62873141	8.06404	31.3668	3.05247	4.79555	6.46911	8.1562	8.16264	9.46822	10.1925	46.6226	34.3447	34.3072	2.63967	3.26339	2.92889	3.37794	4.49132	4.79338	4.74329	5.1542
ASRNV20034979	0.000194025	0.00766547	3.34748	down	noncoding	long noncoding	XR_349660	LOC102551429	RefSeq model	1206	chrX	-	62760572	62937833	GCTACATTCGGACCGTCAATCTTGTTCTGCCTCTGGCTTTTATTGTGAACTTTGGCTTTG	102551429	intronic antisense	ENSRNOT00000071396	AABR06104905.1		+	62851556	62852286	8.06404	31.3668	3.05247	4.79555	6.46911	8.1562	8.16264	9.46822	10.1925	46.6226	34.3447	34.3072	2.63967	3.26339	2.92889	3.37794	4.49132	4.79338	4.74329	5.1542
ASRNV20036547	2.88689e-05	0.00226381	3.34701	down	noncoding	long noncoding	XR_589378	LOC103690602	RefSeq model	719	chr11	-	81631744	81634574	AAACACATCAAGACTTTGCCTTGCGCCAATCTACCAATACAGTATCCTGCCGTTGCAAGA	103690602	intergenic							6.38351	23.1384	2.65647	4.39934	9.20027	5	6.21982	5.11395	9.791	34.6253	27.6701	20.4672	3.08602	2.36227	2.59355	2.58403	4.43368	4.34615	4.43573	4.38181
ASRNV20035258	6.33651e-05	0.00390412	3.34571	down	noncoding	long noncoding	XR_593938	LOC103693105	RefSeq model	823	chr8	+	62555784	62558793	TTTGAGTCTGTGCCTCCTGAACTGCCATTCCTAAGACCCCAAATAAACTCCTTTGACTTT	103693105	intergenic							33.8735	112.789	4.98826	6.73057	32.0921	28.6449	51.9401	22.8169	44.3337	163.002	130.997	112.824	4.77572	5.10445	5.38529	4.68757	6.68169	6.62545	6.65935	6.95578
ASRNV20029484	0.000143357	0.00623483	3.30444	down	noncoding	pseudogene	ENSRNOT00000049334	AABR06064041.1	Ensembl	909	chr10	-	44704049	44704959	AAAGTTGTGGCTGTGCTCTACTCTATCATCACCCCTGTTTTGAACCCTTTCATCTACAGC		intergenic							19.4797	67.8839	4.24079	5.9652	26.9204	18.6402	14.7543	17.6041	26.4682	98.9428	82.0863	64.0383	4.53914	4.4591	3.67339	4.29154	5.89041	5.88442	5.98684	6.09913
ASRNV20036935	0.00200561	0.0391751	3.29612	down	noncoding	long noncoding	XR_597459	LOC102554815	RefSeq model	1348	chr20	-	50877937	50918493	AACTGATATGAAATGCTTGCTCTTCTCTAGAGCGATGATTTCTCCCACTCTCAGCATTTC	102554815	intergenic							12.2132	43.9102	3.54413	5.2649	13.3575	17.9116	10.6747	6.90901	14.7501	74.1574	44.2308	42.5024	3.56193	4.39433	3.25882	2.96143	5.02018	5.4585	5.10483	5.47607
ASRNV20031568	1.83571e-05	0.00177584	3.28855	down	noncoding	long noncoding	XR_340652	Khnyn	RefSeq model	2271	chr15	+	38440194	38449341	GTGAGAGAATAGGGCACCAGCTCAGACCTTTCTCTAAACCAGCTCTTCTCTGGCCACTGG	498517	exon sense-overlapping	ENSRNOT00000027802	Khnyn	KH and NYN domain containing	+	38440707	38450025	11.7362	40.3675	3.51197	5.22942	10.193	9.13463	16.6825	10.9348	17.9879	58.6134	48.1301	36.7387	3.20913	3.40819	3.84366	3.58692	5.31479	5.12333	5.2239	5.25568
ASRNV20026902	7.23508e-05	0.00416557	3.28011	down	noncoding	long noncoding	XR_346194	LOC102556981	RefSeq model	1216	chr4	+	232970861	232994006	AGTTGGGGTGTTTTAGCTGGTTTGGTTGCAGGCAGTAGGGAGTAGGATGGGTGGAGCTTT	102556981	intergenic							9.55811	32.0113	3.20132	4.91507	12.7847	6.96746	12.2716	6.20869	14.9257	43.8885	36.9837	32.2471	3.49934	3.05877	3.41889	2.8283	5.04126	4.70657	4.84971	5.06273
ASRNV20033779	0.00178518	0.0360906	3.26905	down	noncoding	long noncoding	XR_593777	LOC103693014	RefSeq model	886	chr8	-	12586406	12592492	TGGAGTTCTGGTCTCCTCTTGCTCTGCGAGAACACGCTCTACCAAGCCTCCTCTTTCAGA	103693014	intergenic							36.379	142.587	5.13817	6.84704	40.8532	35.4295	43.2892	25.944	27.3991	222.932	189.801	130.216	5.10376	5.42517	5.13682	4.88694	5.94679	7.07354	7.18852	7.17932
ASRNV20029862	0.000396174	0.012815	3.26855	down	noncoding	long noncoding	XR_591744	LOC103691925	RefSeq model	2499	chr3	+	151586213	151622141	TGAAAAGCTGCTATAAATCCAGTGTCCCTGAGAAGTGTCATCTGTCCTCTCTCCCTGAAA	103691925	intergenic							42.7264	139.612	5.3479	7.05655	63.0895	42.164	31.7345	33.9174	60.126	218.644	149.453	130.224	5.69177	5.68177	4.71945	5.29859	7.15589	7.04741	6.84332	7.17957
ASRNV20034501	2.50069e-05	0.00208747	3.26843	down	noncoding	long noncoding	XR_596510	LOC103693984	RefSeq model	1905	chr16	+	68217920	68223704	GATTAATAGTGTTGGTTTTCATGATGGCTGCTGGTTCCCTAATTGTGCCTGCCAACTGAG	103693984	exon sense-overlapping	ENSRNOT00000039592	RGD1562638		+	68212742	68268251	27.5614	95.2775	4.77621	6.48481	30.5585	27.5869	26.4956	25.6044	37.6026	131.16	116.562	95.7849	4.70998	5.04932	4.47697	4.86857	6.43023	6.30766	6.49301	6.70833
ASRNV20008902	2.50069e-05	0.00208747	3.26843	down	noncoding	long noncoding	XR_596510	LOC103693984	RefSeq model	1905	chr16	+	68217920	68223704	GATTAATAGTGTTGGTTTTCATGATGGCTGCTGGTTCCCTAATTGTGCCTGCCAACTGAG	103693984	exon sense-overlapping	NM_001100944	RGD1562638	similar to MAP/microtubule affinity-regulating kinase 3	+	68212742	68223695	27.5614	95.2775	4.77621	6.48481	30.5585	27.5869	26.4956	25.6044	37.6026	131.16	116.562	95.7849	4.70998	5.04932	4.47697	4.86857	6.43023	6.30766	6.49301	6.70833
ASRNV20035886	2.50069e-05	0.00208747	3.26843	down	noncoding	long noncoding	XR_596510	LOC103693984	RefSeq model	1905	chr16	+	68217920	68223704	GATTAATAGTGTTGGTTTTCATGATGGCTGCTGGTTCCCTAATTGTGCCTGCCAACTGAG	103693984	intron sense-overlapping	NM_001166307	LOC498592		+	67599685	68434509	27.5614	95.2775	4.77621	6.48481	30.5585	27.5869	26.4956	25.6044	37.6026	131.16	116.562	95.7849	4.70998	5.04932	4.47697	4.86857	6.43023	6.30766	6.49301	6.70833
ASRNV20031566	0.000108144	0.00533045	3.26368	down	noncoding	long noncoding	XR_348007	LOC102551999	RefSeq model	2502	chr7	+	100718695	100733489	ATGATAGTTTTCTTCTCGACCTGCCCTGCACTGTATGTGCACGGAGAATAAATCCGTAGA	102551999	intergenic							11.6891	39.323	3.54019	5.24669	10.7167	10.4585	12.1459	13.4352	22.4108	55.1852	44.355	35.341	3.27101	3.59038	3.40819	3.8912	5.64103	5.03962	5.10811	5.198
ASRNV20031566	5.39827e-05	0.00344923	3.25111	down	noncoding	long noncoding	XR_339543	LOC102549705	RefSeq model	533	chr12	+	41771172	41777716	TAGAAATTGCCTGTGATTTCATAGTCACTGACTTGCTGTCTGGCTTGAGCTTGGCTCTAG	102549705	intronic antisense	ENSRNOT00000050368	Myl2		-	41777253	41835824	5	19.4194	2.34756	4.04849	5	5	5	5	5.31273	28.9448	23.8294	19.5904	2.33557	2.36227	2.33678	2.35563	3.56561	4.08638	4.2233	4.31869
uc.88-_P1	0.000128493	0.00591125	3.22341	down	noncoding	pseudogene	ENSRNOT00000024008	AABR06030145.1	Ensembl	567	chr4	-	53177432	53178001	GTGATTGGCAGAGCAAACAATCATCACTCCTTGTTCCGCCTATGCTACTATAAGAAGTCT		intergenic							5.82346	22.4715	2.5752	4.26379	6.09145	5	6.38963	5.81278	6.06281	32.8583	27.308	23.6567	2.56935	2.36227	2.62648	2.7427	3.77027	4.2731	4.41502	4.59675
ASRNV20035910	8.93442e-05	0.00486966	3.21743	down	noncoding	long noncoding	XR_346568	LOC102551651	RefSeq model	1679	chr5	-	104327107	104337154	TCTGTTATGAAATACAAAATCCTTTTCTCTCTCCCTTGAAATAAAAATCTTAGCAGTGGG	102551651	intergenic							21.3225	72.2958	4.33489	6.0208	24.9305	12.3049	27.0717	20.9831	27.4593	121.798	84.0601	55.8665	4.43925	3.83263	4.50826	4.55943	5.94925	6.20446	6.03011	5.89939
ASRNV20027298	0.00254659	0.0452917	3.20497	down	noncoding	long noncoding	XR_597422	LOC103694435	RefSeq model	814	chr20	+	36404891	36416848	AATTTAAAATATCTCAAGTACTCTTGCCATCACCCATGCTCAGCAGCACTGCACACTGTA	103694435	intronic antisense	ENSRNOT00000066272	AABR06101243.1		-	36407273	36417562	14.7596	48.8195	3.81293	5.49324	20.1908	19.0655	8.60588	11.1763	19.3168	68.0073	57.1299	50.824	4.14675	4.48961	2.9944	3.62096	5.41069	5.33618	5.47234	5.75376
ASRNV20029849	0.00254659	0.0452917	3.20497	down	noncoding	long noncoding	XR_597422	LOC103694435	RefSeq model	814	chr20	+	36404891	36416848	AATTTAAAATATCTCAAGTACTCTTGCCATCACCCATGCTCAGCAGCACTGCACACTGTA	103694435	intronic antisense	NM_001177829	Cep85l	centrosomal protein 85-like	-	36333902	36441228	14.7596	48.8195	3.81293	5.49324	20.1908	19.0655	8.60588	11.1763	19.3168	68.0073	57.1299	50.824	4.14675	4.48961	2.9944	3.62096	5.41069	5.33618	5.47234	5.75376
ASRNV20027603	0.00227268	0.0422343	3.19089	down	noncoding	long noncoding	XR_592378	LOC103692276	RefSeq model	629	chr5	-	11372126	11392448	TTCAGTCATGAATCAAGGGGACTCCAGATCTTACTAACAGAACCATTACAAACGCATTTT	103692276	intergenic							5.65926	20.1801	2.54001	4.21397	6.01932	5	5	6.61773	10.4565	30.7816	13.0029	26.4795	2.55455	2.36227	2.33678	2.90644	4.52748	4.17343	3.38464	4.77032
ASRNV20027150	0.00206879	0.0399516	3.17752	down	noncoding	long noncoding	XR_593090	LOC102556012	RefSeq model	888	chr6	+	108878476	108884966	GAGGAAAGAGCCTAACTAACAGTAAGAGAAGAACCAAAAGTCGTTCATTCGGCTACCCTT	102556012	intron sense-overlapping	NM_001004444	Zbtb1	zinc finger and BTB domain containing 1	+	108825980	108936519	54.8282	160.272	5.58066	7.24856	91.4309	35.8905	62.7314	29.26	70.1478	266.126	125.527	179.287	6.16831	5.44615	5.6388	5.06937	7.39787	7.33962	6.59928	7.65748
ASRNV20036113	3.89149e-07	0.000252742	3.16707	down	noncoding	long noncoding	XR_352749	LOC102549926	RefSeq model	1179	chr3	-	157021329	157029527	AAGGTGAGGTCTTGCTCACAATCATTGTCTGGACTCCAGCCTCTCTTCAAAGGTAGTCTG	102549926	intergenic							11.6556	39.0427	3.51342	5.17657	13.5914	10.3303	13.0745	9.62611	16.5676	57.5604	43.5942	38.4487	3.5847	3.5709	3.49806	3.40002	5.19637	5.09782	5.08301	5.32907
ASRNV20036113	8.00981e-07	0.000392717	3.16587	down	noncoding	long noncoding	XR_343770	LOC102556116	RefSeq model	2908	chr20	-	16126022	16129380	AACTTTCCTACTACACACGTGGCAGCCAGTTTTCTTCAAGGTCCAGACAAAGTGAAGTAG	102556116	intronic antisense	ENSRNOT00000001659	Cabin1		+	16025714	16151225	5	17.1871	2.34756	4.01017	5	5	5	5	8.40944	24.8719	19.1347	16.3323	2.33557	2.36227	2.33678	2.35563	4.22074	3.86727	3.9093	4.04335
ASRNV20032042	8.00981e-07	0.000392717	3.16587	down	noncoding	long noncoding	XR_343770	LOC102556116	RefSeq model	2908	chr20	-	16126022	16129380	AACTTTCCTACTACACACGTGGCAGCCAGTTTTCTTCAAGGTCCAGACAAAGTGAAGTAG	102556116	intronic antisense	NM_053575	Cabin1	calcineurin binding protein 1	+	16025716	16151225	5	17.1871	2.34756	4.01017	5	5	5	5	8.40944	24.8719	19.1347	16.3323	2.33557	2.36227	2.33678	2.35563	4.22074	3.86727	3.9093	4.04335
ASRNV20028884	3.40751e-05	0.00253749	3.16222	down	noncoding	long noncoding	XR_590054	LOC102555005	RefSeq model	236	chr12	+	15300365	15303581	ACCTTGAACATTCAGTCCAGAAGAAATTTCAAGGCTCTGCTAATCTGTCCCAATCTGAGG	102555005	intergenic							5	17.9756	2.34756	4.0085	5	5	5	5	6.16553	25.1133	19.0438	21.5796	2.33557	2.36227	2.33678	2.35563	3.79476	3.88075	3.90157	4.45692
ASRNV20037125	0.00258379	0.0456718	3.15826	down	noncoding	long noncoding	XR_589478	LOC100912870	RefSeq model	344	chr8	-	37716970	37719071	AGCCACCCCTTTCTGCAATATGGTACATCGCTGATACTTAATTGTATGGAAGGATTTTAG	100912870	exon sense-overlapping	ENSRNOT00000007903	AABR06054123.1		-	37716972	37719631	9.67557	38.1125	3.24941	4.90855	13.5492	10.2337	5.92209	8.99725	10.3021	80.5142	35.0566	26.5771	3.5806	3.55749	2.54907	3.3105	4.50495	5.58058	4.77252	4.77613
ASRNV20037125	1.14045e-05	0.00129723	3.14457	down	noncoding	long noncoding	XR_354873	LOC102548030	RefSeq model	416	chr6	+	101235118	101239996	TTTGTTCATGTTCAGTGAGAAGAAACTTTCCCAGAAGTCCCTGGCAAAGCATCCTAACCC	102548030	intergenic							5.23817	18.9024	2.45152	4.10438	5	5	5	5.95268	7.36434	27.0941	21.9768	19.1743	2.33557	2.36227	2.33678	2.77146	4.03609	3.99063	4.10728	4.28354
ASRNV20034466	0.00027151	0.00987898	3.13865	down	noncoding	pseudogene	ENSRNOT00000049304	AABR06064004.1	Ensembl	936	chr10	+	43995587	43996524	GAACAACTACACTGGACCATCAGATTTCACCCTGCTGGGATTCTTCAGTCAATCCAAACA		exon sense-overlapping	NM_001000011	Olr1428	olfactory receptor 1428	+	43995608	43996524	6.13519	22.7341	2.64686	4.29701	5	7.3348	7.20596	5	7.0536	37.0751	25.5996	21.2081	2.33557	3.12347	2.77277	2.35563	3.98119	4.4478	4.32509	4.43394
ASRNV20034389	0.0022677	0.0422343	3.10292	down	noncoding	long noncoding	XR_600243	LOC102553021	RefSeq model	897	chr3	-	72963672	72997517	AGGAAATAGCTTGTTCCTGACCATTTTCTCTCTGTCTCTTATTGTCCTGGCTTTCTAAAG	102553021	intron sense-overlapping	NM_019218	Neurod1	neuronal differentiation 1	-	72974882	72978179	51.0144	137.696	5.41983	7.05345	80.5654	19.9418	67.1355	36.4146	60.3866	199.253	160.008	131.135	5.99748	4.55271	5.72836	5.40075	7.16109	6.91205	6.95172	7.18895
ASRNV20031603	0.000324483	0.0112709	3.097	down	noncoding	long noncoding	XR_596967	Neto1	RefSeq model	845	chr18	+	82533618	82642391	ACGATCCAAGCTCCCTGTGAAGGCAACACATTCTTCTGCCACAGTAACATGTGTATTAAC	307206	exon sense-overlapping	NM_001107371	Neto1	neuropilin and tolloid like 1	+	82532692	82645708	6.42769	24.1225	2.73949	4.37036	5	6.14181	8.99982	5.56915	6.72225	35.8403	29.5134	24.4138	2.33557	2.88235	3.04857	2.69146	3.91314	4.39751	4.52596	4.64483
ASRNV20033198	0.000126169	0.00585638	3.07277	down	noncoding	long noncoding	XR_594813	LOC102549419	RefSeq model	1212	chr10	-	63939205	63950593	TTTAGAATACACAGAAGACACTGATGCTCTATTAGCATAGGACCTCCATCCCCATGCTGC	102549419	intronic antisense	ENSRNOT00000008697	Rph3al		+	63905251	64016749	7.6299	27.7836	2.9847	4.60424	7.45955	9.08274	6.89199	7.08532	8.86532	42.9052	32.5102	26.8535	2.82057	3.40131	2.72204	2.99488	4.28625	4.67296	4.66597	4.79178
ASRNV20027210	0.000126169	0.00585638	3.07277	down	noncoding	long noncoding	XR_594813	LOC102549419	RefSeq model	1212	chr10	-	63939205	63950593	TTTAGAATACACAGAAGACACTGATGCTCTATTAGCATAGGACCTCCATCCCCATGCTGC	102549419	intronic antisense	NM_133591	Rph3al	rabphilin 3A-like (without C2 domains)	+	63905251	64017359	7.6299	27.7836	2.9847	4.60424	7.45955	9.08274	6.89199	7.08532	8.86532	42.9052	32.5102	26.8535	2.82057	3.40131	2.72204	2.99488	4.28625	4.67296	4.66597	4.79178
ASRNV20035234	1.20446e-08	4.1558e-05	3.07014	down	noncoding	long noncoding	XR_359494	LOC102554165	RefSeq model	922	chr14	+	35675421	35683061	AAGTATGCAGGCAGTCATGTGATGGGTCAGGTTGTTAGATATAGTCTGTTAGGTGTGTGC	102554165	intergenic							5.00301	17.557	2.36591	3.98422	5.01205	5	5	5	6.70828	27.2011	19.6756	16.6428	2.40898	2.36227	2.33678	2.35563	3.90969	3.99572	3.95552	4.07593
ASRNV20027216	0.000330655	0.0113332	3.06068	down	noncoding	long noncoding	XR_593534	LOC102553568	RefSeq model	2892	chr7	-	98229555	98238077	TTAAGGAATTCAGATCTCTCTTTCCTGCCCACAGAATGAATGACCTGTCCTGGAGAAGAG	102553568	intronic antisense	NM_001271056	Zhx2	zinc fingers and homeoboxes 2	+	98166914	98302597	20.4025	64.5614	4.31523	5.92908	16.2624	24.0264	24.8485	16.4725	28.9688	92.9866	73.7903	62.4998	3.83459	4.83949	4.3934	4.19344	6.0312	5.7931	5.83164	6.06038
ASRNV20030775	0.000183786	0.00743112	3.0554	down	noncoding	long noncoding	XR_591852	Spint4	RefSeq model	1156	chr3	+	167338187	167342771	TTAAAAGTGAGAGCATCTCCCTGTGAGTCCTTCTTCTCTGTCTGTGTCTTTATCCTGCTG	100361889	exon sense-overlapping	ENSRNOT00000019849	Spint4	serine peptidase inhibitor, Kunitz type 4	+	167338187	167341131	69.4786	233.274	6.06891	7.68027	86.9791	58.955	62.9975	68.9829	66.1644	389.425	280.708	196.798	6.09852	6.19411	5.64415	6.33888	7.30388	7.88594	7.74399	7.78728
ASRNV20027204	9.44325e-05	0.00498126	3.04406	down	noncoding	pseudogene	ENSRNOT00000072289	AABR06011621.1	Ensembl	288	chr2	+	11747904	11748199	ATTTTCATTATTTAAGGAAAGCAAGTGCCAAGACCATCCCAGGACTGCATGCCCTCCTCA		intergenic							7.5349	25.9368	2.94266	4.54866	6.1519	5.77319	9.04513	9.16938	9.65459	37.8719	30.6613	25.5595	2.58117	2.801	3.05462	3.33383	4.41309	4.48403	4.58245	4.71505
ASRNV20035733	0.0003042	0.0108205	3.03849	down	noncoding	long noncoding	XR_592870	LOC102551210	RefSeq model	2265	chr6	+	9116927	9145777	AGTCACATGGCTGACCACTGAAGACCCAGGATGTGCCGGTTCAGCCTTGCCTACCCGCTG	102551210	intergenic							6.66883	21.9326	2.71677	4.32012	8.65572	5	5	8.01962	9.15137	34.0918	24.347	20.14	3.00694	2.36227	2.33678	3.16108	4.34044	4.32417	4.2566	4.35927
ASRNV20030440	0.00230516	0.0425325	3.03454	down	noncoding	long noncoding	XR_592950	LOC102555892	RefSeq model	622	chr6	-	42146113	42249960	ACTTTTTGGGGCTGGAGAGATTAAGACACCCTGAAGTGGAATTTCTCCATAAGACAGTGT	102555892	intergenic							5.8406	19.1935	2.65002	4.2515	6.15978	6.56618	5	5.63642	15.1352	24.8678	18.0088	18.7624	2.58301	2.97642	2.33678	2.7039	5.06185	3.86693	3.82222	4.255
ASRNV20033995	0.000135911	0.00603784	3.03178	down	noncoding	long noncoding	XR_589077	Xrn1	RefSeq model	1996	chr8	+	103224903	103257885	GTCCTGATCACAATTTGTGGGTGCCTTTGCCAGTGAGGTGTTTCTTGGAGAAAACAAACA	300944	exon sense-overlapping	ENSRNOT00000014481	LOC100911537	5'-3' exoribonuclease 1-like	+	103225040	103329228	18.6247	59.4008	4.18117	5.78133	25.2492	18.7631	15.075	15.4115	24.6476	90.0876	66.7275	56.1404	4.45542	4.46829	3.7066	4.09437	5.78791	5.74339	5.68966	5.90437
ASRNV20032747	0.000135911	0.00603784	3.03178	down	noncoding	long noncoding	XR_589077	Xrn1	RefSeq model	1996	chr8	+	103224903	103257885	GTCCTGATCACAATTTGTGGGTGCCTTTGCCAGTGAGGTGTTTCTTGGAGAAAACAAACA	300944	exon sense-overlapping	ENSRNOT00000074705	LOC100911537	5'-3' exoribonuclease 1-like	+	103225040	103329048	18.6247	59.4008	4.18117	5.78133	25.2492	18.7631	15.075	15.4115	24.6476	90.0876	66.7275	56.1404	4.45542	4.46829	3.7066	4.09437	5.78791	5.74339	5.68966	5.90437
ASRNV20030597	0.000135911	0.00603784	3.03178	down	noncoding	long noncoding	XR_589077	Xrn1	RefSeq model	1996	chr8	+	103224903	103257885	GTCCTGATCACAATTTGTGGGTGCCTTTGCCAGTGAGGTGTTTCTTGGAGAAAACAAACA	300944	exon sense-overlapping	NM_001305240	Xrn1	5'-3' exoribonuclease 1	+	103224903	103329454	18.6247	59.4008	4.18117	5.78133	25.2492	18.7631	15.075	15.4115	24.6476	90.0876	66.7275	56.1404	4.45542	4.46829	3.7066	4.09437	5.78791	5.74339	5.68966	5.90437
ASRNV20031451	3.5458e-07	0.000252742	3.02811	down	noncoding	long noncoding	XR_593011	LOC103692629	RefSeq model	206	chr6	-	80527223	80527760	TGGATGGAAGCTGCTGCATCTTGGAGTCTAGCTTTCAACCAGCCTTCTACTTTGTATACA	103692629	intergenic							5	16.6162	2.34756	3.94598	5	5	5	5	7.27738	24.0755	18.2656	16.8465	2.33557	2.36227	2.33678	2.35563	4.02166	3.82241	3.84521	4.09462
ASRNV20028228	7.80676e-06	0.00104558	3.02556	down	noncoding	long noncoding	XR_589133	LOC102556057	RefSeq model	2231	chr8	+	122869424	122890355	ATCAACGCTGCTGACTTCCTGGAAAATAGAGGACAAACTCCAGGCAAACTATGATTCTGC	102556057	intergenic							5	16.7007	2.34756	3.94477	5	5	5	5	6.82892	23.047	18.0334	18.8935	2.33557	2.36227	2.33678	2.35563	3.93458	3.75514	3.82503	4.26432
uc.133-_P1	5.47927e-05	0.00347951	3.02431	down	noncoding	long noncoding	XR_349209	LOC102554475	RefSeq model	570	chr9	+	96156312	96174194	GTGGAAAATAGAACTAGGCCCTCATTGGAGGTTATTGATCACAGAGCATACCCTGGAAAG	102554475	intergenic							5	18.2051	2.34756	3.94417	5	5	5	5	5.04731	29.6112	20.3334	17.8284	2.33557	2.36227	2.33678	2.35563	3.48397	4.11742	3.99684	4.17845
ASRNV20034784	1.9158e-05	0.0018193	3.01593	down	noncoding	long noncoding	XR_600675	LOC103692123	RefSeq model	770	chr4	+	146390211	146393297	ATGCGTGTTCGATGTGAGACTGGGGCATCCCTTGGTGTGTCCAGCTGGCTGTTTCTGAAG	103692123	intergenic							8.8853	28.9143	3.14491	4.73752	12.4221	6.89459	8.71157	7.5129	11.9722	40.1944	33.4867	30.0039	3.45714	3.04478	3.00879	3.06893	4.71698	4.57249	4.70688	4.95372
ASRNV20030741	0.00181171	0.0364136	2.98643	down	noncoding	long noncoding	XR_590605	LOC102554891	RefSeq model	1402	chr1	-	241456048	241458886	TACTTGTGTTTACACTTTCAACATGCACATTCCATAGGTTTGGCCTTTTCTGTCCCTCCT	102554891	intronic antisense	NM_001270958	Rorb	RAR-related orphan receptor B	+	241354339	241535913	8.11591	28.7079	3.00786	4.58628	12.2988	7.03933	5	8.12554	7.42832	45.7419	35.9192	25.742	3.44301	3.07146	2.33678	3.18018	4.05029	4.76494	4.80782	4.72207
ASRNV20027898	3.4464e-05	0.00254812	2.98505	down	noncoding	long noncoding	XR_598752	LOC103695013	RefSeq model	1223	chr1	+	78482986	78624786	ACTGGTTTCAATCCTGCCAGGTCTTGCCCCTCATTTTGTTTTATTTTACCTATCATGTGT	103695013	intergenic							17.9705	58.5694	4.15684	5.73459	20.2912	18.9025	16.6434	16.0449	22.3751	83.4746	77.0795	51.3483	4.15402	4.47812	3.84044	4.15477	5.6388	5.63446	5.89357	5.77154
ASRNV20031136	7.19302e-06	0.0010092	2.96097	down	noncoding	long noncoding	uc.325-	uc.325	UCR	235	chr3	+	102445073	102445308	CCCCTTCCTGGCAGCTTTATTCTTAATTCCTGTTCAAGGAGTAATCTGTTTATTATAAAA		intronic antisense	ENSRNOT00000006385	AABR06025251.1		-	102353884	102575106	17.9263	54.5402	4.13164	5.69771	17.909	15.24	22.4737	16.0826	25.6967	75.7776	62.1675	54.519	3.97594	4.1456	4.24676	4.15826	5.84913	5.49023	5.58947	5.86202
ASRNV20007186	7.19302e-06	0.0010092	2.96097	down	noncoding	long noncoding	uc.325-	uc.325	UCR	235	chr3	+	102445073	102445308	CCCCTTCCTGGCAGCTTTATTCTTAATTCCTGTTCAAGGAGTAATCTGTTTATTATAAAA		intronic antisense	NM_001115047	Elp4	elongator acetyltransferase complex subunit 4	-	102353651	102575110	17.9263	54.5402	4.13164	5.69771	17.909	15.24	22.4737	16.0826	25.6967	75.7776	62.1675	54.519	3.97594	4.1456	4.24676	4.15826	5.84913	5.49023	5.58947	5.86202
ASRNV20035271	0.00281441	0.0479144	2.95168	down	noncoding	long noncoding	XR_596920	LOC103694173	RefSeq model	238	chr18	-	15282633	15287922	TCGGAAACAATGTTTTATCTTCCCAAGTCCTTCCTCACTGCCTCGTAAGTACACTATGAA	103694173	intronic antisense	ENSRNOT00000021764	B4galt6		+	15258329	15300179	66.0787	181.391	5.98916	7.5507	55.4705	49.5775	76.1223	83.1447	113.102	243.798	187.473	181.193	5.51887	5.93732	5.89357	6.60688	8.14198	7.21241	7.17251	7.67589
ASRNV20037237	0.00281441	0.0479144	2.95168	down	noncoding	long noncoding	XR_596920	LOC103694173	RefSeq model	238	chr18	-	15282633	15287922	TCGGAAACAATGTTTTATCTTCCCAAGTCCTTCCTCACTGCCTCGTAAGTACACTATGAA	103694173	intronic antisense	NM_001101000	Mapre2	microtubule-associated protein, RP/EB family, member 2	+	14599143	15549590	66.0787	181.391	5.98916	7.5507	55.4705	49.5775	76.1223	83.1447	113.102	243.798	187.473	181.193	5.51887	5.93732	5.89357	6.60688	8.14198	7.21241	7.17251	7.67589
ASRNV20027526	0.00281441	0.0479144	2.95168	down	noncoding	long noncoding	XR_596920	LOC103694173	RefSeq model	238	chr18	-	15282633	15287922	TCGGAAACAATGTTTTATCTTCCCAAGTCCTTCCTCACTGCCTCGTAAGTACACTATGAA	103694173	intronic antisense	NM_031740	B4galt6	beta-1,4-galactosyltransferase 6	+	15241488	15300184	66.0787	181.391	5.98916	7.5507	55.4705	49.5775	76.1223	83.1447	113.102	243.798	187.473	181.193	5.51887	5.93732	5.89357	6.60688	8.14198	7.21241	7.17251	7.67589
ASRNV20033570	0.000162229	0.00682616	2.94443	down	noncoding	long noncoding	XR_596722	LOC102550795	RefSeq model	1673	chr17	+	32717411	32747116	TTTTAGTGACTCAACAGAGAAGGGATGTAATGAGGATGATGCCAAGCACACCCCTCATTC	102550795	intergenic							5	17.8252	2.34756	3.90555	5	5	5	5	5.20557	32.2805	15.6217	18.193	2.33557	2.36227	2.33678	2.35563	3.53386	4.24676	3.63445	4.20712
ASRNV20031666	0.000673428	0.0189936	2.93692	down	noncoding	long noncoding	XR_592643	LOC103692418	RefSeq model	2763	chr5	-	118756281	118775126	TCGTGATCATCGCTGATAGACATGTGGACACTTGCTCACCCTTTGGTCTTTATCTAACAG	103692418	intronic antisense	NM_001013932	Fggy	FGGY carbohydrate kinase domain containing	+	118461634	118848791	5.94036	19.5831	2.61307	4.16737	5.37299	8.38846	5	5	7.90649	27.222	23.2069	19.9969	2.45877	3.30108	2.33678	2.35563	4.13894	3.99676	4.18475	4.34903
ASRNV20004699	0.00014174	0.00619372	2.93171	down	noncoding	long noncoding	XR_591210	LOC103691628	RefSeq model	2145	chr2	+	211889899	211892999	TTCCCCTGTCTTAGTACCTGCTGTATTTATTCTTGACAAATAAATGCTGAGTTCATCAGT	103691628	exon sense-overlapping	ENSRNOT00000045938	AABR06019050.2		+	211891811	211892213	6.55954	22.2632	2.72429	4.27604	7.28764	6.10423	7.84627	5	6.69393	32.9367	26.9894	22.433	2.79023	2.87556	2.87576	2.35563	3.90657	4.27862	4.40171	4.51725
ASRNV20036631	0.00180678	0.0363852	2.91332	down	noncoding	long noncoding	XR_356850	LOC102554116	RefSeq model	717	chr9	-	13966787	13971962	TTAGTTCTTACTGTCACCACAGCCCTACACATTAGCATAAATTAAAAGCAGGGTTTATTG	102554116	intergenic							9.2644	30.7527	3.17511	4.71777	12.9276	11.4739	6.70177	5.95434	9.31161	49.0811	38.8797	25.7386	3.5141	3.72956	2.68456	2.77221	4.36527	4.86704	4.91708	4.72169
ASRNV20027669	0.00104395	0.0256672	2.91291	down	noncoding	long noncoding	XR_347019	LOC102554703	RefSeq model	322	chr6	-	2359362	2382869	TCCACAATGAGTTTCTTGTGGTTTGTATGTGTTGGGGTGCTGTTAGGATACAGATTTTTT	102554703	intergenic							9.90701	30.8014	3.24743	4.78989	14.8319	10.4558	8.91793	5.42249	11.3039	48.5312	32.128	31.2424	3.7066	3.5894	3.03604	2.65768	4.63984	4.85279	4.65064	5.01629
ASRNV20033322	0.00020969	0.00810286	2.90412	down	noncoding	long noncoding	XR_594848	LOC103693413	RefSeq model	2569	chr10	+	74322482	74325051	TGAGCCCTTGCTTCTTTGCTCAGAGTACAGTGTCTGGTTTAATGGGAAAATGTCACCTGA	103693413	intron sense-overlapping	ENSRNOT00000003164	Msi2	musashi RNA-binding protein 2	+	74071856	74427908	18.9214	58.7566	4.21662	5.75472	22.8571	21.4311	16.2955	15.1017	22.8241	85.2057	69.3755	57.6212	4.32494	4.66432	3.81178	4.06543	5.66998	5.66381	5.74602	5.93907
ASRNV20036829	0.000704618	0.0195565	2.9036	down	noncoding	long noncoding	XR_591907	LOC102550673	RefSeq model	2571	chr3	+	177303301	177312856	GAGATAGAGAAGGCTGGCCACCAGGGTCAGGAGGGATGGTTCCTGTTGCCTGAGTACAGG	102550673	intergenic							12.9307	38.6944	3.66527	5.20311	16.5612	11.5736	8.95447	14.6334	19.5095	55.055	40.9153	39.2979	3.8577	3.74453	3.04301	4.01582	5.42619	5.03686	4.99089	5.35851
uc.161+_P1	0.00040351	0.0130116	2.89539	down	noncoding	long noncoding	XR_590048	LOC103691023	RefSeq model	174	chr12	-	12879883	12881651	ATATCCTCTTCAACGTGACCCACAGCACTGGACGGAGCCTGAGGAATTTCATCCAGAAAG	103691023	exon sense-overlapping	ENSRNOT00000071669	Cyp3a85-ps	cytochrome P450, family 3, subfamily a, polypeptide 85, pseudogene	-	12819937	12894034	8.40167	27.0914	3.0768	4.61056	12.0613	8.35819	5.37335	7.8138	10.269	41.3243	30.6239	26.1486	3.41666	3.29671	2.46972	3.12412	4.50072	4.61593	4.57992	4.74566
ASRNV20033256	0.00040351	0.0130116	2.89539	down	noncoding	long noncoding	XR_590048	LOC103691023	RefSeq model	174	chr12	-	12879883	12881651	ATATCCTCTTCAACGTGACCCACAGCACTGGACGGAGCCTGAGGAATTTCATCCAGAAAG	103691023	exon sense-overlapping	NM_153312	Cyp3a2	cytochrome P450, family 3, subfamily a, polypeptide 2	-	12819937	13740743	8.40167	27.0914	3.0768	4.61056	12.0613	8.35819	5.37335	7.8138	10.269	41.3243	30.6239	26.1486	3.41666	3.29671	2.46972	3.12412	4.50072	4.61593	4.57992	4.74566
ASRNV20033256	0.000104613	0.0053081	2.88478	down	noncoding	long noncoding	XR_594273	LOC685976	RefSeq model	1104	chr2	-	175777330	176138291	TGGTGGCTAGCTCACTGCTCTCCTCCTTTACCTCGTTTTCTCCTTGGCCATCCTGGTCCA	685976	intron sense-overlapping	NM_001127530	LOC302022	similar to nidogen 2 protein	-	176099246	176179301	81.7352	247.068	6.31137	7.83984	82.7361	82.5592	88.2611	73.3845	84.013	367.431	312.059	224.768	6.03046	6.70432	6.09015	6.42057	7.68052	7.79732	7.89835	7.98316
ASRNV20033256	6.43347e-05	0.00391723	2.88056	down	noncoding	long noncoding	XR_594133	LOC102557304	RefSeq model	2533	chr14	+	88707219	88710486	TTGCTGGGTAGCCTGTGCTGTTCTCACCCTCTCACCAACACAAAAAACATGTTGGTTTTA	102557304	intergenic							42.5695	128.85	5.37778	6.90413	55.2275	39.6241	37.0874	38.3391	50.5674	204.091	147.158	113.583	5.51262	5.59527	4.92814	5.47509	6.88062	6.94602	6.82261	6.96726
ASRNV20029689	0.000186545	0.0074842	2.87722	down	noncoding	long noncoding	XR_597019	LOC102549109	RefSeq model	2029	chr18	-	54597296	54626574	AGCGGTACAGGTGCCTCACTACTCACTGACATGGTGCAGTGCCTACTCTTCCCCTATTCT	102549109	intergenic							25.5235	78.6237	4.6592	6.18387	30.1517	25.4445	20.5578	25.94	31.4117	114.466	99.858	68.7592	4.69145	4.93019	4.12876	4.8864	6.15811	6.10331	6.27008	6.20399
ASRNV20030584	5.24765e-05	0.00337382	2.86727	down	noncoding	long noncoding	XR_595478	LOC102553951	RefSeq model	1066	chr13	+	57413725	57417238	ATCTCCCAGAAGCTAGACTCTAGGGCTAACCTGCTTCCTCAAAGGTGACCAACGGAGCAG	102553951	natural antisense	ENSRNOT00000011801	LOC685707		-	57316373	57463205	9.87104	30.3642	3.31769	4.83736	10.23	10.6967	9.48687	9.07066	14.5636	44.7746	30.9605	31.1581	3.21421	3.62071	3.11575	3.32008	5.00164	4.73613	4.59948	5.01221
ASRNV20033584	5.24765e-05	0.00337382	2.86727	down	noncoding	long noncoding	XR_595478	LOC102553951	RefSeq model	1066	chr13	+	57413725	57417238	ATCTCCCAGAAGCTAGACTCTAGGGCTAACCTGCTTCCTCAAAGGTGACCAACGGAGCAG	102553951	natural antisense	ENSRNOT00000037100	LOC685707		-	57316373	57463205	9.87104	30.3642	3.31769	4.83736	10.23	10.6967	9.48687	9.07066	14.5636	44.7746	30.9605	31.1581	3.21421	3.62071	3.11575	3.32008	5.00164	4.73613	4.59948	5.01221
ASRNV20033571	0.00268743	0.0467355	2.85592	down	noncoding	long noncoding	XR_598474	LOC100912606	RefSeq model	643	chr19	-	36100863	36104239	AAGTCTTCCTCCAGTGGGCCTAGAATTTTTCTGCTACCAGAAACTTGTTTTCTGGGTTCC	100912606	natural antisense	ENSRNOT00000007407	LOC686013	hypothetical protein LOC686013	+	36100965	36103834	18.0688	50.4433	3.997	5.51096	12.1627	10.7574	33.4741	15.8811	19.2397	77.9356	57.7382	46.8598	3.42731	3.62733	4.79464	4.13872	5.40479	5.53043	5.48872	5.6199
ASRNV20030637	9.26939e-05	0.00495571	2.84998	down	noncoding	long noncoding	XR_593408	LOC103692839	RefSeq model	2285	chr14	+	42456784	42461477	TCCTGCTGTGTTTGCCAAGGATGAGTTGGGGTACAGTATTGAGGTGGGTATAGGAAGGGA	103692839	intergenic							7.06381	21.7275	2.79653	4.30748	8.90437	5	7.07614	7.27472	8.82826	31.9171	25.2925	20.8724	3.04312	2.36227	2.75126	3.02947	4.28085	4.22868	4.30955	4.41085
ASRNV20030637	0.000251577	0.00923429	2.84644	down	noncoding	long noncoding	XR_595407	LOC103693653	RefSeq model	622	chr15	+	47152682	47154908	GCCATTTGATCCTCCTCCTTGCCCATCTGGAGATAAAGAATGAGATTCTCAAACATGAAG	103693653	exon sense-overlapping	ENSRNOT00000017939	AABR06083661.1		+	47154239	47154916	42.2468	126.166	5.38997	6.89913	42.1723	45.1129	40.1127	41.5893	49.796	172.925	160.504	121.44	5.14396	5.78875	5.03246	5.59471	6.86045	6.70727	6.9555	7.07331
ASRNV20029387	0.000251577	0.00923429	2.84644	down	noncoding	long noncoding	XR_595407	LOC103693653	RefSeq model	622	chr15	+	47152682	47154908	GCCATTTGATCCTCCTCCTTGCCCATCTGGAGATAAAGAATGAGATTCTCAAACATGAAG	103693653	natural antisense	NM_012767	Gnrh1	gonadotropin releasing hormone 1	-	47151130	47155339	42.2468	126.166	5.38997	6.89913	42.1723	45.1129	40.1127	41.5893	49.796	172.925	160.504	121.44	5.14396	5.78875	5.03246	5.59471	6.86045	6.70727	6.9555	7.07331
ASRNV20033010	0.000132991	0.00598516	2.84492	down	noncoding	long noncoding	XR_361620	LOC102553339	RefSeq model	1882	chr19	+	11046749	11050276	CCAGCTCCAGTCCAGTGATAGAGCACGTGCTTAGCGTCTGTGGTGCCAGAACCTCAAACA	102553339	intergenic							10.4294	32.0115	3.38672	4.89511	10.7083	11.8953	10.5451	8.56876	15.8819	52.864	30.783	28.5172	3.2697	3.78297	3.24721	3.24702	5.13243	4.97978	4.59046	4.87777
ASRNV20034128	0.000365214	0.0121554	2.82584	down	noncoding	long noncoding	uc.228+	uc.228	UCR	265	chr4	+	44138863	44139128	TATCTGAGGAGTCTAGAGACAGTGATTTTACCATTTATTTCCCCTTTCTGCGCTTGACCC		intergenic							8.66384	29.1977	3.15155	4.65023	8.73255	8.14057	7.91798	9.86425	8.14409	41.9008	37.3332	29.4129	3.02048	3.26013	2.88896	3.43662	4.17901	4.63652	4.86174	4.92365
ASRNV20029937	0.000107912	0.00533045	2.82249	down	noncoding	pseudogene	ENSRNOT00000076599	Rn50_1_1353.1	Ensembl	330	chr1	+	135230202	135230532	GCTGCTCTTCACCATGGACGGTATTAGTCATCACTGGTCACAAAGATTTGCAAAACGTCA		intergenic							9.13314	28.3361	3.21693	4.71389	7.64404	9.90236	8.98365	10.0025	12.3112	41.353	32.1813	27.4991	2.8516	3.5139	3.04758	3.45463	4.75656	4.61738	4.65281	4.82882
uc.10-_P1	3.60389e-05	0.00260212	2.79104	down	noncoding	long noncoding	XR_593167	LOC102548124	RefSeq model	1531	chr6	+	135541257	135552916	CAAAGTCTAAGTACGGTCTCTGCTTCAGCTTTCAAGCACTACGGTTCCAGACGTATATAA	102548124	intergenic							5.17634	17.0686	2.39286	3.87366	5	5	5.70535	5	5.14128	25.4271	22.271	15.4349	2.33557	2.36227	2.51798	2.35563	3.51318	3.89868	4.12753	3.95527
ASRNV20032947	0.00227184	0.0422343	2.7804	down	noncoding	long noncoding	XR_347392	Lin52	RefSeq model	1726	chr6	-	117281817	117379150	TAGGTGATTGGTCAAAGGCGGAAGCGTTTTCCTCTTCTCTGACTTCAGCCTATTTTTGTT	362763	exon sense-overlapping	ENSRNOT00000064426	Lin52	lin-52 DREAM MuvB core complex component	-	117298278	117378681	8.12757	25.4018	2.96041	4.43571	7.72283	5	9.26627	10.5212	7.0717	37.3621	34.01	23.1637	2.86531	2.36227	3.08409	3.52998	3.985	4.46224	4.72798	4.56761
ASRNV20032944	0.00240114	0.0435275	2.77433	down	noncoding	long noncoding	XR_597127	LOC103694284	RefSeq model	524	chr19	-	10298385	10303829	AAAGACAAAAAGAAGGGAAATCCAACCCAACCTCCACTGGCCAAAGTCTTATCACTGGGT	103694284	intronic antisense	NM_001103352	Kifc3	kinesin family member C3	+	10300708	10319286	8.87182	29.0932	3.16493	4.63707	9.92834	9.25361	5.76532	10.54	7.76127	41.5635	36.9502	30.098	3.1764	3.4252	2.52516	3.53295	4.11665	4.62498	4.84808	4.95856
ASRNV20028028	9.84483e-05	0.00509579	2.7516	down	noncoding	long noncoding	uc.289-	uc.289	UCR	254	chr15	+	1555943	1556197	CCTTTGTCTGTCTATCACTGGATTGCCTCTAGCTGTAATTTTATAAAGAAGCTGTAAAAT		intronic antisense	NM_001109441	LOC681383	similar to Protein C10orf11 homolog	-	1254879	2328752	8.10526	26.9495	3.06365	4.52392	8.8667	7.45592	8.26155	7.83688	7.64223	39.8819	36.2099	24.0639	3.03745	3.14315	2.94648	3.12751	4.09302	4.56196	4.81881	4.62189
ASRNV20027097	0.000106908	0.00533045	2.74646	down	noncoding	long noncoding	XR_590980	LOC102546437	RefSeq model	865	chr2	+	113756334	113768307	ATTTTGGAAACATGAGTTTCTCCCCAGTTTCTTTTCCCACAGCTCCTGACAACTGGCACA	102546437	intergenic							43.1734	131.389	5.40721	6.86478	44.8778	43.802	48.7071	35.3066	39.8222	211.158	157.31	117.267	5.23587	5.74112	5.2927	5.35915	6.52271	6.99237	6.92785	7.01619
ASRNV20031825	2.2511e-06	0.000597465	2.74168	down	noncoding	long noncoding	XR_357106	LOC102554970	RefSeq model	1175	chr9	+	79127561	79142632	CACTTCTCTTCCACAAGAGGAATTGTTCCTTGTTCTAAGATGGAGGACCTTGCCATATAG	102554970	intergenic							5.20516	15.93	2.39645	3.85151	5	5	5.82064	5	6.52473	25.8475	15.8087	15.539	2.33557	2.36227	2.53234	2.35563	3.87186	3.91883	3.65054	3.96482
ASRNV20035384	9.51141e-06	0.00118458	2.73387	down	noncoding	long noncoding	XR_592115	LOC103692123	RefSeq model	901	chr4	+	146383171	146393297	AGAGAAACTCGATATCCTTGGGTGGCCTTGGATTCTTCTGATTTGTTTCTTTGGTGGCAC	103692123	intergenic							14.9419	43.9799	3.85838	5.30932	17.216	12.6106	18.4971	11.4438	15.8858	63.5428	53.338	43.153	3.91961	3.86939	3.98726	3.65726	5.13306	5.23825	5.37168	5.49429
ASRNV20036491	0.00271641	0.0469409	2.71467	down	noncoding	long noncoding	XR_360982	LOC102555591	RefSeq model	2679	chr17	-	35839130	35846971	CAACACATCTGTGCCTACTACATAAATCAGTGTCCTCCTTATCTACTAAGGGAAAGGTGC	102555591	intergenic							12.7357	36.6622	3.58643	5.02721	11.1388	6.59128	15.4911	17.7215	12.9697	57.0192	41.9469	34.7132	3.31953	2.98047	3.74365	4.30208	4.82882	5.0829	5.02645	5.17066
ASRNV20032668	0.00231228	0.0425878	2.7141	down	noncoding	long noncoding	XR_592521	LOC103692355	RefSeq model	886	chr13	-	104356157	104362774	TCAGTGAGCCACACTGCCAGACCCTACACTGTGATTTTTCAATGATGAAAATTATTATCT	103692355	intergenic							7.37012	21.4411	2.82219	4.26266	11.4447	8.03581	5	5	8.53673	35.9049	21.4686	19.854	3.35517	3.24118	2.33678	2.35563	4.23704	4.39956	4.07615	4.3379
ASRNV20035655	0.000125683	0.00585638	2.68336	down	noncoding	long noncoding	XR_597398	LOC102552513	RefSeq model	312	chr20	-	26009520	26018772	ATCAAGAACACACTGACAAAACCCACAAAAGCCAGGCTTCTCCAGAGCACATAGAATCGA	102552513	intergenic							7.93377	25.3652	3.03318	4.45722	7.99883	8.89514	8.13639	6.70471	7.73996	38.7954	32.0059	22.9195	2.90847	3.37272	2.92425	2.92727	4.11348	4.52078	4.64522	4.5494
ASRNV20035486	0.00208037	0.0400089	2.67106	down	noncoding	long noncoding	XR_601299	LOC102555011	RefSeq model	814	chr6	-	6690320	6693447	TAATAGCAGGGCTGACAGCGTGAGCGGCTCAATGTCCTTCCCCTTTGTCCTGTGATGTCT	102555011	intergenic							40.2148	108.342	5.2678	6.68521	56.8792	36.6261	26.466	40.8878	44.908	152.084	130.684	105.693	5.55072	5.47795	4.47488	5.56765	6.70007	6.52087	6.65565	6.86425
ASRNV20028702	0.0023655	0.0430322	2.66292	down	noncoding	long noncoding	XR_346577	LOC102552278	RefSeq model	746	chr5	-	105235698	105237614	TTCTTCTCCTTGAGTTAACAAGAGGCTGACAATCAGGATTTCCCTGTCTCCGAACCATCA	102552278	intergenic							15.1373	42.7506	3.85639	5.26939	22.0772	17.1276	9.9595	11.385	16.6821	69.7912	44.8612	39.6681	4.27594	4.32364	3.17711	3.64885	5.20866	5.37049	5.12463	5.37379
ASRNV20031617	0.000579249	0.0169853	2.66283	down	noncoding	pseudogene	XR_594287	LOC100363335	RefSeq model	1692	chr14	+	100027593	100029284	GGGCGCTCCAGGCGACAGCGCTGCAGACGCCATTATCCTCTGCTTCTCCGCTGCACAGAC	100363335	intergenic							26.3945	75.1972	4.65977	6.07274	39.0449	24.096	20.4475	21.9897	25.4139	118.429	88.7521	68.1939	5.04007	4.844	4.12146	4.63357	5.83408	6.16057	6.10317	6.19313
ASRNV20031617	7.32425e-05	0.00416557	2.65582	down	noncoding	long noncoding	XR_590984	LOC102556687	RefSeq model	1007	chr2	-	114102561	114126810	TTCATGGTTTCTTAACTCAGAGAAGCCTGCTTATGCCTGGCCAATTCCAAGATCTCGAAG	102556687	intergenic							5.2678	15.9701	2.458	3.86716	5	5	5	6.07121	6.16254	21.3406	19.8217	16.5556	2.33557	2.36227	2.33678	2.7974	3.79398	3.64348	3.96418	4.067
ASRNV20031617	0.000247571	0.00913489	2.65328	down	noncoding	long noncoding	uc.266+	uc.266	UCR	243	chr5	+	75534026	75534269	TTCTGCATGAAACATCTGCATCAAGGCTCTCTTTGATGTATTCCACTTGGCTCTGTCTAC		intergenic							8.33047	25.8977	3.09064	4.49841	10.1513	7.75593	7.34791	8.06671	7.66475	37.4011	31.0105	27.5146	3.20421	3.19371	2.79536	3.16927	4.09736	4.46579	4.60109	4.8294
ASRNV20032457	2.15597e-06	0.000587274	2.65235	down	noncoding	long noncoding	XR_596522	LOC103693993	RefSeq model	2454	chr16	+	73483740	73487468	GTTTTTAAAGAAGTTTTCTGGCGCCTTCTTCTTCTTGAAGCTCTTCTCGAGCTCCGCAGA	103693993	intergenic							5	14.6018	2.34756	3.75483	5	5	5	5	6.14249	20.8207	15.9103	15.5338	2.33557	2.36227	2.33678	2.35563	3.78935	3.60729	3.6584	3.9643
ASRNV20028762	0.000871439	0.022664	2.61577	down	noncoding	long noncoding	XR_349181	LOC102550479	RefSeq model	2504	chr9	+	91735017	91738265	TGATATGAGGGATGGACGTCAGCCTCAGTCTGTGAGCCAGAGCAAACCCTTTCTTCCAGC	102550479	intronic antisense	ENSRNOT00000022564	Dner	delta/notch-like EGF repeat containing	-	91700912	91800040	7.74667	20.9343	2.86349	4.25073	8.761	5	11.5478	5.67788	8.10785	30.1601	23.3864	22.0828	3.02347	2.36227	3.35389	2.71435	4.17261	4.14386	4.1966	4.48986
ASRNV20028223	1.08567e-05	0.00126267	2.60325	down	noncoding	long noncoding	XR_594757	LOC103693356	RefSeq model	355	chr10	-	56005543	56005977	CCAGGTGCTGCAGACCTTTCCCACCTGTACTCAGCCTCTAAAAAAGCGTTTAAAGTCTGA	103693356	bidirectional	NM_001108830	Sox15	SRY box 15	+	56006151	56009141	17.492	48.6511	4.08341	5.46372	17.5305	13.0839	23.0678	16.286	18.4617	71.589	58.6671	45.8868	3.9467	3.92377	4.28786	4.17529	5.35097	5.40456	5.51375	5.58561
ASRNV20035424	0.00127865	0.0294117	2.59752	down	noncoding	long noncoding	XR_590575	LOC102551693	RefSeq model	1580	chr1	-	229730910	229733130	TTCACCTCCCCTCAGAAAAGAACAGGCTTCCCAAGGACATCAATTCAAATGGCATAAGAC	102551693	bidirectional	ENSRNOT00000066596	Atl3		+	229733494	229775603	25.5162	67.2055	4.56598	5.94312	41.541	22.4675	21.1944	16.8618	26.8918	91.5055	94.8072	55.6175	5.12297	4.73812	4.17217	4.23067	5.91475	5.76977	6.19533	5.89261
ASRNV20031807	0.00127865	0.0294117	2.59752	down	noncoding	long noncoding	XR_590575	LOC102551693	RefSeq model	1580	chr1	-	229730910	229733130	TTCACCTCCCCTCAGAAAAGAACAGGCTTCCCAAGGACATCAATTCAAATGGCATAAGAC	102551693	bidirectional	NM_001044241	Atl3	atlastin GTPase 3	+	229733268	229774188	25.5162	67.2055	4.56598	5.94312	41.541	22.4675	21.1944	16.8618	26.8918	91.5055	94.8072	55.6175	5.12297	4.73812	4.17217	4.23067	5.91475	5.76977	6.19533	5.89261
ASRNV20028297	1.60856e-06	0.00052032	2.58698	down	noncoding	long noncoding	XR_597621	LOC100361265	RefSeq model	2138	chrX	-	72524611	72528298	CTGGGAATGCAGTGAAGGCGGTGACGGTTTTCCCTCAGACTGTTCCTGCAGGGCAGAAAC	100361265	exon sense-overlapping	ENSRNOT00000037212	LOC100361265	rCG64283-like	-	72524618	72528189	5.12443	15.4574	2.44034	3.8116	5.22897	5	5	5.26874	6.13751	23.4646	17.1929	15.0345	2.43906	2.36227	2.33678	2.62324	3.78718	3.78511	3.75626	3.91787
ASRNV20031443	3.90674e-07	0.000252742	2.58687	down	noncoding	long noncoding	XR_589904	LOC102553527	RefSeq model	1162	chr1	-	35126268	35134547	GTTTGCTCTAGAGAGTTTCCTGTGGAGACCATAGTGGGAAGTTACCTGCTTCCTAGGTGA	102553527	intergenic							5	14.4761	2.34756	3.71877	5	5	5	5	5.69402	21.0458	16.3999	14.7647	2.33557	2.36227	2.33678	2.35563	3.66896	3.622	3.6978	3.88631
ASRNV20033498	3.77897e-06	0.000711202	2.58626	down	noncoding	long noncoding	XR_600723	LOC103692162	RefSeq model	1312	chr4	+	168777805	168791351	GCCCAACAAACACAAAATGCAAGTGCTCGCTCTCCACTGCTCATCTGCTGTGATTCCCAG	103692162	intergenic							27.6595	76.3894	4.77728	6.14815	29.8707	25.5644	29.5698	25.6333	30.6656	114.692	88.415	71.7854	4.6792	4.93722	4.62179	4.87089	6.11933	6.10652	6.0972	6.26954
ASRNV20028483	4.08986e-05	0.00282228	2.58306	down	noncoding	long noncoding	XR_591825	LOC102547303	RefSeq model	594	chr3	-	164905846	164908890	TATTCTGCCTCATTATGTTCCGAGCCTATGTGAGCCCCCAGCTCACTGGGAGCCCTGCTA	102547303	intergenic							9.08483	25.9522	3.16474	4.53382	12.0804	6.27518	10.2159	7.7678	9.3096	37.281	33.2533	23.9648	3.41928	2.91458	3.20881	3.1163	4.36486	4.45841	4.69722	4.6148
ASRNV20035157	0.000146112	0.00630167	2.53539	down	noncoding	long noncoding	XR_599285	LOC102552097	RefSeq model	1147	chr1	+	282590472	282668602	CCTGCAGCAGCCTTGACCCGTGTTTCTGACTCCACACCGAATACCTAAGAAGAAGGAAAG	102552097	intergenic							19.176	49.8033	4.23937	5.58157	20.1841	19.5721	21.5713	15.3765	26.5622	71.6307	52.9466	48.0738	4.14642	4.52691	4.19376	4.09038	5.89638	5.40585	5.36255	5.66153
ASRNV20036789	0.000215455	0.00827316	2.53511	down	noncoding	long noncoding	XR_591175	LOC103691607	RefSeq model	381	chr13	-	30177987	30182775	CTTGTGGTTCTGTAATGGAAGATCTCAATCCCAGGGCCATCTTCACTTGGGGAAAGAGGC	103691607	intergenic							8.34391	23.6282	3.09929	4.44134	7.90414	9.43958	7.07341	8.95852	10.2923	34.2906	28.4128	21.5168	2.89387	3.44936	2.75068	3.30324	4.50388	4.33312	4.4746	4.45375
ASRNV20026641	4.48603e-05	0.00301526	2.50488	down	noncoding	long noncoding	uc.196+	uc.196	UCR	221	chr5	+	42530942	42531163	TTTAGATCTTTAATACCCTTTCCTTTTGTGTCAAGGAGCTCACGAGGCGTAAAGAAGCAC		intergenic							7.98353	22.7526	3.04843	4.37317	7.96816	8.11525	7.94348	7.90725	8.84378	32.5286	25.275	24.363	2.90438	3.25465	2.89343	3.14128	4.28315	4.26046	4.30827	4.64082
ASRNV20032018	2.92149e-06	0.000666215	2.5002	down	noncoding	long noncoding	XR_591423	LOC102550475	RefSeq model	911	chr2	+	284671782	284708123	GGAAAGGATTGCTGTATTCTCTGTTCTAATTCAATTCTGTGTTCATAGTTTTCATCAGGT	102550475	intergenic							5	13.6856	2.34756	3.6696	5	5	5	5	6.11667	20.2203	14.2658	14.1397	2.33557	2.36227	2.33678	2.35563	3.78297	3.56603	3.50525	3.82416
ASRNV20034146	0.000436579	0.01353	2.49534	down	noncoding	long noncoding	XR_589567	LOC103690735	RefSeq model	619	chr14	+	21986653	21988534	GCCTCCTTCTCCAGCTGTGAGAATAAAAGCTCACAAGAAACTTTCCAATGTACAACCAGT	103690735	exon sense-overlapping	NM_012883	Sult1e1	sulfotransferase family 1E member 1	+	21986924	22004132	14.4472	39.4348	3.8154	5.13464	15.6827	17.0648	15.0448	9.99646	14.826	65.0524	43.4249	34.4358	3.78496	4.31876	3.70352	3.45436	5.03003	5.2721	5.07645	5.15996
ASRNV20034146	0.00191364	0.0379546	2.49335	down	noncoding	long noncoding	XR_592350	LOC103692258	RefSeq model	521	chr4	-	244004395	244009675	ATCCAGGGATGCCTGCACAGCAAGTGACTCCAGTGCCAAGCCAGAGAGGAGGAATTCTCA	103692258	intergenic							7.07341	18.7321	2.79232	4.11041	5.02459	5	9.0983	9.17075	7.81977	26.3369	21.5902	19.1814	2.41042	2.36227	3.06251	3.33409	4.12676	3.94625	4.08435	4.28428
ASRNV20032975	3.86839e-05	0.00272392	2.46807	down	noncoding	long noncoding	ENSRNOT00000075256	LOC100911347	Ensembl	810	chr2	+	227743782	227820823	AGACAAAATGGTCAACAAAAAGCCCTCCAATGGACTGGAAATGCCACAAAGACCGGATAA	100911347	exon sense-overlapping	NM_001302749	LOC100363178	transmembrane and immunoglobulin domain containing 3	+	227743628	227821206	5	13.776	2.34756	3.65095	5	5	5	5	5.69681	21.8707	12.4531	15.0836	2.33557	2.36227	2.33678	2.35563	3.66949	3.67998	3.33206	3.92226
ASRNV20036920	3.86839e-05	0.00272392	2.46807	down	noncoding	long noncoding	ENSRNOT00000075256	LOC100911347	Ensembl	810	chr2	+	227743782	227820823	AGACAAAATGGTCAACAAAAAGCCCTCCAATGGACTGGAAATGCCACAAAGACCGGATAA	100911347	intron sense-overlapping	NM_001302750	LOC100911796	adenosine receptor A3-like	+	227793054	227796705	5	13.776	2.34756	3.65095	5	5	5	5	5.69681	21.8707	12.4531	15.0836	2.33557	2.36227	2.33678	2.35563	3.66949	3.67998	3.33206	3.92226
ASRNV20032784	3.86839e-05	0.00272392	2.46807	down	noncoding	long noncoding	ENSRNOT00000075256	LOC100911347	Ensembl	810	chr2	+	227743782	227820823	AGACAAAATGGTCAACAAAAAGCCCTCCAATGGACTGGAAATGCCACAAAGACCGGATAA	100911347	intron sense-overlapping	NM_012896	Adora3	adenosine A3 receptor	+	227793054	227796705	5	13.776	2.34756	3.65095	5	5	5	5	5.69681	21.8707	12.4531	15.0836	2.33557	2.36227	2.33678	2.35563	3.66949	3.67998	3.33206	3.92226
ASRNV20032720	0.000149221	0.00640908	2.4653	down	noncoding	long noncoding	XR_591506	LOC102552656	RefSeq model	469	chr3	-	46709541	46721042	CCTGTCTCCTTAATAAGCAACAAAAAATGGAAAGTTTCTGCATTAATTCTTCTCCTCGAA	102552656	intergenic							17.3437	47.0264	4.06972	5.37148	17.763	13.4413	22.9403	15.2301	15.5456	76.7299	47.2202	48.6098	3.96518	3.96058	4.27799	4.07513	5.09903	5.50672	5.19918	5.68101
ASRNV20036478	0.0023034	0.0425325	2.45977	down	noncoding	long noncoding	uc.293+	uc.293	UCR	243	chr1	+	271820075	271820318	AGGAAAGATTAAAGTTTAAAGAGAGCAAAATGCCATTACCTCGCCAGCCACCTCTCTCCG		intergenic							33.4598	82.1463	5.04186	6.34039	40.362	29.4524	27.2473	36.7775	49.6522	114.389	97.8345	66.7097	5.08932	5.14358	4.51916	5.41538	6.85556	6.10118	6.24266	6.16215
ASRNV20029019	0.00123811	0.0287347	2.45587	down	noncoding	long noncoding	XR_593469	LOC102552186	RefSeq model	420	chr7	+	68566141	68577136	AATGATCTCCTGTGTAGTCACATACTGTGACAGTCATAGTATGCCCTCACACTCTCACAC	102552186	intergenic							7.76846	22.816	2.98225	4.27848	10.2023	6.20774	5.94741	8.7164	6.26595	35.7656	26.9846	22.2479	3.21027	2.89833	2.5535	3.26689	3.81613	4.39355	4.40129	4.50295
ASRNV20032097	0.000582048	0.0170192	2.43687	down	noncoding	long noncoding	XR_353510	LOC102555246	RefSeq model	2984	chr4	-	197492443	197497239	GGAAATGGAAGTCGAGGGCTGTAATGGAGACCTCTCTCTATCTCCCTGTGCCTGCTGTAG	102555246	intergenic							43.5317	100.58	5.32605	6.61108	39.828	31.2644	71.448	31.5863	50.483	148.636	109.746	93.4567	5.07207	5.23319	5.80699	5.19193	6.87751	6.49283	6.40164	6.67232
ASRNV20031763	0.000154337	0.00657423	2.42428	down	noncoding	long noncoding	XR_345372	LOC102548741	RefSeq model	428	chr3	-	167115685	167116239	GAGTGAGACAGACAGTAAAGTGCCGGGCGCTATAGCTCTGGTTCTTCCCGCCCCTTACAA	102548741	natural antisense	NM_001047111	Dbndd2	dysbindin (dystrobrevin binding protein 1) domain containing 2	+	167115994	167118754	15.7833	41.0038	3.97357	5.25112	14.9232	15.5299	15.5709	17.1091	17.7783	60.5125	45.4357	40.2886	3.71689	4.17614	3.7501	4.25113	5.29699	5.16665	5.14152	5.39932
ASRNV20036751	7.75973e-06	0.00104558	2.42417	down	noncoding	long noncoding	XR_592828	LOC103692532	RefSeq model	359	chr6	-	1849089	1851119	AGATGGACTCAGATCCTCTAATTGAAACGGAAACCTTGCTCTCTCTCCACTCCTGAGATT	103692532	intergenic							64.5058	152.258	5.90922	7.18671	88.9321	47.027	75.7636	46.3004	64.5407	220.186	188.705	135.601	6.1278	5.85523	5.88731	5.76654	7.2688	7.05783	7.18065	7.23958
ASRNV20028380	0.00144433	0.0321512	2.42058	down	noncoding	long noncoding	NR_037147	Fam98c	RefSeq	1371	chr1	-	89270392	89273938	GGTGGACGGCGGGTGGAGCCGCGGAACCCGCTGCTCCCTGATGGCTTCTTCCTCCCGCAG	292764	exon sense-overlapping	NM_001198584	Fam98c	family with sequence similarity 98, member C	-	89270392	89273938	31.2291	82.6325	4.92123	6.19659	39.2318	22.0796	27.5777	36.0275	25.5856	129.462	94.0928	81.3901	5.04801	4.71142	4.53595	5.38956	5.84411	6.29298	6.18468	6.46458
ASRNV20028380	0.00033062	0.0113332	2.41589	down	noncoding	long noncoding	XR_591435	Lcn9	RefSeq model	1135	chr3	+	8634254	8636797	ATCATCCTCAGAGTTTCCAAGAGACTAGCCCCTGTTAAAGCATAATAAAACAGGGCACGG	296578	exon sense-overlapping	NM_001106560	Lcn9	lipocalin 9	+	8634274	8636629	5	12.6387	2.34756	3.62012	5	5	5	5	7.55454	17.9657	12.0624	12.9721	2.33557	2.36227	2.33678	2.35563	4.07615	3.41395	3.29529	3.69508
ASRNV20031052	2.54887e-05	0.00211067	2.39819	down	noncoding	long noncoding	XR_348847	LOC102551973	RefSeq model	2843	chr8	+	129730214	129733154	CACACTGTTGTGACACCTGTTCCTCCCACCCTGGAATGAATAAATAAATGTTAGAAAGAG	102551973	intergenic							61.1081	156.476	5.87901	7.14096	78.7115	52.1224	63.7066	49.892	52.3979	239.976	205.834	127.698	5.96278	6.02077	5.65938	5.87311	6.93498	7.18479	7.29512	7.14894
ASRNV20033101	0.00152753	0.0331482	2.39416	down	noncoding	long noncoding	XR_600257	LOC103695173	RefSeq model	459	chr3	-	78454650	78456800	TAAATGGAAGTGTCCACCTCGTGTCATCCTAAGAAAGAGAAGCCAGACTCGTAAAGACCT	103695173	intergenic							9.89702	27.0217	3.25741	4.51693	15.5478	7.7934	9.23836	7.00847	7.62277	44.5868	32.4823	23.3948	3.77073	3.20168	3.07985	2.97737	4.08937	4.73093	4.66497	4.58245
ASRNV20032166	0.00011652	0.00555804	2.39086	down	noncoding	long noncoding	XR_592833	LOC102551952	RefSeq model	1605	chr6	+	3599631	3607652	ATGGTCCTGTGCTGTTCTGACTGGTGCGTCGTGTCTCTAAATAAACATGCTAAACGATCA	102551952	intergenic							48.8089	118.952	5.56362	6.82116	57.9503	34.8744	50.8776	51.5334	51.2646	181.116	131.893	111.536	5.57811	5.39918	5.35565	5.92156	6.90124	6.77322	6.67273	6.93743
ASRNV20001871	0.00241785	0.0437538	2.38844	down	noncoding	long noncoding	uc.10-	uc.10	UCR	275	chr5	+	169178214	169178489	GCATCTCCTAATGGCCTCTGCTCCTCTACACTCAATTTAAACACAATTTAAAAACTATAA		intergenic							161.74	363.519	7.28265	8.53872	161.189	141.226	178.77	165.775	195.807	486.996	429.136	342.139	6.91166	7.54933	7.02938	7.64024	8.99127	8.20649	8.35646	8.60066
ASRNV20034036	2.01333e-05	0.00187747	2.38736	down	noncoding	pseudogene	ENSRNOT00000072614	AABR06002821.1	Ensembl	897	chr1	+	61436475	61437374	TTTCCTTCTTTTGGCCCCTTTATCATGAGCCATGATGTCACTATTTCCAGATTATGTTCA		intronic antisense	ENSRNOT00000071327	Vmn1r228		-	61001927	61683450	14.474	36.585	3.80368	5.05909	18.4544	10.8268	16.772	11.8428	14.484	51.3086	47.1647	33.3828	4.02374	3.63662	3.85064	3.70371	4.99254	4.93287	5.19714	5.11381
ASRNV20034987	0.00269254	0.0467355	2.38614	down	noncoding	long noncoding	XR_593545	LOC102550763	RefSeq model	1400	chr7	-	100180915	100196110	AGACTTCCCGACCAGGAAACACCCAGGCAGAGGACCCATATTGTGTAAAGCAGAGCACCT	102550763	bidirectional	NM_017136	Sqle	squalene epoxidase	+	100197093	100211968	12.1492	29.459	3.56592	4.8206	10.3076	15.2258	14.4518	8.61161	16.6565	43.4657	30.3628	27.351	3.2234	4.14386	3.64348	3.25293	5.2054	4.69039	4.56705	4.81955
ASRNV20034856	0.000592641	0.0172315	2.38496	down	noncoding	long noncoding	XR_594738	LOC102554974	RefSeq model	2269	chr10	-	53412980	53415589	AACCAAACCCTTTGTAGGACCTGCTTTGAGCTAAGGAAAAATGGTGGGTGGAACAGTGTT	102554974	intergenic							5.05836	13.3976	2.43585	3.68981	5.1101	5.12334	5	5	8.4078	18.8405	15.0566	11.2854	2.42099	2.63001	2.33678	2.35563	4.22034	3.47102	3.57927	3.48862
ASRNV20035154	0.000179487	0.00728574	2.36408	down	noncoding	long noncoding	XR_589942	LOC102549494	RefSeq model	1200	chr12	+	8193962	8196239	CTGGGTCAAAAGTAGGGCTTTTGGCTCCTTCTGTTTGTTTGTTTCTCCTCTTCCTTCTAG	102549494	intergenic							37.692	94.9781	5.21547	6.45675	38.616	40.1073	41.3187	30.726	35.5916	142.056	109.876	92.389	5.02526	5.61587	5.06983	5.15091	6.34709	6.42441	6.40301	6.65249
ASRNV20035154	0.000667523	0.0189655	2.36228	down	noncoding	long noncoding	XR_340333	LOC102547760	RefSeq model	465	chr14	+	76190491	76202331	GCCAGAATGGGTCTTCCACACTTATGAACAAAAACTTCCCGTGACCTACTTTCCATCTTG	102547760	intergenic							14.527	38.4992	3.8235	5.06369	14.5881	10.6154	17.6538	15.2508	11.3031	58.0645	43.7956	40.8335	3.6813	3.61251	3.922	4.07821	4.63943	5.10971	5.08981	5.41579
ASRNV20035154	0.00175309	0.0357913	2.34831	down	noncoding	long noncoding	XR_590397	LOC102547456	RefSeq model	1525	chr1	-	171077409	171105324	GATTTCCAAGGCTACCCTCGTGGCAAGGATCATTCTGAGGCATCAATAGCAGGTCTTCTC	102547456	intronic antisense	ENSRNOT00000031908	Xrra1	X-ray radiation resistance associated 1	+	171052577	171097583	6.7839	17.1025	2.71841	3.95004	5.57147	5	10.6082	5.95595	6.16514	24.2665	18.583	19.3956	2.48591	2.36227	3.25271	2.77277	3.79451	3.83409	3.8697	4.30184
ASRNV20035154	0.000100049	0.00515226	2.33472	down	noncoding	long noncoding	XR_590562	LOC103691270	RefSeq model	543	chr1	-	223791781	223794619	AACTAAGATATGGGAGGTCTCAAGTTCGCAATAGATGCTATTCTGACCCTTGTCATCGGC	103691270	intron sense-overlapping	NM_181480	Nadsyn1	NAD synthetase 1	-	223722250	223869610	5	12.3023	2.34756	3.57081	5	5	5	5	6.84192	16.4925	13.9204	11.9544	2.33557	2.36227	2.33678	2.35563	3.93735	3.30058	3.47186	3.57347
ASRNV20028316	0.00026774	0.00979284	2.32444	down	noncoding	long noncoding	XR_593273	LOC103692775	RefSeq model	663	chr14	-	23274824	23300569	AATAGAACCTCATCACTTCTGTGTACCTGGATGTAAGGTTGGCTAGTCCCCAACAAGTTC	103692775	natural antisense	NM_001033652	Tmprss11d	transmembrane protease, serine 11d	+	23218326	23289174	5.85786	16.9612	2.64662	3.86351	6.81905	5.406	5	6.2064	5.64623	26.9461	22.4749	12.7775	2.70777	2.71477	2.33678	2.82717	3.65817	3.98154	4.14141	3.6729
ASRNV20031183	0.00026774	0.00979284	2.32444	down	noncoding	long noncoding	XR_593273	LOC103692775	RefSeq model	663	chr14	-	23274824	23300569	AATAGAACCTCATCACTTCTGTGTACCTGGATGTAAGGTTGGCTAGTCCCCAACAAGTTC	103692775	natural antisense	NM_022630	Tmprss11d	transmembrane protease, serine 11d	+	23273514	23289174	5.85786	16.9612	2.64662	3.86351	6.81905	5.406	5	6.2064	5.64623	26.9461	22.4749	12.7775	2.70777	2.71477	2.33678	2.82717	3.65817	3.98154	4.14141	3.6729
ASRNV20030439	0.00300716	0.0499633	2.31603	down	noncoding	long noncoding	XR_595765	Spata18	RefSeq model	1919	chr14	-	36904866	36931152	AGGGGCTTTTGTACGGTGGCCTTGCATAGTGACAGTTCATCCCCAGAGTTTGCTTCACAA	289586	exon sense-overlapping	NM_199374	Spata18	spermatogenesis associated 18	-	36904434	36931140	17.1606	39.5331	3.972	5.18366	12.4795	11.2624	29.227	15.6734	16.8808	60.9691	44.4235	35.8591	3.46251	3.70082	4.60633	4.11836	5.22601	5.17842	5.1109	5.21929
ASRNV20029941	4.4153e-05	0.00298711	2.30605	down	noncoding	long noncoding	XR_341856	LOC102549443	RefSeq model	973	chr18	-	25940644	25952507	GCTGGTGAACTATACTTACCCTTAGCCTCTTTGGGAGTGAATTTAACAGTTAAGAGTATA	102549443	intergenic							5.28359	12.917	2.40824	3.61367	5	5	6.13437	5	6.43798	18.5006	13.7053	13.0242	2.33557	2.36227	2.57949	2.35563	3.85388	3.44936	3.45022	3.7012
ASRNV20032899	3.12114e-05	0.00239311	2.30337	down	noncoding	long noncoding	XR_594719	Bcl6b	RefSeq model	1595	chr10	-	56580444	56584222	TCTTGGTCTTCGTGCCCACCGCCGTCTTGGAGGCATTCTGACTGTCATCTTCACTTCCAG	360551	exon sense-overlapping	ENSRNOT00000025430	Bcl6b		-	56580142	56583586	21.462	53.6621	4.41319	5.61693	22.3571	21.2309	22.723	19.5372	20.8364	77.118	65.0848	51.609	4.2938	4.64681	4.26006	4.45208	5.52421	5.51361	5.6523	5.77761
ASRNV20034115	3.12114e-05	0.00239311	2.30337	down	noncoding	long noncoding	XR_594719	Bcl6b	RefSeq model	1595	chr10	-	56580444	56584222	TCTTGGTCTTCGTGCCCACCGCCGTCTTGGAGGCATTCTGACTGTCATCTTCACTTCCAG	360551	exon sense-overlapping	NM_001108279	Bcl6b	B-cell CLL/lymphoma 6B	-	56578677	56583601	21.462	53.6621	4.41319	5.61693	22.3571	21.2309	22.723	19.5372	20.8364	77.118	65.0848	51.609	4.2938	4.64681	4.26006	4.45208	5.52421	5.51361	5.6523	5.77761
ASRNV20028766	0.0027416	0.04714	2.29947	down	noncoding	long noncoding	XR_346925	LOC102556835	RefSeq model	290	chr5	+	174804729	174805794	CCCTGCCATGAGGGAGCCCGTGGGCCAGGAAAGGATTTCTTGCTTCTGCGTGTCATAGCT	102556835	natural antisense	ENSRNOT00000041283	Ccdc27		-	174804327	174818985	6.48477	17.496	2.68647	3.88777	8.19928	5	5	7.73979	5.08894	26.6923	23.4355	14.7672	2.93621	2.36227	2.33678	3.11064	3.49859	3.96564	4.19977	3.88709
ASRNV20032613	0.0027416	0.04714	2.29947	down	noncoding	long noncoding	XR_346925	LOC102556835	RefSeq model	290	chr5	+	174804729	174805794	CCCTGCCATGAGGGAGCCCGTGGGCCAGGAAAGGATTTCTTGCTTCTGCGTGTCATAGCT	102556835	natural antisense	NM_001191063	Ccdc27	coiled-coil domain containing 27	-	174804327	174818985	6.48477	17.496	2.68647	3.88777	8.19928	5	5	7.73979	5.08894	26.6923	23.4355	14.7672	2.93621	2.36227	2.33678	3.11064	3.49859	3.96564	4.19977	3.88709
ASRNV20027325	0.000595159	0.0172563	2.29783	down	noncoding	long noncoding	XR_593125	LOC103692681	RefSeq model	265	chr6	-	121347945	121352634	TCCATCATAAATAGCTTCTTGGTGTCAATAGATGTGATGACTTCTTCCCTTCCTGCTTGA	103692681	intergenic							13.9381	33.008	3.76549	4.96576	17.8943	11.0506	12.8309	13.9766	16.6286	40.5344	45.0422	29.8267	3.97484	3.6687	3.47252	3.94589	5.20229	4.5851	5.13128	4.94437
ASRNV20028429	0.000317428	0.0111758	2.29782	down	noncoding	pseudogene	ENSRNOT00000029702	AABR06071562.1	Ensembl	1854	chr12	-	33681222	33683082	GTGGATGTGTATTGGAGCCGCGACGACAAGCGCTTCGCTGGGTCTTGGCTGGCCATCTGG		exon sense-overlapping	NM_001271192	Fzd10	frizzled class receptor 10	-	33680148	33683346	5.71193	15.2381	2.56961	3.76987	6.13236	6.71536	5	5	5.65534	22.8679	17.7732	14.6562	2.5776	3.00841	2.33678	2.35563	3.6605	3.74242	3.8014	3.87516
ASRNV20028398	0.00119668	0.0279613	2.25761	down	noncoding	long noncoding	uc.448-	uc.448	UCR	232	chr1	+	95133693	95133925	CTCTCCTCCTGCCACAACAATCAATTCCTCTTATAAATCTGATTAGATTTTATGATGCTT		intergenic							36.1282	85.4412	5.14636	6.32116	34.4007	28.1148	36.9497	45.0476	34.0868	121.028	105.117	81.5336	4.86901	5.07508	4.92205	5.71931	6.27883	6.19685	6.34136	6.46759
ASRNV20030238	0.000321827	0.0112501	2.25372	down	noncoding	long noncoding	XR_342697	LOC102556655	RefSeq model	1041	chr1	+	56563903	56573758	CAACTTCTCTGTCACATGATCTCTACAGTTACAAGAATACTCCTGTATCAACAATTACAA	102556655	intergenic							5.85432	14.183	2.50515	3.67746	5	5	8.41727	5	5.58845	22.3718	15.1206	13.6512	2.33557	2.36227	2.96715	2.35563	3.64214	3.71061	3.58637	3.77073
ASRNV20034469	0.00134338	0.0305611	2.24248	down	noncoding	long noncoding	XR_590705	LOC103691365	RefSeq model	1032	chr1	+	272906938	272908495	CAGCGGTGAAGATGGTCCAAATTCGACACCCAGCCTCCACATGTTTGTAACTCCAGTTCC	103691365	intergenic							15.544	36.7648	3.93558	5.10068	15.152	19.2797	15.4186	12.3256	15.8736	50.9315	42.3233	37.9306	3.73781	4.50623	3.73699	3.76129	5.13115	4.92196	5.0416	5.30801
ASRNV20033892	0.0011132	0.0265502	2.21968	down	noncoding	long noncoding	XR_345890	LOC102549526	RefSeq model	954	chr4	+	165254887	165269347	ATCAAAGAGAAGTAAAGATCAAGGAACCCCATGCCTGCTCACTAACCTATAGGTGACAGG	102549526	intronic antisense	NM_001107865	Tcf7l1	transcription factor 7 like 1	-	165263182	165426980	25.5114	57.484	4.65292	5.80327	21.3816	24.8965	32.0942	23.6731	31.7186	78.3671	68.4358	51.4143	4.23239	4.89968	4.7363	4.74329	6.1733	5.53973	5.72694	5.7731
ASRNV20030610	0.002857	0.0485596	2.20991	down	noncoding	long noncoding	XR_352365	LOC102550779	RefSeq model	701	chr3	+	63577827	63579721	ACATTCAGAATGTGCACAGTGCAACATTTGTATGCCGGTGTCTGTCCTAGTGAGTTGTTG	102550779	intergenic							10.5062	24.1461	3.33936	4.48334	12.3958	12.1541	11.8161	5.65885	11.1864	35.4344	28.359	21.6048	3.45325	3.814	3.38067	2.7095	4.62429	4.37917	4.47081	4.4591
ASRNV20035220	0.00213825	0.0405366	2.20943	down	noncoding	long noncoding	uc.135-	uc.135	UCR	201	chr2	-	137110291	137110492	TGGCCAAGGCATTTCACTTCCTGGAACCCCAGCTATGGATAAAACGTCCATGGTTAATAT		exon sense-overlapping	ENSRNOT00000068381	Mecom		-	137080582	137139270	11.4139	28.0828	3.4924	4.63607	13.5584	14.1609	8.72364	9.21269	10.4271	45.6757	32.9284	23.2999	3.58129	4.03661	3.01012	3.34159	4.52175	4.76314	4.6828	4.57661
ASRNV20034441	0.00213825	0.0405366	2.20943	down	noncoding	long noncoding	uc.135-	uc.135	UCR	201	chr2	-	137110291	137110492	TGGCCAAGGCATTTCACTTCCTGGAACCCCAGCTATGGATAAAACGTCCATGGTTAATAT		exon sense-overlapping	NM_001106423	Mecom	MDS1 and EVI1 complex locus	-	137080582	137665758	11.4139	28.0828	3.4924	4.63607	13.5584	14.1609	8.72364	9.21269	10.4271	45.6757	32.9284	23.2999	3.58129	4.03661	3.01012	3.34159	4.52175	4.76314	4.6828	4.57661
ASRNV20031310	0.00211212	0.0403369	2.20782	down	noncoding	long noncoding	XR_597330	RT1-T24-3	RefSeq model	2131	chr20	+	5324178	5355962	TGAAGGGACGTCCCAGAAATCAGAAGATCGGCCCTAGCTTGTCTGCCTCATCTGGTAACA	414788	exon sense-overlapping	NM_001166403	RT1-T24-3	RT1 class I, locus T24, gene 3	+	5324556	5331860	16.7295	41.4359	4.02123	5.16386	23.262	15.0651	14.3385	14.2523	12.085	63.7299	46.1502	43.7785	4.34978	4.12576	3.63228	3.97711	4.73187	5.24208	5.16331	5.51816
ASRNV20031177	0.00211212	0.0403369	2.20782	down	noncoding	long noncoding	XR_597330	RT1-T24-3	RefSeq model	2131	chr20	+	5324178	5355962	TGAAGGGACGTCCCAGAAATCAGAAGATCGGCCCTAGCTTGTCTGCCTCATCTGGTAACA	414788	intron sense-overlapping	ENSRNOT00000061299	AABR06099817.1		+	5344904	5347354	16.7295	41.4359	4.02123	5.16386	23.262	15.0651	14.3385	14.2523	12.085	63.7299	46.1502	43.7785	4.34978	4.12576	3.63228	3.97711	4.73187	5.24208	5.16331	5.51816
ASRNV20009094	1.05567e-06	0.000404712	2.1966	down	noncoding	long noncoding	XR_593204	LOC102546875	RefSeq model	2234	chr6	+	143850765	143859001	CATGCTCCTGAGACCAGTTCATTCAGGCTAGAGTGGTGATTACATTAGCCAAAGAACATC	102546875	intergenic							5	12.0143	2.34756	3.48284	5	5	5	5	5.57473	18.4221	12.8236	11.2369	2.33557	2.36227	2.33678	2.35563	3.63721	3.44356	3.36762	3.48296
ASRNV20034203	0.00120741	0.0281484	2.19244	down	noncoding	long noncoding	XR_592582	LOC102547558	RefSeq model	807	chr5	-	109020346	109021537	AGCTAGAATGTGCTTTGTGGTGCCTCTGCTTAGTTATTTATTATTTTGGTGCTGGGGACT	102547558	intergenic							27.2542	64.1639	4.76398	5.89651	28.287	25.2339	23.9362	31.5595	26.1066	89.6007	78.3543	62.5942	4.60766	4.9188	4.33897	5.19048	5.86978	5.73477	5.91867	6.06284
ASRNV20027843	0.00183766	0.0367923	2.18901	down	noncoding	long noncoding	XR_596633	LOC102554241	RefSeq model	1200	chr17	-	13941421	13948252	AATTCCCTGGATATCCTAACCCCCCAGGAGCTTCAGACCATGACTTCATTTCAAGATAAG	102554241	intergenic							14.8557	35.0008	3.80122	4.93149	23.4026	10.8086	14.2423	10.9694	11.1177	54.4977	42.8249	31.563	4.35725	3.63413	3.62251	3.59099	4.61593	5.02345	5.05788	5.02872
ASRNV20036863	0.000477558	0.0147119	2.1857	down	noncoding	long noncoding	XR_592515	LOC103692353	RefSeq model	1074	chr5	-	74192134	74201214	TAACCCTCCCCACTGGGTCCTACCCACATACAAACATGGAAGGAGAATGATTTTTAAACC	103692353	intergenic							25.2751	59.0203	4.65935	5.78744	25.9173	25.945	23.2111	26.0268	26.3607	87.1389	68.8011	53.7804	4.49111	4.9563	4.29762	4.89236	5.8845	5.69148	5.73421	5.83957
ASRNV20026960	0.000890195	0.0229064	2.17061	down	noncoding	long noncoding	XR_589935	LOC103690969	RefSeq model	2417	chr1	+	49010351	49049083	CAGAGTTCTGGTTCCCAGGATGAAACTGTCAGAAATCTATTTCCTTACTCTCCCACATAG	103690969	intergenic							21.0632	50.0515	4.37574	5.49384	25.7651	21.9689	17.7284	18.7905	20.9858	86.3729	50.0137	42.8336	4.48338	4.70446	3.92733	4.38778	5.53439	5.67904	5.27631	5.4856
ASRNV20026960	0.0015258	0.0331482	2.16987	down	noncoding	long noncoding	XR_593823	LOC102552631	RefSeq model	2874	chr14	+	60456669	60461640	ATTTTATCTCTGTGCACAGGAGTTCCAGTGACCTTTCTACAGCTAGTCAACAGCAGCAGT	102552631	intergenic							8.19072	19.4181	3.06878	4.18638	9.25041	6.72367	8.90661	7.88218	9.2851	26.0459	17.5982	24.7433	3.09353	3.01115	3.03437	3.13605	4.3611	3.92996	3.78699	4.66747
ASRNV20032674	0.000178083	0.00725723	2.15136	down	noncoding	long noncoding	XR_589165	LOC103690475	RefSeq model	2246	chr8	+	130020595	130033894	AATGGAAGAACAGCCACTCAGCCTGACAGCACTGCAGATGCCGCTTCTCTGACACCCATC	103690475	intronic antisense	ENSRNOT00000035371	Ano10	anoctamin 10	-	130005121	130077030	12.8413	30.8962	3.65431	4.75956	17.0863	11.4107	11.6707	11.1977	11.1249	52.0151	35.5694	24.8755	3.90632	3.72086	3.36622	3.62386	4.61644	4.95385	4.79282	4.67514
ASRNV20033275	0.00100288	0.0248346	2.14532	down	noncoding	long noncoding	XR_595740	LOC102548839	RefSeq model	2324	chr14	+	18687147	18692650	GCTGGTGGTTCAGAAGACGGTTGCTACGTGGACATCCTCATTCAACCCTGAAAGCTGCTG	102548839	intergenic							12.4815	27.1652	3.60535	4.70654	11.1178	11.0609	16.9758	10.7713	14.6172	34.2742	32.023	27.7462	3.3171	3.67039	3.86754	3.56636	5.00744	4.33181	4.64601	4.84092
ASRNV20033653	0.00233742	0.0427466	2.14442	down	noncoding	long noncoding	uc.350+	uc.350	UCR	240	chr15	+	85864929	85865169	GTTACCTGCTTCTTCATATTAATATCTATACACAGTTTGAATTGCCTCGTTTGCATATGC		intergenic							8.59632	19.4184	3.13975	4.24033	7.67195	8.23367	9.51495	8.96473	12.2601	26.0879	19.6553	19.6704	2.8567	3.27811	3.11965	3.30454	4.74988	3.93287	3.95365	4.32494
ASRNV20034818	0.000191748	0.00760454	2.1407	down	noncoding	long noncoding	XR_592454	LOC103692324	RefSeq model	1152	chr13	-	98362067	98365686	ACCCTCAAAAAAGTTTGTAGCTTAGTGCTCGCTGACTGTCTATCATGTCTGTCTGTCTGC	103692324	intergenic							15.4997	37.4128	3.92255	5.02063	18.7241	12.8559	17.2578	13.1611	11.8742	54.3178	52.0478	31.4115	4.04272	3.89762	3.89104	3.8588	4.70375	5.01768	5.33805	5.02303
ASRNV20031526	0.000185752	0.0074814	2.11284	down	noncoding	long noncoding	XR_593210	LOC102554678	RefSeq model	1099	chr6	+	144468780	144475503	GACTGAAAAGGTGGCCGTGGGCTTTCCAGGTTCTACTTGCCGTTGTGTGAGTTCTCATTT	102554678	intergenic							12.6332	28.9591	3.61924	4.69842	17.5801	10.0816	11.6632	11.2078	10.6875	45.0051	33.2466	26.8972	3.95002	3.53648	3.3653	3.62513	4.55943	4.74275	4.69685	4.79464
ASRNV20035725	0.000486941	0.0149122	2.1091	down	noncoding	long noncoding	uc.252+	uc.252	UCR	231	chr5	+	106672314	106672545	TGGTCAAGTCCTTAATTGGCTGGGCTTCCTGAGAAAGCAATTTTCTATTCCCCAAACTGT		intronic antisense	NM_001106666	Bnc2	basonuclin 2	-	106424109	106751748	7.89767	19.8265	3.03314	4.10977	8.40533	7.79066	7.59971	7.79498	6.02399	30.1362	22.1198	21.0261	2.97115	3.20122	2.83979	3.12041	3.75804	4.14262	4.11729	4.42115
ASRNV20033324	0.00225238	0.0420838	2.09944	down	noncoding	long noncoding	XR_348682	LOC102557166	RefSeq model	1991	chr8	-	104077979	104102935	ACTTGGCATTTACTGAGTACCCACTATCTACCAGCCTTATTCCACGAGCTAGAAACACAA	102557166	intergenic							29.686	63.8631	4.86554	5.93554	28.7804	35.4862	31.615	22.8624	31.9574	92.358	72.1843	58.9527	4.63075	5.42785	4.71368	4.68988	6.18577	5.78387	5.79843	5.9741
ASRNV20028341	0.00107406	0.0260569	2.09571	down	noncoding	long noncoding	XR_590285	LOC102546835	RefSeq model	2316	chr1	-	123957030	123991095	ACAACAGAGGACTTCCTGGGCTGGTCAATGTCTTTGAATAACTGTCCATTGCATTTGGTG	102546835	intergenic							18.7979	43.6877	4.17626	5.2437	22.0818	17.9193	22.8651	12.3253	13.6986	68.1228	54.7933	38.1359	4.27669	4.39511	4.27249	3.76075	4.90739	5.33864	5.41235	5.3164
ASRNV20032184	7.76817e-05	0.00437001	2.09355	down	noncoding	long noncoding	uc.51+	uc.51	UCR	207	chr14	-	111045931	111046138	GAAGCATGTGGCACACCATTAAAACCTTGTGGCTTGTCTGCATTTACATTTATAATTATT		intergenic							6.69633	16.8737	2.81499	3.88094	7.01968	6.15891	7.40701	6.19972	5.40778	24.5866	21.7939	15.7067	2.74184	2.88618	2.80644	2.82547	3.59301	3.85193	4.09688	3.98193
ASRNV20036031	0.00259375	0.0457374	2.07736	down	noncoding	long noncoding	XR_597276	LOC103694348	RefSeq model	546	chr19	-	63920200	63924361	TACATAGCAGATGTCCCCACGACACTGGCTCCTGCTGCCCATTAGAGACTGTGAGTCCTG	103694348	intergenic							38.0534	82.3002	5.22543	6.28018	47.0615	38.0545	29.6778	37.4197	34.6259	118.126	96.9482	79.5011	5.29859	5.53738	4.62728	5.43847	6.30395	6.15681	6.23098	6.42898
ASRNV20031730	0.000357142	0.0119637	2.07243	down	noncoding	long noncoding	uc.133-	uc.133	UCR	277	chr2	-	183676468	183676745	TCCGATTTAATTTCCTCCATGCCCTTGACATCCACAGATACCATTAAGATTAAGCGCATA		intronic antisense	ENSRNOT00000051977	Rsrc1		+	183491964	183881122	25.9334	58.2137	4.69179	5.74311	28.0577	26.2788	24.2682	25.1289	22.8908	84.8609	69.9395	55.1635	4.595	4.97698	4.35803	4.83716	5.67661	5.65719	5.75769	5.88097
ASRNV20035189	0.000357142	0.0119637	2.07243	down	noncoding	long noncoding	uc.133-	uc.133	UCR	277	chr2	-	183676468	183676745	TCCGATTTAATTTCCTCCATGCCCTTGACATCCACAGATACCATTAAGATTAAGCGCATA		intronic antisense	NM_001014172	Rsrc1	arginine/serine-rich coiled-coil 1	+	183478535	183881358	25.9334	58.2137	4.69179	5.74311	28.0577	26.2788	24.2682	25.1289	22.8908	84.8609	69.9395	55.1635	4.595	4.97698	4.35803	4.83716	5.67661	5.65719	5.75769	5.88097
ASRNV20027922	0.00279054	0.0478227	2.0606	down	noncoding	long noncoding	XR_592266	LOC102553636	RefSeq model	467	chr4	-	224110374	224116931	GGACCGTTCCCTGGGTATGGGTTCTGGGCTGTAGAATAAGGAGGCCAGCTTGTGAGGACT	102553636	intergenic							14.5319	31.0716	3.82953	4.8726	12.4403	17.5069	16.7614	11.4188	15.5648	46.7738	32.4287	29.5191	3.45905	4.35539	3.84956	3.65415	5.10163	4.79711	4.66298	4.92868
ASRNV20037069	6.96224e-05	0.00409467	2.05525	down	noncoding	long noncoding	XR_590904	LOC103691457	RefSeq model	1263	chr12	-	52866037	52882697	AATGGGAGGTGGGCCTTCACTCCAGCTATTCTCAGCCTCCCAGAGTTCTCCGTGAGTGAT	103691457	intergenic							28.7814	63.2588	4.83064	5.86995	32.5433	27.7859	29.5393	25.2572	25.3273	91.3527	74.8546	61.5008	4.79664	5.05992	4.62049	4.8455	5.82859	5.76577	5.85048	6.03495
ASRNV20034377	0.00139005	0.0312113	2.05353	down	noncoding	long noncoding	uc.258+	uc.258	UCR	201	chr5	+	64911632	64911833	ATTGTGAACATATTTCCTGAAAGCCCTGTCACTCATCACAGCTACATTTTCTCCCGGGGA		intron sense-overlapping	NM_001106658	Zcchc7	zinc finger CCHC-type containing 7	+	64759111	64938827	42.3354	88.0863	5.317	6.35511	35.4757	36.9087	66.0759	30.8813	33.7898	126.641	107.051	84.8629	4.91365	5.48969	5.7053	5.15936	6.26598	6.26089	6.37042	6.52314
ASRNV20029730	0.00041828	0.0132136	2.04645	down	noncoding	long noncoding	XR_591909	LOC102550673	RefSeq model	2204	chr3	+	177302506	177312856	CAGGAGCCAGAGGGCTTCGGAGCACAGAGGCCACTTCCACATCGTTGGCCGGGGGAATGA	102550673	intergenic							9.04806	19.8914	3.20029	4.23342	10.4069	8.7441	7.85792	9.18334	10.2749	28.1907	22.5593	18.5405	3.2349	3.35254	2.87818	3.33554	4.50148	4.04823	4.1462	4.23776
ASRNV20008581	1.85856e-05	0.00178129	2.04344	down	noncoding	long noncoding	XR_590057	Clasrp	RefSeq model	2208	chr1	-	81757540	81781782	TTTTGTGCAGCGCCGCCTCTCTCCTTCGCTCAACCTCTAACTTCCGCTTCCGGTGCGGGT	499390	exon sense-overlapping	NM_001024294	Clasrp	CLK4-associating serine/arginine rich protein	-	81757540	81781715	62.5579	129.981	5.91714	6.94814	67.3101	49.2691	76.0878	57.5645	53.0413	185.798	159.021	122.064	5.76737	5.92877	5.89218	6.08024	6.95336	6.81411	6.94242	7.08266
ASRNV20000813	0.00124347	0.0287945	2.02297	down	noncoding	long noncoding	uc.182-	uc.182	UCR	239	chr10	+	18044727	18044966	TCTTGAGTTTTGAACAACTGCCTCTTTGACCTTTCACCTTCATGCTGTGCACCAGTAGCA		intronic antisense	NM_001106994	Ranbp17	RAN binding protein 17	-	18024415	18328821	37.1378	81.0493	5.2088	6.22528	36.5668	38.7581	37.5579	35.6685	29.8443	115.896	96.77	81.6869	4.95305	5.56385	4.94484	5.37347	6.07816	6.12497	6.2284	6.46957
ASRNV20029988	4.03712e-05	0.00280743	2.01722	down	noncoding	long noncoding	XR_594782	LOC103693371	RefSeq model	654	chr15	-	22227638	22234392	ATGTCTCCACAACATGGAGTTTGCTCAGAAGGCATCATGCCAGCCCTCCTCGACCCCTGA	103693371	intergenic							27.5589	59.8887	4.75898	5.77135	33.3057	24.4067	28.3482	24.1748	22.5572	90.112	68.0689	58.8169	4.82373	4.86704	4.57297	4.77218	5.65059	5.74379	5.72016	5.97084
ASRNV20030982	0.00143137	0.0320003	2.0086	down	noncoding	long noncoding	XR_591821	LOC102551402	RefSeq model	885	chr3	-	163103784	163117180	AATTGAAAAACTCCAAATGGACCCTGGCCCTTGAAGTGAAAATGACATAGAAGAACAGAG	102551402	intronic antisense	NM_001014184	Lpin3	lipin 3	+	163113544	163126529	18.4776	38.8288	4.20345	5.20965	18.2163	19.3148	17.4764	18.9029	20.6777	56.5828	42.8807	35.1742	4.0012	4.50826	3.90717	4.39719	5.51394	5.07465	5.05952	5.19048
